# Supplementary material for: An improved procedure to prepare 3-methyl-4-nitroalkylenethylisoxazoles and their reaction under catalytic enantioselective Michael addition with nitromethane
Source: Royal Society of Chemistry journal article supplement (doi:10.1039/c4ob02109f), 2014-12-02

**An improved procedure to prepare 3-methyl-4-nitroalkylenethylisoxazoles and their reactivity in catalytic enantioselective Michael addition with nitromethane.**

*Maria Moccia\*, Robert J. Wells and Mauro F. A. Adamo \**

Centre for Synthesis and Chemical Biology (CSCB), Department of  
Pharmaceutical and Medicinal Chemistry, the Royal College of  
Surgeons in Ireland, 123 St. Stephen's Green, Dublin 2, Ireland  
Fax: (+353) 1 4022168

E-mail: [madamo@rcsi.ie](mailto:madamo@rcsi.ie),

E-mail: [mariamoccia@rcsi.ie](mailto:mariamoccia@rcsi.ie)

**Supporting Information**

## General Experimental Details

$^1\text{H}$ ,  $^{13}\text{C}$ , NMR spectra were recorded on a Varian AS 300, Bruker 400 and 600 spectrometer. Chemical shifts ( $\delta$ ) are reported in ppm relative to residual solvent signals for  $^1\text{H}$  and  $^{13}\text{C}$  NMR ( $^1\text{H}$  NMR: 7.26 ppm for  $\text{CDCl}_3$ ;  $^{13}\text{C}$  NMR: 77.0 ppm for  $\text{CDCl}_3$ .  $^{13}\text{C}$  NMR spectra were acquired with  $1\text{H}$  broad band decoupled mode.  $\text{DMSO-d}_6$  (referenced to 2.52 and 3.35 ppm for  $1\text{H}$  and 40.0 for  $^{13}\text{C}$ ). Coupling constants ( $J$ ) are in Hz. Multiplicities are reported as follows: s, singlet, d, doublet, dd, doublets of doublets, t, triplet, q, quartet, m, multiplet, c, complex, and br, broad.  $1\text{H}$ -NMR spectral assignments are supported by  $^1\text{H}$ - $^1\text{H}$  COSY and  $^{13}\text{C}$ - $^1\text{H}$ -COSY where necessary. Carbon spectra are supported by DEPT analysis where necessary.

Melting points were determined using a Stuart scientific melting point apparatus and are uncorrected. Infrared spectra (IR) were recorded as KBr discs using a Bruker Tensor27 FT-IR instrument. Absorption maximum ( $\nu_{\text{max}}$ ) was reported in wave numbers ( $\text{cm}^{-1}$ ) and only selected peaks are reported. High resolution mass spectra were obtained on a Waters Micro mass LCT and low resolution mass spectra were recorded on Waters Micro mass Quattro LC-MS spectrometers at 70 eV. Tetrahydrofuran was freshly distilled over sodium benzophenone prior to use according to standard procedure. All other reagents and solvents were used as purchased from Aldrich. Reactions were checked for completion by TLC (EM Science, silica gel 60 F254) which were visualized by quenching of u.v. fluorescence ( $\lambda_{\text{max}} = 254\text{nm}$ ) or by staining with either 10% w/v ammonium molybdate in 2M sulphuric acid or basic potassium permanganate solution (followed by heat) as appropriate. Flash chromatography was performed using silica gel 60 (0.040- 0.063 mm, 230-400 mesh).

The enantiomeric excess (ee) of the products was determined by chiral stationary phase HPLC (Daicel Chiralpak AD, Chiracel OJ,

Chiracel OD, Chiralpak AS columns), using a UV detector operating at 254 nm. Retention factors ( $R_f$ ) are reported to  $\pm 0.05$ .

### General procedure for the synthesis of alcohol: compounds 6a-i

In a round bottomed flask fitted with a magnetic stirrer 5 mmol of 3,5-dimethyl-4-nitroisoxazole **1** (710 mg, 5 mmol) was dissolved in THF (4mL) then a H<sub>2</sub>O/MeOH mixture (3:7, 12mL) was added. To the cloudy solution NaOH powder (40 mg, 1.0 mmol, 0.2 equiv) was added. The solution turned deep yellow and was stirred at room temperature for 30 minutes then aldehydes **5a-i** (6 mmol, 1,2 equivalents) were added dropwise over 30 minutes. The reaction mixture was stirred at room temperature for 36h-60h, then the THF was removed under vacuum, the mixture extracted with dichloromethane (x3) dried over sodium sulphate and the solvent removed under reduced pressure. The crude compounds were purified by column chromatography using Petroleum Ether/Ethyl Acetate 95:5 as a solvents combination.

### Preparation of 1-(3-methyl-4-nitroisoxazol-5-yl)-butan-2-ol (**6a**)

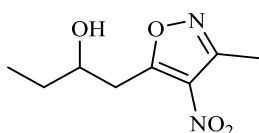

Prepared following general procedure using 3,5-dimethyl-4-nitroisoxazole **1** (5 mmol, 710 mg) and propionaldehyde **5a** (1,2 eq, 6 mmol, 348.5 mg, 430  $\mu$ l). Pale yellow oil 900 mg, 90% yield;  $R_f$  = 0.2 (Petroleum Ether/Ethyl Acetate, 90:10);  $\delta_H$  (400 MHz, CDCl<sub>3</sub>) 4.01-3.95 (m, 1H), 3.32-3.22 (m, 2H), 2.83 (bs, 1H, OH), 2.47 (s, 3H), 1.59-1.49 ppm (m, 2H), 0.94 ppm (t, 3H).  $\delta_C$  (100.6 MHz, CDCl<sub>3</sub>) 173.0, 155.6, 130.0, 70.7, 35.1, 30.3, 11.5, 9.7. HRMS:  $m/z$  found [M+H]<sup>+</sup> 201.0797, C<sub>10</sub>H<sub>17</sub>N<sub>2</sub>O<sub>3</sub> requires 201.0870.

Preparation of 1-(3-methyl-4-nitroisoxazol-5-yl)-pentan-2-ol (**6b**)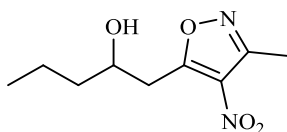

Prepared following general procedure using of 3,5-dimethyl-4-nitroisoxazole **1** (5 mmol, 710 mg) and butyraldehyde **5b** (1.2 eq, 6 mmol, 432,7 mg, 540  $\mu$ l). Yellow oil 942 mg, 88 % yield;  $R_f$  = 0.2 (Petroleum Ether/Ethyl Acetate, 90:10);  $\delta_H$  (400 MHz,  $CDCl_3$ ) 4.10 (bs, 1 H), 3.32 - 3.29 (m, 2 H), 2.51 (s, 3 H), 1.57 - 1.47 (m, 3 H), 1.45 - 1.38 (m, 1 H), 0.94 ppm (t, 3 H);  $\delta_C$  (100.6 MHz,  $CDCl_3$ ) 173.2, 155.9, 130.9, 69.5, 39.9, 35.9, 18.9, 14.1, 11.9. HRMS:  $m/z$  found  $[M+H]^+$  215.1022 requires 215.1026.

Preparation of 1-(3-methyl-4-nitroisoxazol-5-yl)-hexan-2-ol (**6c**)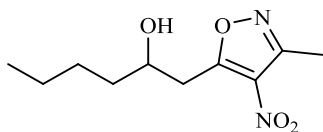

Prepared following general procedure using 3,5-dimethyl-4-nitroisoxazole **1** (5 mmol, 710 mg) and valeraldehyde **5c** (1.2 eq, 6 mmol, 517 mg, 639  $\mu$ l). Colourless oil, 1g, 88 % yield;  $R_f$  = 0.2 (Petroleum Ether/Ethyl Acetate, 90:10;  $\delta_H$  (400 MHz,  $CDCl_3$ ) 4.17-4.10 (m, 1 H), 3.39 - 3.30 (m, 2 H), 2.57 (s, 3 H), 1.72 (d, 1H) 1.61 - 1.56 (m, 2 H), 1.37 - 1.35 (m, 3 H), 0.92 (t, 3 H);  $\delta_C$  (100.6 MHz,  $CDCl_3$ ) 173.1, 156.0, 70.1, 37.7, 35.9, 27.9, 22.8, 14.3, 12.0. HRMS:  $m/z$  found  $[M+H]^+$  229.1179,  $C_{10}H_{16}N_2O_3$  requires 229.1183.

Preparation of 4-methyl-1-(3-methyl-4-nitroisoxazol-5-yl)-pentan-2-ol (**6d**)

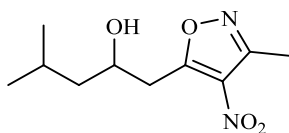

Prepared following general procedure using 3,5-dimethyl-4-nitroisoxazole **1** (5 mmol, 710 mg) and isovaleraldehyde **5d** (1.2 eq, 6 mmol, 517mg, 658  $\mu$ l). Colourless oil, 1,0 g; 92 % yield;  $R_f$  = 0.2 (Petroleum Ether/Ethyl Acetate, 90:10);  $\delta_H$  (400 MHz,  $CDCl_3$ ) 4.23-4.20 (1H, m), 3.38-3.27 (2H, m), 2.55 (3H, s), 1.88-1.76 (1H, m), 1.58-1.53 (1H, m), 1.40-1.34 (1H, m), 0.96 (3H, d,  $J$  = 7),  $\delta_C$  (100.6 MHz,  $CDCl_3$ ) 172.9, 155.8, 130.9, 68.0, 46.8, 36.1, 24.8, 23.3, 22.0, 11.8. HRMS:  $m/z$  found  $[M+H]^+$  229.1181,  $C_{10}H_{17}N_2O_3$  requires 229.1183.

Preparation of 1-(3-methyl-4-nitroisoxazol-5-yl)heptan-2-ol (**6e**)

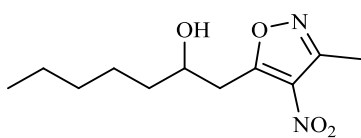

Prepared following general procedure using 3,5-dimethyl-4-nitroisoxazole **1** (5 mmol, 710 mg) and hexanal **5e** (1.2 eq, 6 mmol, 601mg, 737 $\mu$ l). Pale yellow oil 1,26 g; 87 % yield;  $R_f$  = 0.2 (Petroleum Ether/Ethyl Acetate, 90:10;  $\delta_H$  4.1-4.00 (m, 2 H), 3.37 - 3.34 (m, 2 H), 2.57 (s, 3 H), 1.63 - 1.57 (m, 3 H), 1.33 - 1.31 (m, 4 H), 0.92-0.88 (m, 4 H);  $\delta_C$  172.8, 155.7, 69.8, 37.6, 35.6, 31.6, 25.1, 22.6, 14.0, 11.7 ppm. HRMS:  $m/z$  found  $[M+H]^+$  243.1340,  $C_{11}H_{18}N_2O_4$  requires 243.1339.

Preparation of 1-(3-methyl-4-nitroisoxazol-5-yl)octan-2-ol (**6f**)

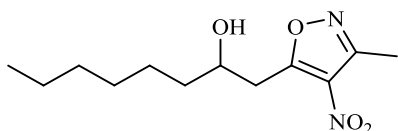

Prepared following general procedure using 3,5-dimethyl-4-nitroisoxazole **1** (5 mmol, 710 mg) and heptanal **5f** (1.2 eq, 6 mmol,

685 mg, 847 $\mu$ l). Pale yellow oil 1,13 g; 88 % yield;  $R_f = 0.2$  (Petroleum Ether/Ethyl Acetate, 90:10;  $\delta_H$  4.16-4.08 (m, 1 H), 3.38 - 3.28 (m, 2 H), 2.57 (s, 3 H), 2.06-1.99 (m, 1H), 1.59 - 1.51 (m, 2 H), 1.51 - 1.45 (m, 1 H), 1.34 - 1.30 (m, 7 H), 0.87 (t, 3 H);  $\delta_C$  173.2, 155.9, 131.0, 70.2, 37.9, 35.9, 32.0, 29.4, 25.76, 22.9, 14.3, 11.9 ppm. HRMS:  $m/z$  found  $[M+H]^+$  257.1493,  $C_{12}H_{20}N_2O_4$  requires 257.1496.

Preparation of 1-(3-methyl-4-nitroisoxazol-5-yl)nonan-2-ol (**6 g**)

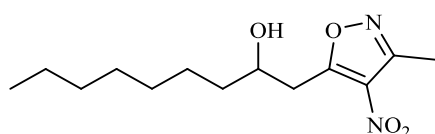

Prepared following general procedure using 3,5-dimethyl-4-nitroisoxazole **1** (5 mmol, 710 mg) and octanal **5g** (1.2 eq, 6 mmol, 769 mg, 937  $\mu$ l). Pale yellow solid; p.f.= 57-58 $^{\circ}$ C 1,37 g, 85% yield,  $\delta_H$  (400 MHz,  $CDCl_3$ ) 4.17-4.10 (m, 1H), 3.4-3.3 (m, 2H), 2.56 (s, 3H), 1.62-1.52 (m, 1H), 1.52-1.37 (m, 3H), 1.32-1.25 (m, 9 H), 0.89-0.86 (m, 3H), 173.1, 156.0, 131.1, 70.1, 37.9, 35.9, 32.1, 29.7, 29.5, 25.7, 22.9, 14.4, 11.9. HRMS:  $m/z$  found  $[M+H]^+$  271.1650,  $C_{13}H_{22}N_2O_4$ , requires 271.1652.

Preparation of 1-(3-methyl-4-nitroisoxazol-5-yl)decan-2-ol (**6 h**)

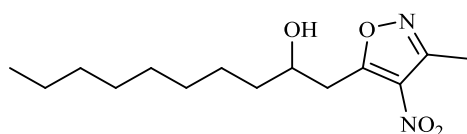

Prepared following general procedure using of 3,5-dimethyl-4-nitroisoxazole **1** (5 mmol, 710 mg) and nonanal **5h** (1.2 eq, 6 mmol, 853 mg, 1,0 ml). Pale yellow solid; p.f= 64-66 $^{\circ}$ C, 1,13 g, 83% yield;  $R_f = 0.2$  (Petroleum Ether/Ethyl Acetate, 90:10;  $\delta_H$  (400 MHz,  $CDCl_3$ ) 4.17-4.10 (m, 1H), 3.4-3.3 (m, 2H), 2.56 (s, 3H), 1.62-1.56 (m, 2H), 1.51-1.45 (m, 1H), 1.33-1.27 (m, 14 H), 0.87 (t, 3H), 172.9, 155.8, 130.9, 69.9, 37.8, 35.7, 31.9, 29.6, 29.5, 25.6,

22.8, 14.2, 11.8. HRMS:  $m/z$  found  $[M+H]^+$  285.1807,  $C_{14}H_{24}N_2O_4$  requires 285.1809.

Preparation of 1-(3-methyl-4-nitroisoxazol-5-yl)undecan-2-ol (**6i**)

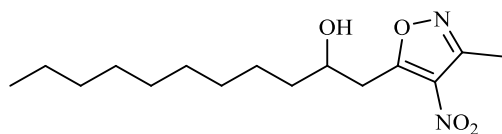

Prepared following general procedure using of 3,5-dimethyl-4-nitroisoxazole **1** (5 mmol, 710 mg) and decanal **5i** (1.2 eq, 6 mmol, 937 mg, 1.1 ml). Pale yellow solid; p.f.= 66-68°C, 1.13 g 84% yield;  $R_f$  = 0.2 (Petroleum Ether/Ethyl Acetate, 90:10;  $\delta_H$  (400 MHz,  $CDCl_3$ ) 4.14 (bs, 1H), 3.40-3.30 (m, 2H), 2.56 (s, 3H), 1.60-1.56 (m, 4H), 1.33-1.27 (m, 14 H), 0.88 (t,  $J=6.8$ , 3H), 172.9, 155.8, 130.9, 69.9, 37.8, 35.7, 31.9, 31.0, 29.6, 29.4, 25.6, 22.8, 14.2, 11.8. HRMS:  $m/z$  found  $[M+H]^+$  299.1962,  $C_{15}H_{26}N_2O_4$  requires 299.1965.

**General procedure for the synthesis of alkenethenyl isoxazole: compounds 7a-i**

In a round-bottomed flask fitted with a magnetic stirring bar and inert atmosphere, a solution of alcohol **6a-i** (1 mmol) in dry DCM (7 mL/mmol) was prepared. The solution was cooled down to 0°C and then methanesulfonyl chloride, (1.2 equivalents) was added. The mixture was allowed to stir for 30 minutes and then triethylamine (2 equivalents) was added drop wise at 0°C. The mixture was left stirring for 2 hours at RT. The reaction mixture was extracted with  $CH_2Cl_2$  (x3). The organic phase was recovered, dehydrated with  $Na_2SO_4$ , filtered off and the solvent removed under vacuum. The crude product obtained (yellow oil) was subjected to column chromatography ( $SiO_2$ , Petroleum Ether/Ethyl Acetate 97:3) to provide the desired alkene **7a-i**.

Preparation of (E)-5-(but-1-enyl)-3-methyl-4-nitroisoxazole (**7a**)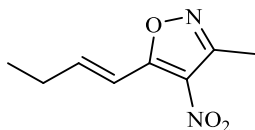

Prepared following general procedure using 1-(3-methyl-4-nitroisoxazol-5-yl)-butan-2-ol (1 mmol, 201 mg) as starting material, methanesulfonyl chloride, (137.5 mg, 93  $\mu$ l), triethylamine (203 mg, 280  $\mu$ l). Pale yellow oil 184 mg, 98% yield;  $R_f$  = 0.7 (Petroleum Ether/Ethyl Acetate, 90:10);  $\delta_H$  (400 MHz,  $CDCl_3$ ) 7.2-7.01 (m, 2H), 2.54 (s, 3H), 2.44-2.37 (m, 2H), 1.26-1.22 (m, 3H);  $\delta_C$  (100.6 MHz,  $CDCl_3$ ) 167.5, 156.2, 150.4, 113.9, 112.0, 27.1, 12.6, 12.1. HRMS:  $m/z$  found  $[M+H]^+$  183.0762,  $C_8H_{10}N_2O_3$  requires 183.0764

Preparation of (E)-3-methyl-4-nitro-5-(pent-1-enyl)isoxazole (**7b**)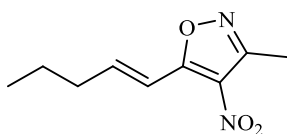

Prepared following general procedure using 1-(3-methyl-4-nitroisoxazol-5-yl)-pentan-2-ol (1 mmol, 214.2 mg) as starting material, methanesulfonyl chloride, (137.5 mg, 93  $\mu$ l), triethylamine (203 mg, 280  $\mu$ l). Pale yellow oil 188 mg, 96% yield;  $R_f$  = 0.7 (Petroleum Ether/Ethyl Acetate, 90:10);  $\delta_H$  (400 MHz,  $CDCl_3$ ) 7.09-7.01 (m, 2H), 2.56 (s, 3H), 2.39-2.34 (m, 2H), 1.63-1.54 (m, 2H), 0.99 (t, 3H);  $\delta_C$  (100.6 MHz,  $CDCl_3$ ) 167.1, 156.0, 148.8, 114.8, 113.1, 35.8, 21.6, 13.8, 11.9. HRMS:  $m/z$  found  $[M+H]^+$  197.0920,  $C_9H_{12}N_2O_3$  requires 197.0921.

Preparation of (E)-5-(hex-1-enyl)-3-methyl-4-nitroisoxazole (**7c**)



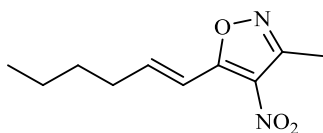

Prepared following general procedure using (1 mmol, 228.2 mg) 1-(3-methyl-4-nitroisoxazol-5-yl)-hexan-2-ol as starting material, methanesulfonyl chloride, (137.5 mg, 93  $\mu$ l), triethylamine (203 mg, 280  $\mu$ l). Pale yellow oil 202 mg, 97% yield;  $R_f$  = 0.7 (Petroleum Ether/Ethyl Acetate, 90:10);  $\delta_H$  (400 MHz,  $CDCl_3$ ) 7.13-7.01 (m, 2H), 2.56 (s, 3H), 2.41-2.36 (m, 2H), 1.57-1.49 (m, 2H), 1.44-1.35 (m, 2H), 0.94 (3H, t);  $\delta_C$  (100.6 MHz,  $CDCl_3$ ) 167.4, 156.3, 149.4, 114.8, 113.2, 33.8, 30.6, 22.6, 14.2, 12.2. HRMS:  $m/z$  found  $[M+H]^+$  211.0977,  $C_{10}H_{14}N_2O_3$  requires 211.1077.

Preparation of (E)-3-methyl-5-(4-methylpent-1-enyl)-4-nitroisoxazole (**7d**)

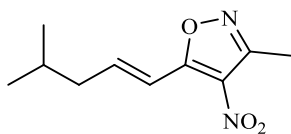

Prepared following general procedure using 4-methyl-1-(3-methyl-4-nitroisoxazol-5-yl)-pentan-2-ol (1 mmol, 228.2 mg) as starting material, methanesulfonyl chloride, (137.5 mg, 93  $\mu$ l), triethylamine (203 mg, 280  $\mu$ l). Pale yellow oil 199 mg, 95% yield;  $R_f$  = 0.7 (Petroleum Ether/Ethyl Acetate, 90:10);  $^1H$  NMR (400 MHz,  $CDCl_3$ ):  $\delta_H$  7.12-7.00 (m, 2H), 2.55 (s, 3H), 2.27 (t, 2H,  $J$  = 6) 1.89-1.82 (m, 1H), 0.97 (d, 6H,  $J$  = 7),  $\delta_C$  (100.6 MHz,  $CDCl_3$ ) 166.9 155.9, 147.9, 115.4, 113.2, 42.9, 39.7, 28.7, 22.4, 11.8, HRMS found:  $[M-H^+]$  211.1074,  $C_{10}H_{14}N_2O_3$  requires 211.1077.

Preparation of (E)-5-(hept-1-enyl)-3-methyl-4-nitroisoxazole (**7e**)

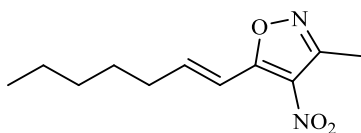

Prepared following general procedure using (1 mmol, 242.3 mg) 1-(3-methyl-4-nitroisoxazol-5-yl)-heptan-2-ol as starting material, methanesulfonyl chloride, (137.5 mg, 93  $\mu$ l), triethylamine (203 mg, 280  $\mu$ l). Pale yellow oil 215 mg, 96% yield;  $R_f$  = 0.7 (Petroleum Ether/Ethyl Acetate, 90:10);  $\delta_H$  (400 MHz,  $CDCl_3$ ) 7.14-7.01 (m, 2H), 2.58 (s, 3H), 2.41-2.33 (m, 2H), 1.57-1.53 (m, 2H), 1.36-1.25 (m, 4H), 0.91 (t, 3H);  $\delta_C$  (100.6 MHz,  $CDCl_3$ ) 167.4, 156.3, 149.4, 114.8, 113.2, 34.0, 31.7, 28.2, 22.8, 14.3, 12.2. HRMS:  $m/z$  found  $[M+H]^+$  225.1231,  $C_{11}H_{16}N_2O_3$  requires 225.1234.

Preparation of (E)-3-methyl-4-nitro-5-(oct-1-enyl)isoxazole (**7f**)

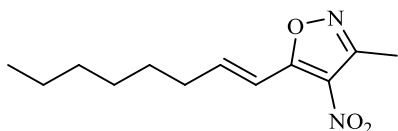

Prepared following general procedure using (1 mmol, 256.3 mg) 1-(3-methyl-4-nitroisoxazol-5-yl)octan-2-ol as starting material, methanesulfonyl chloride, (137.5 mg, 93  $\mu$ l), triethylamine (203 mg, 280  $\mu$ l). Pale yellow oil 223 mg, 94% yield;  $R_f$  = 0.7 (Petroleum Ether/Ethyl Acetate, 90:10);  $\delta_H$  (400 MHz,  $CDCl_3$ ) 7.1-6.99 (m, 2H), 2.54 (s, 3H), 2.39-2.34 (m, 2H), 1.56-1.49 (m, 2H), 1.35-1.23 (m, 6H), 0.88 (t, 3H);  $\delta_C$  (100.6 MHz,  $CDCl_3$ ) 167.1, 155.9, 149.0, 114.5, 112.5, 33.8, 31.6, 28.9, 28.2, 22.6, 14.1, 11.8. HRMS:  $m/z$  found  $[M+H]^+$  239.1380,  $C_{12}H_{18}N_2O_3$  requires 239.1390.

Preparation of (E)-3-methyl-4-nitro-5-(non-1-enyl)isoxazole (**7g**)

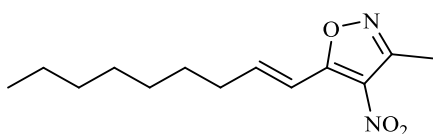

Prepared following general procedure using (1 mmol, 270.3 mg) 1-(3-methyl-4-nitroisoxazol-5-yl)nonan-2-ol as starting material, methanesulfonyl chloride, (137.5 mg, 93  $\mu$ l), triethylamine (203 mg, 280  $\mu$ l). Pale yellow oil 227 mg, 90% yield;  $R_f$  = 0.7 (Petroleum Ether/Ethyl Acetate, 90:10);  $\delta_H$  (400 MHz,  $CDCl_3$ ) 7.13-6.96 (m, 2H), 2.56 (s, 3H), 2.40-2.35 (m, 2H), 1.55-1.50 (m, 2H), 1.37-1.24 (m, 8H), 0.90-0.87(m, 3H);  $\delta_C$  (100.6 MHz,  $CDCl_3$ ) 167.2, 156.0, 149.2, 127.3, 114.6, 33.9, 31.9, 29.3, 28.3, 22.8, 14.2. HRMS:  $m/z$  found  $[M+H]^+$  253.1542,  $C_{13}H_{20}N_2O_3$  requires 253.1547.

Preparation of (E)-5-(dec-1-enyl)-3-methyl-4-nitroisoxazole (**7h**)

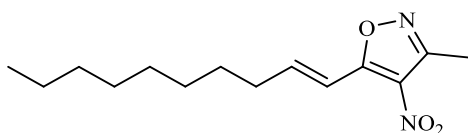

Prepared following general procedure using (1 mmol, 284.4 mg) 1-(3-methyl-4-nitroisoxazol-5-yl)decan-2-ol as starting material, methanesulfonyl chloride, (137.5 mg, 93  $\mu$ l), triethylamine (203 mg, 280  $\mu$ l). Pale yellow oil 234 mg, 88% yield;  $R_f$  = 0.7 (Petroleum Ether/Ethyl Acetate, 90:10);  $\delta_H$  (400 MHz,  $CDCl_3$ ) 7.13-7.00 (m, 2H), 2.55(s, 3H), 2.40-2.35(m, 2H), 1.57-1.48 (m, 2H), 1.37-1.27(m, 10H), 0.87(t, 3H);  $\delta_C$  (100.0 MHz,  $CDCl_3$ ) 167.2, 156.0, 149.2, 127.3, 114.6, 33.9, 31.9, 29.5, 29.3, 28.3, 22.8, 14.2, 11.9. HRMS:  $m/z$  found  $[M+H]^+$  267.1602,  $C_{14}H_{22}N_2O_3$  requires 267.1703.

Preparation of (E)-3-methyl-4-nitro-5-(undec-1-enyl)isoxazole (**7i**)

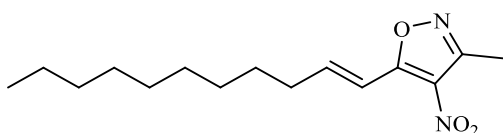

Prepared following general procedure using (1 mmol, 298.4 mg) 1-(3-methyl-4-nitroisoxazol-5-yl)octan-2-ol as starting material, methanesulfonyl chloride, (137.5 mg, 93  $\mu$ l), triethylamine (203

mg, 280  $\mu$ l). Pale yellow oil 246 mg, 88% yield;  $R_f = 0.7$  (Petroleum Ether/Ethyl Acetate, 90:10);  $\delta_H$  (400 MHz,  $CDCl_3$ ) 7.14-7.01 (m, 2H), 2.56 (s, 3H), 2.41-2.36 (m, 2H), 1.55-1.50 (m, 2H), 1.48-1.24 (m, 12H), 0.88 (3H, t,  $J=7.2$  Hz);  $\delta_C$  (100.6 MHz,  $CDCl_3$ ) 167.2, 156.0, 149.5, 114.8, 112.5, 34.1, 32.2, 29.8, 29.7, 29.6, 29.5, 28.5, 22.8, 14.5, 12.2. HRMS:  $m/z$  found  $[M+H]^+$  281.1855,  $C_{15}H_{24}N_2O_3$  requires 281.1860.

**Procedure for the enantioselective Michael addition of nitromethane to compound 7d (Optimization, Table 3)**

In a test tube equipped with a magnetic stirring bar were sequentially added the aliphatic styryl isoxazole (0.1 mmol), catalyst **8-8.5** (10 mol%), nitromethane (0.5 mmol) and toluene (1 mL). The test tube was placed at 0°C, then finely ground  $K_2CO_3$  (0.5 mmol) was added in one portion. The mixture was then vigorously stirred at the same temperature, with no precautions to exclude moisture or air. After 72 h, the reaction was quenched with sat  $NH_4Cl$  (10 mL), extracted with toluene (2 x 5 mL), dried over  $MgSO_4$ , filtered over celite and evaporated to give pure compound **9d** in the reported yields and enantiomeric excess.

**General Procedure for generation of nitroadducts 9 a-i (Reaction scope-Table 4)**

In a test tube fitted with a magnetic stirring bar a solution of the alkene **7a-i** (0.2 mmol) in toluene (6.7 mL, 0.03 M) was prepared. To this solution, the catalyst **8**, (0.02 mmol, 12 mg) and nitromethane (54  $\mu$ L, 61 mg, 1 mmol) were added. Then, the mixture was left stirring for 5 minutes. The potassium carbonate (138 mg, 1 mmol) was added at 0°C. The mixture was left stirring for the stated time. The reaction mixture was treated with a saturated

solution of  $\text{NH}_4\text{Cl}$  until  $\text{pH} = 3$  and extracted with toluene ( $\times 3$ ). The organic phase was recovered and dehydrated with  $\text{MgSO}_4$ . Then, it was filtered and the solvent was evaporated under vacuum. The crude oils obtained were subjected to column chromatography ( $\text{SiO}_2$ , Petroleum Ether/Ethyl acetate 95:5) to provide the desired nitro-adducts **9a-i** in the reported yield and enantiomeric excess.

(R)-3-methyl-4-nitro-5-(2-(nitromethyl)butyl)isoxazole (**9a**)

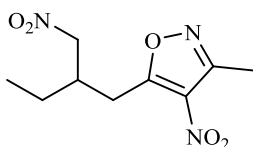

Prepared following general procedure using (E)-5-(but-1-enyl)-3-methyl-4-nitroisoxazole (36.4 mg, 0.2 mmol) and catalyst **8**. Reaction time: 48 h. After work up and purification compound **9a** was obtained as a yellow oil (44 mg, 91% yield). The ee of the product was determined by CSP-HPLC using a Chiralcel OD column (*n*-hexane/*i*-PrOH 90:10, flow rate 1 mL/min,  $t_{\text{maj}} = 23.8$  min,  $t_{\text{min}} = 29.1$  min, 93% ee);  $R_f = 0.6$  (Petroleum Ether/Ethyl Acetate, 80:20;  $[\alpha]_{20}^D = -3.5$  ( $c$  0.7, MeOH);  $\delta_{\text{H}}$  (400 MHz,  $\text{CDCl}_3$ ) 4.48-4.39 (m, 2H), 3.36 (dd, 2H,  $J = 6.8$ ;  $J = 15.2$ ), 3.29 (dd, 2H,  $J = 7.2$ ;  $J = 15.2$ ), 2.78-2.72 (m, 1H), 2.56 (s, 3H), 1.55-1.48 (m, 2H), 1.01 (t, 3H),  $\delta_{\text{C}}$  (100.6 MHz,  $\text{CDCl}_3$ ) 172.1, 155.9, 130.3, 77.9, 37.2, 29.4, 24.5, 11.6, 10.6. HRMS found:  $[\text{M}-\text{H}^+]$  244.0926,  $\text{C}_9\text{H}_{13}\text{N}_3\text{O}_5$  requires 244.0928.

(R)-3-methyl-4-nitro-5-(2-(nitromethyl)pentyl)isoxazole (**9b**)

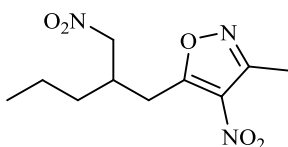

Prepared following general procedure using (E)-5-(but-1-enyl)-3-methyl-4-nitroisoxazole (39.3 mg, 0.2 mmol) and catalyst **8**.

Reaction time: 48 h. After work up and purification compound **9b** was obtained as a yellow oil (47 mg, 91% yield). The ee of the product was determined by CSP-HPLC using a Chiralcel OD column (*n*-hexane/*i*-PrOH 90:10, flow rate 1 mL/min,  $t_{\text{maj}} = 19.1$  min,  $t_{\text{min}} = 23.1$  min, 87% ee);  $R_f = 0.6$  (Petroleum Ether/Ethyl Acetate, 80:20;  $[\alpha]_{20}^D = -11.0$  (c 1.8, MeOH);  $\delta_H$  (400 MHz, CDCl<sub>3</sub>) 4.47-4.39 (m, 2H), 3.37 (dd, 1H,  $J = 6.8$ ;  $J = 15.2$ ), 3.30 (dd, 1H,  $J = 7.2$ ;  $J = 15.2$ ), 2.86-2.79 (m, 1H), 2.57 (s, 3H), 1.47-1.38 (m, 4H), 0.93 (t, 3H),  $\delta_C$  (100.6 MHz, CDCl<sub>3</sub>) 172.3, 156.0, 130.3, 78.4, 36.5, 35.8, 32.2, 19.6, 13.9, 11.8. HRMS:  $m/z$  found  $[M+H]^+$  342.1951. HRMS found:  $[M-H]^+$  258.1080, C<sub>10</sub>H<sub>15</sub>N<sub>3</sub>O<sub>5</sub> requires 258.1084.

(R)-3-methyl-4-nitro-5-(2-(nitromethyl)hexyl)isoxazole (**9c**)

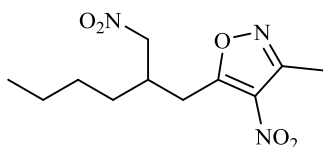

Prepared following general procedure using (E)-5-(but-1-enyl)-3-methyl-4-nitroisoxazole (42 mg, 0.2 mmol). Reaction time: 48 h. After work up and purification compound was obtained **9c** as a yellow oil (49 mg, 90% yield). The ee of the product was determined by CSP-HPLC using a Chiralpack AD column (*n*-hexane/*i*-PrOH 98:2, flow rate 0.75 mL/min,  $t_{\text{maj}} = 21$  min,  $t_{\text{min}} = 24$  min, 88% ee);  $R_f = 0.6$  (Petroleum Ether/Ethyl Acetate, 80:20;  $[\alpha]_{20}^D = -6.0$  (c 1.0, MeOH);  $\delta_H$  (400 MHz, CDCl<sub>3</sub>) 4.43-4.41 (m, 2H) 3.39-3.26 (m, 2H) 2.83-2.69 (m, 1H), 2.56 (3H, s), 1.47-1.33 (m, 6H), 0.9 (t, 3H),  $\delta_C$  (100.6 MHz, CDCl<sub>3</sub>) 172.1, 156.1, 130.3, 78.4, 33.8, 29.5, 27.9, 22.8, 14.3, 11.6. HRMS:  $m/z$  found  $[M+H]^+$  272.1199, C<sub>11</sub>H<sub>17</sub>N<sub>3</sub>O<sub>5</sub> requires 272.1241.

(R)-3-methyl-5-(4-methyl-2-(nitromethyl)pentyl)-4-nitroisoxazole  
(**9d**)

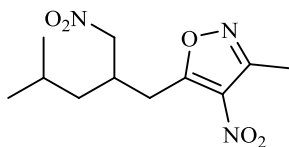

Prepared following general procedure using (E)-3methyl-5-(4-methylpent-1-enyl)-4nitroisoxazole (42 mg, 0.2 mmol). Reaction time: 48 h. After work up and purification compound was obtained **9d** as a yellow oil (48 mg, 90% yield). The ee of the product was determined by CSP-HPLC using a Chiralcel OD column (*n*-hexane/*i*-PrOH 95:5, flow rate 1 mL/min,  $t_{\text{maj}}$  = 19 min,  $t_{\text{min}}$  = 24 min, 89% ee);  $R_f$  = 0.6 (Petroleum Ether/Ethyl Acetate, 80:20;  $[\alpha]_{20}^D$  = -6.0 (c 1.0, MeOH);  $\delta_H$  (400 MHz,  $\text{CDCl}_3$ ) 4.38 (d, 2H,  $J$  = 6), 3.35 (dd, 1H,  $J$  = 15,  $J$  = 6), 3.28 (dd, 1H,  $J$  = 15,  $J$  = 7), 2.87 (sept, 1H,  $J$  = 7), 2.56 (s, 3H), 1.68 (sept, 1H,  $J$  = 7), 1.36-1.23 (m, 2H), 0.92 (d, 3H,  $J$  = 4), 0.90 (d, 3H,  $J$  = 4),  $\delta_C$  (100.6 MHz,  $\text{CDCl}_3$ ) 172.1, 155.6, 122.9, 78.5, 40.9, 33.9, 30.0, 25.1, 22.4, 22.3, 11.7. HRMS:  $m/z$  found  $[\text{M}+\text{H}]^+$  272.1212,  $\text{C}_{11}\text{H}_{18}\text{N}_3\text{O}_5$  requires 272.1241.

(R)-3-methyl-4-nitro-5-(2-(nitromethyl)heptyl)isoxazole  
(**9e**)

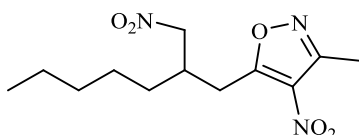

Prepared following general procedure using (E)-5-(hept-1-enyl)-3-methyl-4-nitroisoxazole (45 mg, 0.2 mmol) and catalyst **8**. Reaction time: 60 h. After work up and purification compound **9e** was as a yellow oil (52 mg, 91% yield). The ee of the product was

determined by CSP-HPLC using a Chiralpack AD column (*n*-hexane/*i*-PrOH 98:2, flow rate 0.75 mL/min,  $t_{\text{maj}} = 21.3$  min,  $t_{\text{min}} = 27.2$  min, 88% ee);  $R_f = 0.6$  (Petroleum Ether/Ethyl Acetate, 80:20;  $[\alpha]_{20}^D = -20.0$  (c 3.3, MeOH);  $\delta_{\text{H}}$  (400 MHz, CDCl<sub>3</sub>) 4.45-4.41 (m, 2H), 3.33 (dd, 1H,  $J = 6.8$ ;  $J = 15.2$ ), 3.29 (dd, 1H,  $J = 7.2$ ;  $J = 15.2$ ), 2.83-2.77 (m, 1H), 2.56 (s, 3H), 1.46-1.35 (m, 4H), 1.29-1.26 (m, 4H), 0.87 (t, 3H,  $J = 7.2$ ),  $\delta_{\text{C}}$  (100.6 MHz, CDCl<sub>3</sub>) 172.3, 155.9, 128.8, 78.3, 35.9, 31.6, 31.5, 29.8, 25.9, 22.4, 14.0, 11.8. HRMS:  $m/z$  found:  $[M-H]^+$  286.1299, C<sub>12</sub>H<sub>19</sub>N<sub>3</sub>O<sub>5</sub> requires 286.1397.

(R)-3-methyl-4-nitro-5-(2-(nitromethyl)octyl)isoxazole (**9f**)

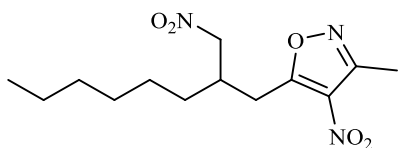

Prepared following general procedure using (E)-5-(hept-1-enyl)-3-methyl-4-nitroisoxazole (47.6 mg, 0.2 mmol) and catalyst **8**. Reaction time: 60 h. After work up and purification compound **9f** was as a pale yellow oil (54 mg, 90% yield). The ee of the product was determined by CSP-HPLC using a Chiralpack AD column (*n*-hexane/*i*-PrOH 98:2, flow rate 0.75 mL/min,  $t_{\text{maj}} = 22.9$  min,  $t_{\text{min}} = 26.0$  min, 86% ee);  $R_f = 0.6$  (Petroleum Ether/Ethyl Acetate, 80:20;  $[\alpha]_{20}^D = -10.0$  (c 1.6, MeOH);  $\delta_{\text{H}}$  (400 MHz, CDCl<sub>3</sub>) 4.44-4.36 (m, 2H), 3.31 (1H, dd,  $J = 6.8$ ;  $J = 15.2$ ), 3.28 (1H, dd,  $J = 7.2$ ;  $J = 15.2$ ), 2.82-2.75 (m, 1H), 2.55 (s, 3H), 1.50-1.40 (m, 4H), 1.37-1.22 (m, 6H), 0.86 (t, 3H),  $\delta_{\text{C}}$  (100.6 MHz, CDCl<sub>3</sub>) 172.3, 155.9, 130.8, 78.4, 36.0, 31.6, 31.7, 31.6, 29.9, 29.0, 26.3, 22.6, 14.1, 11.8. HRMS:  $m/z$  found  $[M+H]^+$  300.1549 C<sub>13</sub>H<sub>21</sub>N<sub>3</sub>O<sub>5</sub> requires 300.1554.



(R)-3-methyl-4-nitro-5-(2-(nitromethyl)nonyl)isoxazole (**9g**)

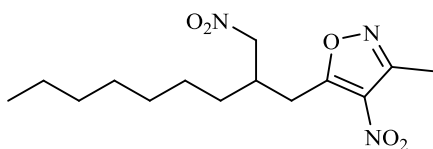

Prepared following general procedure using (E)-3-methyl-4-nitro-5-(non-1-enyl)isoxazole (50 mg, 0.2 mmol) and catalyst **8**. Reaction time: 60 h. After work up and purification compound **9g** was obtained as a pale yellow oil (63 mg, 99% yield). The ee of the product was determined by CSP-HPLC using a Chiralpak AD column (*n*-hexane/*i*-PrOH 99:1, flow rate 0.75 mL/min,  $t_{\text{maj}} = 24.3$  min,  $t_{\text{min}} = 26.02$  min, 83% ee);  $R_f = 0.6$  (Petroleum Ether/Ethyl Acetate, 80:20;  $[\alpha]_{20}^D = -15.0$  (c 2.5, MeOH);  $\delta_H$  (400 MHz,  $\text{CDCl}_3$ ) 4.47-4.39 (m, 2H), 3.37 (dd, 1H,  $J = 6.4$ ;  $J = 15.2$ ), 3.31 (dd, 1H,  $J = 8$ ;  $J = 15.6$ ), 2.84-2.78 (m, 1H), 2.58 (s, 3H), 1.49-1.43 (m, 2H), 1.40-1.36 (m, 2H), 1.33-1.27 (m, 8H), 0.88 (t, 3H,  $J = 6.8$ ), 172.3, 156.0, 129.2, 78.4, 36.0, 31.8, 31.7, 29.9, 29.4, 29.1, 26.3, 22.7, 14.2, 11.8. HRMS:  $m/z$   $[\text{M}-\text{H}^+]$  found: 314.1699,  $\text{C}_{14}\text{H}_{23}\text{N}_3\text{O}_5$  requires 314.1710.

(R)-3-methyl-4-nitro-5-(2-(nitromethyl)decyl)isoxazole (**9h**)

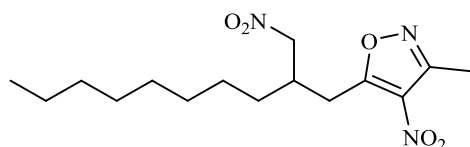

Prepared following general procedure using (E)-5-(dec-1-enyl)-3-methyl-4-nitroisoxazole (53 mg, 0.2 mmol) and catalyst **8**. Reaction time: 72 h. After work up and purification compound **9h** was obtained as a pale yellow oil (58 mg, 89% yield). The ee of the product was determined by CSP-HPLC using a Chiralcel OD column (*n*-hexane/*i*-PrOH 95:5, flow rate 0.75 mL/min,  $t_{\text{maj}} = 25.3$  min,  $t_{\text{min}} = 32.2$  min, 87% ee);  $R_f = 0.6$  (Petroleum Ether/Ethyl Acetate, 80:20;  $[\alpha]_{20}^D = -9.0$  (c 1.5, MeOH);  $\delta_H$  (400 MHz,  $\text{CDCl}_3$ )

4.46-4.39 (m, 2H), 3.37 (1H, dd,  $J = 6.8$ ;  $J = 15.2$ ), 3.31 (1H, dd,  $J = 7.2$ ;  $J = 15.2$ ), 2.84-2.78 (m, 1H), 2.58 (s, 3H), 1.48-1.43 (m, 2H), 1.39-1.37 (m, 2H), 1.35-1.26 (m, 10H), 0.87 (t, 3H,  $J = 4$ ), 172.3, 156.0, 78.4, 36.0, 31.9, 31.7, 29.9, 29.8, 29.4, 26.3, 22.8, 14.2, 11.8. HRMS:  $m/z$  found  $[M+H]^+$  328.1850  $C_{15}H_{25}N_3O_5$  requires 328.1867.

(R)-3-methyl-4-nitro-5-(nitromethyl)undecyl)isoxazole (**9i**)

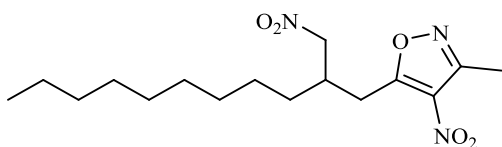

Prepared following general procedure using (E)-3-methyl-4-nitro-5-(undec-1-enyl)isoxazole (56 mg, 0.2 mmol) and catalyst **8**. Reaction time: 72 h. After work up and purification compound **9i** was obtained as a pale yellow oil (61 mg, 89% yield). The ee of the product was determined by CSP-HPLC using a Chiralpak OD column (*n*-hexane/*i*-PrOH 95:5, flow rate 0.75 mL/min,  $t_{maj} = 23.6$  min,  $t_{min} = 29.09$  min, 85% ee);  $R_f = 0.6$  (Petroleum Ether/Ethyl Acetate, 80:20);  $[\alpha]_{20}^D = -18.0$  (c 3.2, EtOH);  $\delta_H$  (400 MHz,  $CDCl_3$ ) 4.45-4.36 (m, 2H), 3.34 (dd, 1H,  $J = 6.8$ ;  $J = 15.6$ ), 3.27 (dd, 1H,  $J = 7.2$ ;  $J = 15.2$ ), 2.81-2.75 (m, 1H), 2.55 (s, 3H), 1.46-1.32 (m, 16H), 0.85 (t, 3H,  $J = 7$ ), 172.2, 155.8, 78.2, 35.9, 31.8, 31.6, 29.7, 29.4, 29.3, 29.2, 26.1, 22.6, 14.0, 11.6. HRMS:  $m/z$  found  $[M+H]^+$  342.1951.

### General procedure for the catalysts 8-8.5

To a stirred suspension of cinchonidine (1.0 mmol) in THF (3.0 mL), the corresponding benzyl bromide (1.3 mmol) was added. The resulting mixture was then heated at 60°C, and stirred for 36h at

the same temperature. After cooling to rt, the precipitate was collected by Büchner filtration and washed several times with Et<sub>2</sub>O, affording the title compound. All the catalysts have been synthesized using procedure already described in literature.

***N*-3,5-Bis(*tert*-butylbenzyl)cinchonidinium bromide (8)**

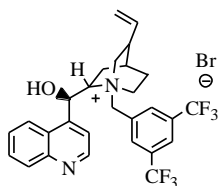

To a stirred suspension of cinchonidine (1.0 mmol) in THF (3.0 mL), 3,5-bis(trifluoromethyl)benzyl bromide (1.3 mmol) was added. The resulting mixture was then heated at 60°C, and stirred for 36h at the same temperature. After cooling to rt, the precipitate was collected by Büchner filtration and washed several times with Et<sub>2</sub>O, affording the title compound as a white solid in 80% yield

$[\alpha]_D^{25} = -105.5$  ( $c = 0.80$ , CHCl<sub>3</sub>) <sup>1</sup>H NMR (CDCl<sub>3</sub>, 400 MHz)  $\delta$  8.86 (d,  $J = 4.4$ , 1H), 8.12–8.10 (m, 1H), 7.98 (d,  $J = 8$ , 1H), 7.82–7.81 (m, 1H), 7.69 (d,  $J = 1.6$ , 2H), 7.66–7.58 (m, 2H), 7.51 (s, 1H), 6.76–6.68 (m, 2H), 5.90–5.87 (m, 1H), 5.60–5.52 (m, 1H), 5.13–5.09 (m, 2H), 5.02 (d,  $J = 10.4$ , 1H), 4.92–4.88 (b, 1H), 3.79 (t,  $J = 8.4$ , 1H), 3.68–3.62 (m, 1H), 3.49–3.43 (b, 1H), 3.33–3.31 (b, 1H), 2.63 (b, 1H), 2.17–2.12 (b, 2H), 1.99 (s, 1H), 1.67 (b, 1H), 1.33 (s, 18H); <sup>13</sup>C NMR (CDCl<sub>3</sub>, 100.6 MHz)  $\delta$  152.2, 149.5, 147.2, 145.9, 136.5, 129.8, 129.6, 128.3, 127.9, 126.3, 124.8, 124.4, 123.0, 120.2, 117.9, 68.5, 64.6, 63.8, 61.3, 51.6, 38.0, 35.1, 31.47, 26.7, 24.9, 21.7.



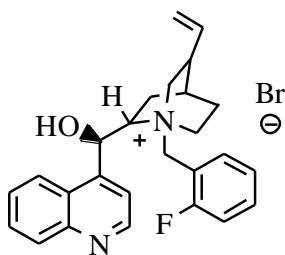

$^1\text{H}$  NMR (300 MHz,  $\text{CDCl}_3$ )  $\delta$  8.94 (d,  $J = 4.6$  Hz, 1H), 8.32 (d,  $J = 7.4$  Hz, 1H), 8.16 (d,  $J = 8.4$  Hz, 1H), 7.93–7.76 (m, 5H), 7.43 (t,  $J = 8.8$  Hz, 2H), 6.82–6.73 (m, 1H), 6.52 (bs, 1H), 6.08–5.96 (m, 1H), 5.33–5.16 (m, 2H), 5.12–4.98 (m, 1H), 4.89–4.79 (m, 1H), 4.25–4.17 (m, 1H), 3.91 (t,  $J = 9.5$  Hz, 2H), 3.46 (t,  $J = 11.4$  Hz, 1H), 2.95 (dd,  $J = 20.9, 10.0$  Hz, 1H), 2.69–2.61 (m, 1H), 2.44–2.31 (m, 1H), 1.91 (bs, 1H), 1.86–1.73 (m, 2H), 1.24–1.11 (m, 1H).

All the catalysts have been synthesized using procedure already described in literature.

#### General procedure for the synthesis of nitroacids

A solution of adducts (**9 a, c, d, e, f, i**), (0.25 mmol) in THF (0.5 mL) was charged in a round bottomed flask and treated with an aqueous solution of NaOH (1N, 1.25 mL, 5 equiv.). The resulting deep yellow solution was refluxed for 6h, then allowed to reach room temperature, the THF was evaporated in *vacuo*; to the aqueous solution ethyl acetate was added and the mixture brought to 0°C. The pH was adjusted to 3 by slow addition of 3N aqueous HCl. The mixture was extracted three times with ethylacetate, dried over  $\text{Na}_2\text{SO}_4$  and the solvent removed under vacuum. Compounds **10 a, c, d, e, f, i** were obtained as a yellow oil in reported yields.

Preparation of (R)-3-methyl-4-pentanoic acid (**10a**)

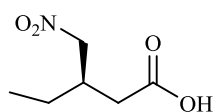

Prepared following general procedure using **9a** (0.25 mmol, 61mg) in THF (0.5 mL) treated with an aqueous solution of NaOH (1N, 1.25 mL, 5 equiv.) The crude mixture was submitted to column chromatography 8/2 Petroleum spirit/ Ethyl acetate and compound **10a** was obtained as pale yellow oil 37 mg, 92% yield;  $R_f = 0.5$  (Petroleum Ether/Ethyl Acetate, 3:7),  $^1\text{H}$  NMR (400 MHz,  $\text{CDCl}_3$ )  $\delta_{\text{H}}$  4.50 (dd, 1H,  $J = 6, J = 12.4$ ), 4.46 (dd, 1H,  $J = 5.6, J = 12.4$ ), 2.60-2.54 (m, 1H), 2.51 (d, 2H,  $J = 6.4$ ), 1.54-1.47 (m, 2H), 0.99 (t, 3H,  $J = 7.2$ ),  $^{13}\text{C}$  (100.6 MHz,  $\text{CDCl}_3$ )  $\delta_{\text{C}}$  177.2, 78.2, 35.5, 35.3, 24.4, 10.9. HRMS found:  $[\text{M}-\text{H}]^-$  160.0611,  $\text{C}_6\text{H}_{11}\text{NO}_4$  requires 160.0615.

Preparation of (R)-3-(nitromethyl) heptanoic acid (**10c**)

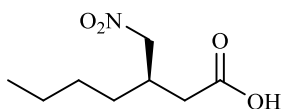

Prepared following general procedure using **9c** (0.25 mmol, 68 mg) in THF (0.5 mL) treated with an aqueous solution of NaOH (1N, 1.25 mL, 5 equiv.) The crude mixture was submitted to column chromatography 8/2 Petroleum spirit/ Ethyl acetate and compound **10c** was obtained as pale yellow oil 34 mg, 90% yield;  $R_f = 0.5$  (Petroleum Ether/Ethyl Acetate, 3:7);  $^1\text{H}$  NMR (400 MHz,  $\text{CDCl}_3$ )  $\delta_{\text{H}}$  4.51 (dd,  $J = 6, J = 12.4$ , 1H), 4.46 (dd,  $J = 6.4, J = 12$ , 1H), 2.65-2.59 (m, 1H), 2.51 (d,  $J = 6.4$ , 2H), 1.47-1.42 (m, 2H), 1.34-1.32 (m, 4H), 0.92-0.88 (m, 3H),  $^{13}\text{C}$  (100.6 MHz,  $\text{CDCl}_3$ )  $\delta_{\text{C}}$  176.6, 78.7, 35.5, 34.1, 31.1, 28.6, 22.6, 13.9. HRMS found:  $[\text{M}-\text{H}]^-$  188.0925,  $\text{C}_8\text{H}_{15}\text{NO}_4$  requires 188.0928.

Preparation of (R)-5-methyl-3-(nitromethyl)hexanoic acid (**10d**)

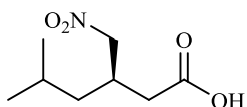

Prepared following general procedure using **9 d** (0.25 mmol, 68mg) in THF (0.5 mL) treated with an aqueous solution of NaOH (1N, 1,25 mL, 5 equiv.) The crude mixture was submitted to column chromatography 8/2 Petroleum spirit/ Ethyl acetate and compound **10d** was obtained as yellow oil 44 mg, 94% yield;  $R_f = 0.5$  (Petroleum Ether/Ethyl Acetate, 3:7);  $^1\text{H}$  NMR (400 MHz, MeOD)  $\delta_{\text{H}}$  9,27 (bs, 1H, OH), 4.46 (dd,  $J = 6.4$ ,  $J = 12.4$ , 1H), 4.40 (dd,  $J = 5.6$ ,  $J = 12.4$ , 1H), 2.67-2.61 (m, 1H), 2.46 (d,  $J = 6.4$ , 2H) 1.65-1.59 (m, 1H), 1.26-1.19 (m, 2H), 0.89-0.86 (m, 6H),  $^{13}\text{C}$  (100.6 MHz, MeOD)  $\delta_{\text{C}}$  177.1, 78.7, 40.5, 35.7, 31.9, 25.1, 22.5, 22.3, HRMS found:  $[\text{M-H}]^-$  188.0924,  $\text{C}_8\text{H}_{15}\text{NO}_4$  requires 188.0928.

Preparation of (R)-3-(nitromethyl) octanoic acid (**10e**)

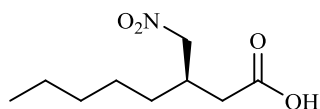

Prepared following general procedure using **9e** (0.25 mmol, 71 mg) in THF (0,5 mL) treated with an aqueous solution of NaOH (1N, 1,25 mL, 5 equiv.) The crude mixture was submitted to column chromatography 8/2 Petroleum spirit/ Ethyl acetate and compound **10e** was obtained as yellow oil 44 mg, 88% yield;  $R_f = 0.5$  (Petroleum Ether/Ethyl Acetate, 3:7),  $^1\text{H}$  NMR (400 MHz,  $\text{CDCl}_3$ )  $\delta_{\text{H}}$  4.51 (dd,  $J = 6.4$ ,  $J = 12.4$ , 1H), 4.46 (dd,  $J = 6$ ,  $J = 12.4$ , 1H), 2.66-2.59 (m, 1H) 2.51 (d, 2H,  $J=6.4$ ), 1.44-1.40 (m, 2H), 1.33-1.27 (m, 6H), 0.89-0.86 (m, 3H),  $^{13}\text{C}$  (100.6 MHz,  $\text{CDCl}_3$ )  $\delta_{\text{C}}$  176.7, 78.5, 35.5, 34.1, 31.5, 29.1, 26.5, 22.7, 14.1. HRMS found:  $[\text{M-H}]^-$  202.1081,  $\text{C}_9\text{H}_{17}\text{NO}_4$  requires 202.1085.

Preparation of (R)-3-(nitromethyl) nonanoic acid (**10f**)

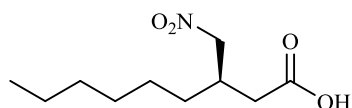

Prepared following general procedure using **9 f** (0.25 mmol, 75 mg) in THF (0,5 mL) treated with an aqueous solution of NaOH (1N, 1,25 mL, 5 equiv.) The crude mixture was submitted to column chromatography 8/2 Petroleum spirit/ Ethyl acetate and compound **10f** was obtained as pale yellow oil 47 mg, 87% yield;  $R_f = 0.5$  (Petroleum Ether/Ethyl Acetate, 3:7),  $^1\text{H}$  NMR (400 MHz,  $\text{CDCl}_3$ )  $\delta_{\text{H}}$  4.45 (dd,  $J = 6.8$ ,  $J = 12.4$ , 1H), 4.4 (dd,  $J = 6$ ,  $J = 12.4$ , 1H), 2.59-2.51 (1H, m) 2.45 (d,  $J=6.4$ , 2H), 1.39-1.35 (m, 2H), 1.25-1.19 (m, 8H), 0.82 (t, 3H),  $^{13}\text{C}$  (100.6 MHz,  $\text{CDCl}_3$ )  $\delta_{\text{C}}$  176.9, 78.8, 35.5, 34.1, 31.7, 31.5, 29.1, 26.5, 22.7, 14.1. HRMS found:  $[\text{M}-\text{H}]^-$  216.1299,  $\text{C}_{10}\text{H}_{20}\text{NO}_4$  requires 216.1241.

Preparation of (R)-3-(nitromethyl) dodecanoic acid (**10i**).

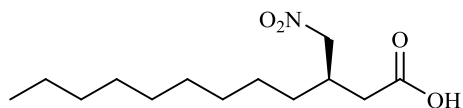

Prepared following general procedure using **9i** (0.25 mmol, 85 mg) in THF (0,5 mL) treated with an aqueous solution of NaOH (1N, 1,25 mL, 5 equiv.) The crude mixture was submitted to column chromatography 8/2 Petroleum spirit/ Ethyl acetate and compound **10i** was obtained as pale yellow oil 56.4 mg, 87% yield;  $R_f = 0.5$  (Petroleum Ether/Ethyl Acetate, 3:7),  $^1\text{H}$  NMR (400 MHz,  $\text{CDCl}_3$ )  $\delta_{\text{H}}$  4.51-4.41 (2H, m), 2.64-2.55 (1H, m), 2.51-2.49 (1H, m), 1.43-1.39 (14H, m) 0.87-0.84 (m, 3H),  $^{13}\text{C}$  (100.6 MHz,  $\text{CDCl}_3$ )  $\delta_{\text{C}}$  177.5, 78.5, 35.7, 34.1, 32.0, 31.4, 29.9, 29.6, 29.5, 29.4, 26.6, 22.8, 14.2. HRMS found:  $[\text{M}-\text{H}]^-$  258.1712,  $\text{C}_{13}\text{H}_{24}\text{NO}_4$  requires 258.1711.



### Preparation of (S)-Pregabalin **11**

In a 5 mL round bottomed flask were charged Raney-Ni (2 equiv, 1g), methanol (2.5 mL) and nitroacid *ent*-**10d** (0.5g). The suspension obtained was stirred at room temperature under H<sub>2</sub> (1 atm) for 6h, then the liquid phase decanted. The methanolic solution was evaporated to give pregabalin **7** (0.394g, 95% yield) as a colorless solid. Pregabalin was identified with published data.<sup>1</sup>

---

<sup>1</sup> H. Gotoh, H. Ishikawa, Y. Hayashi, *Org. Lett.*, 2007, **9**, 25, 5307

## Compound 6a

mm331pCDC13b1a

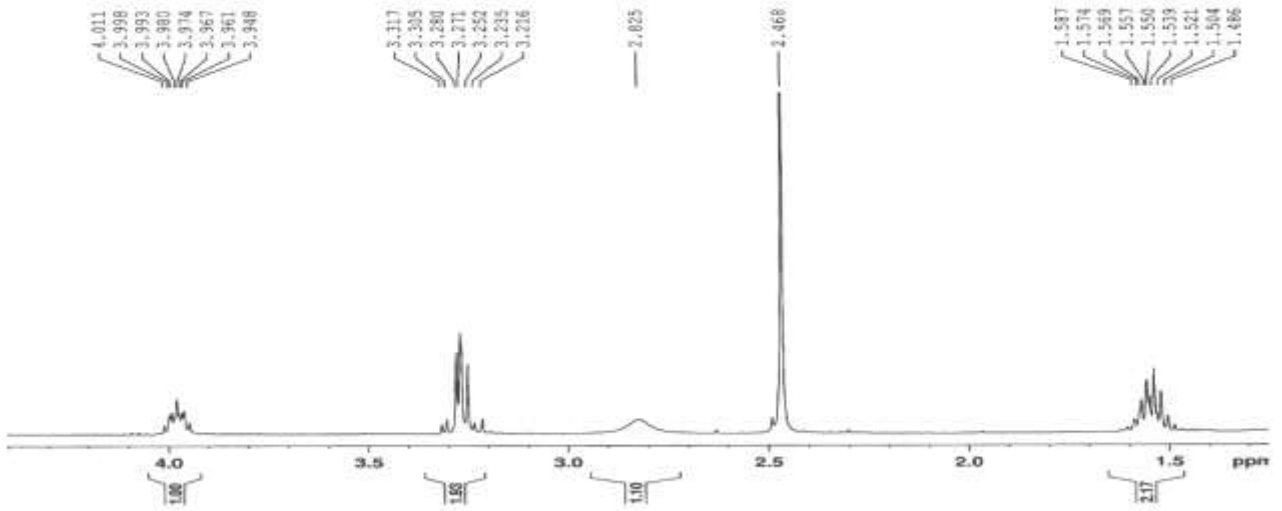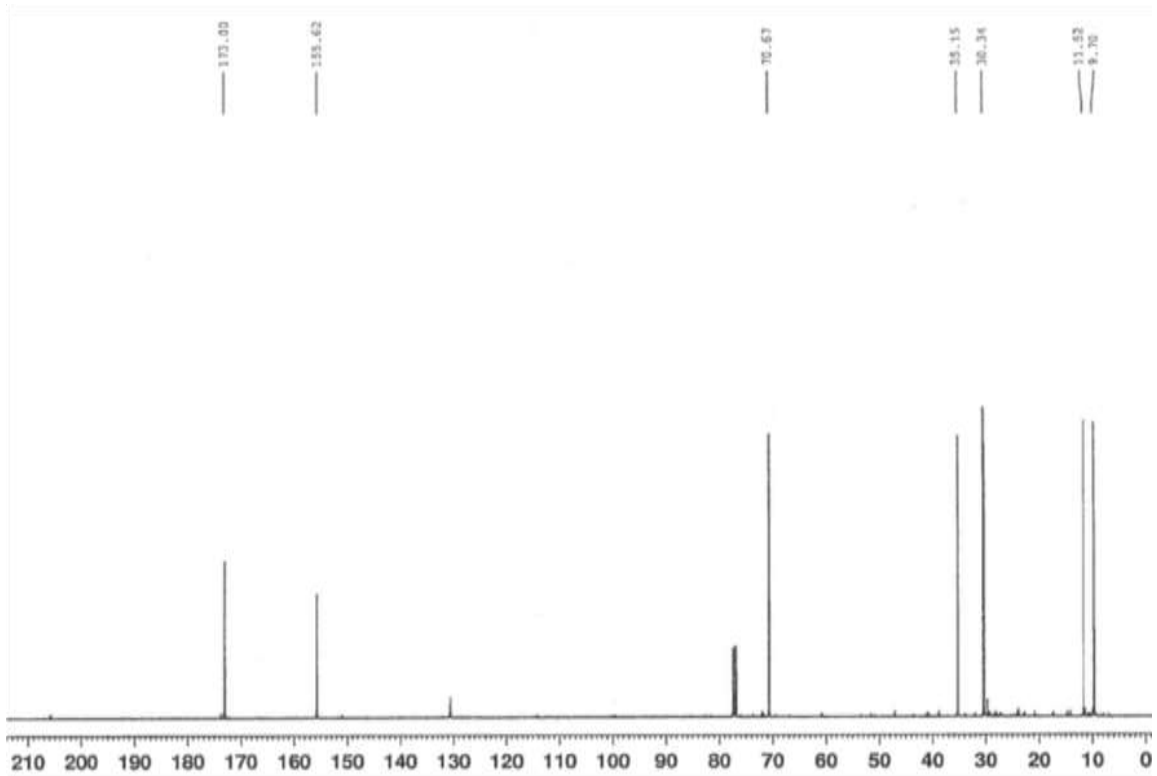

## Compound 6b

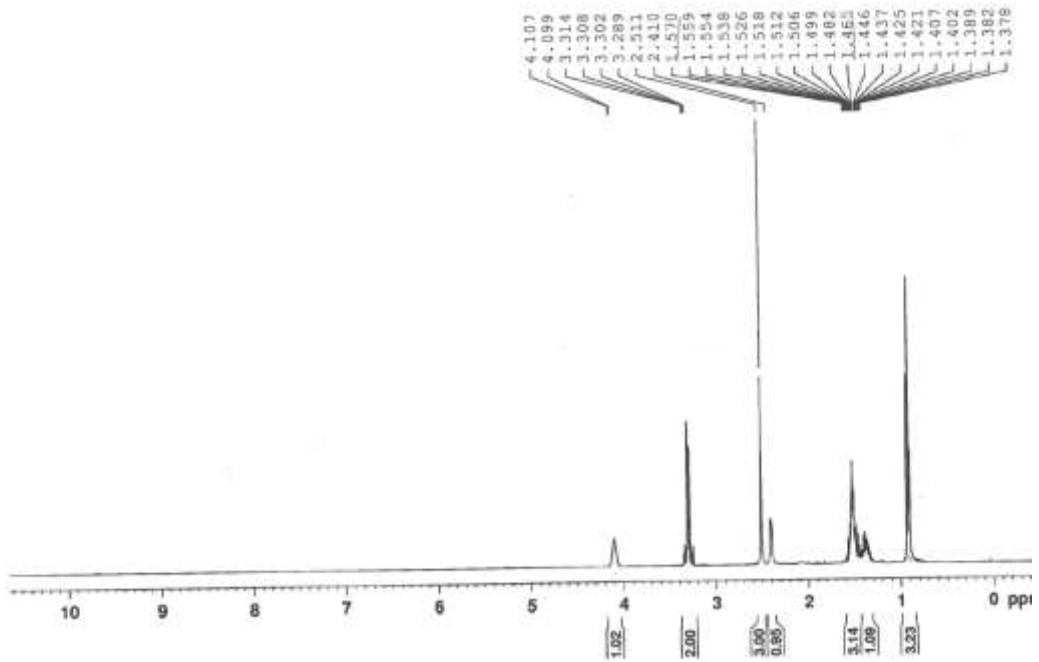

IA001.tt2-5.CDC13

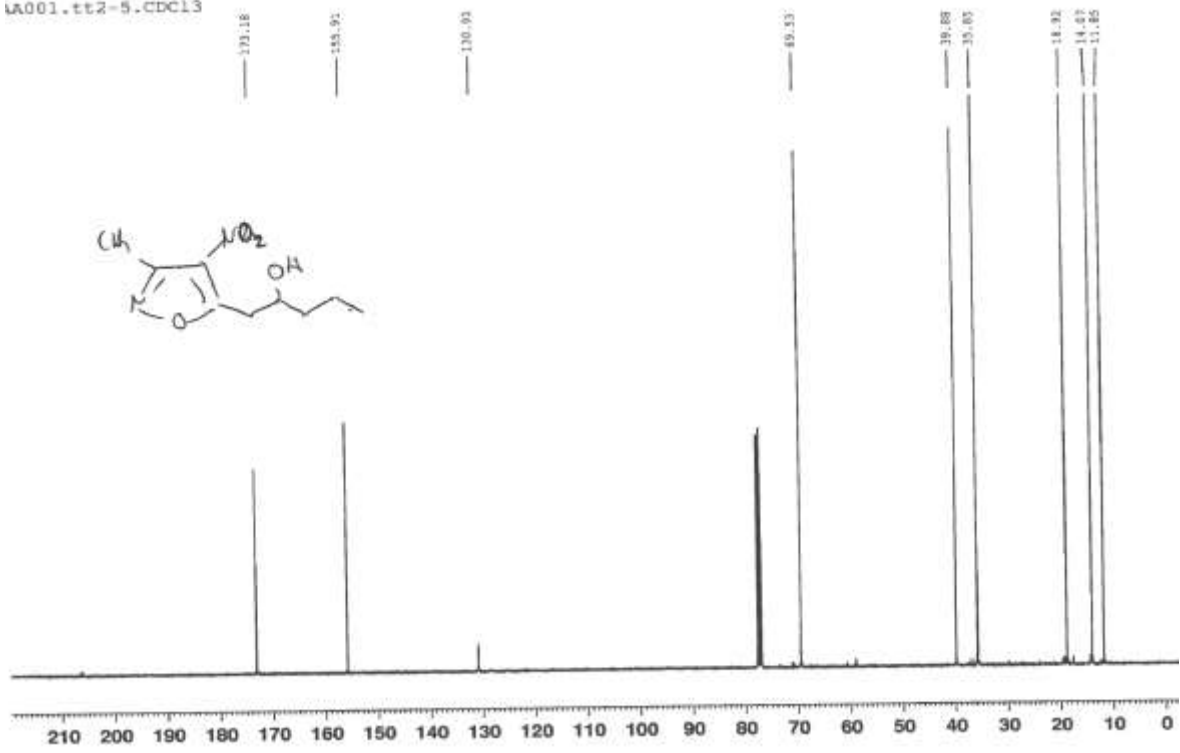

Compound 6c

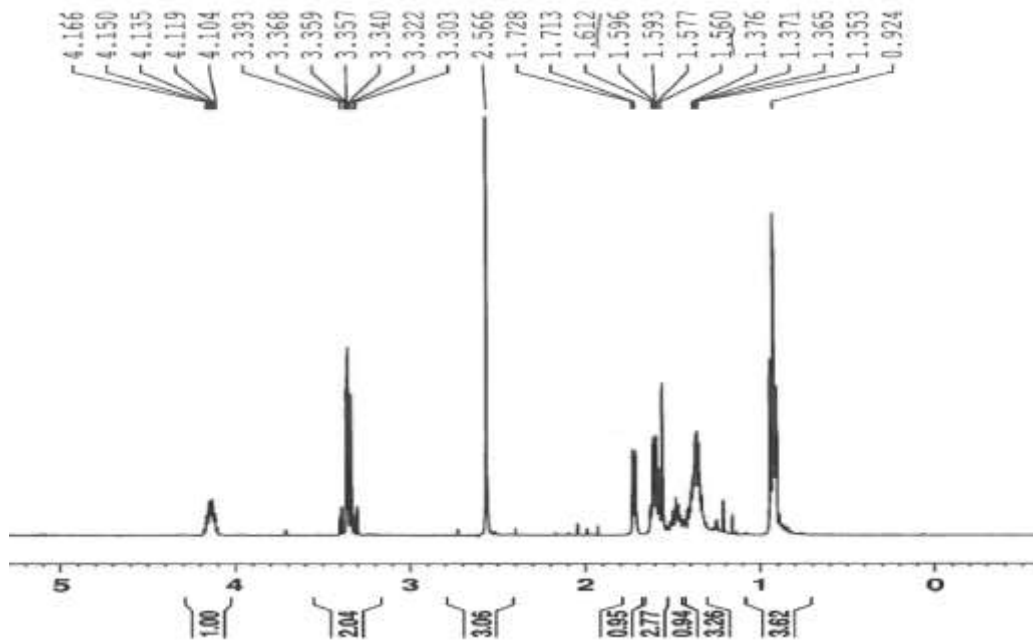

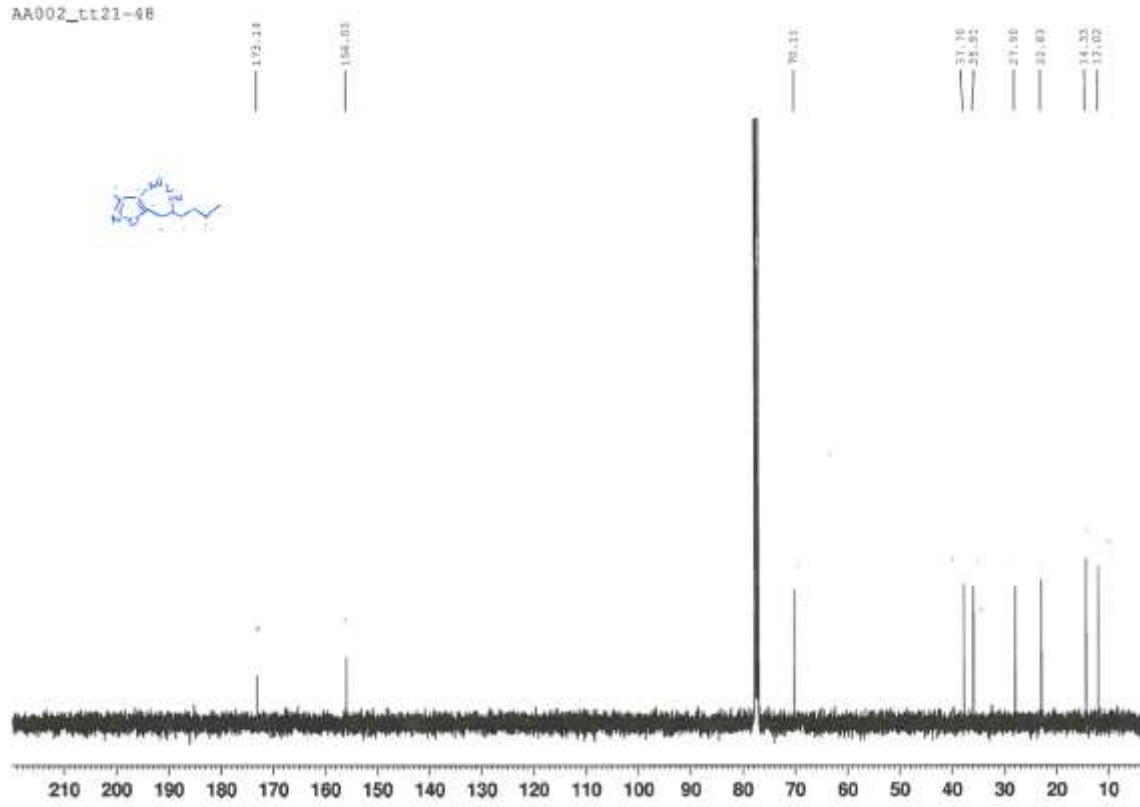

## Compound 6d

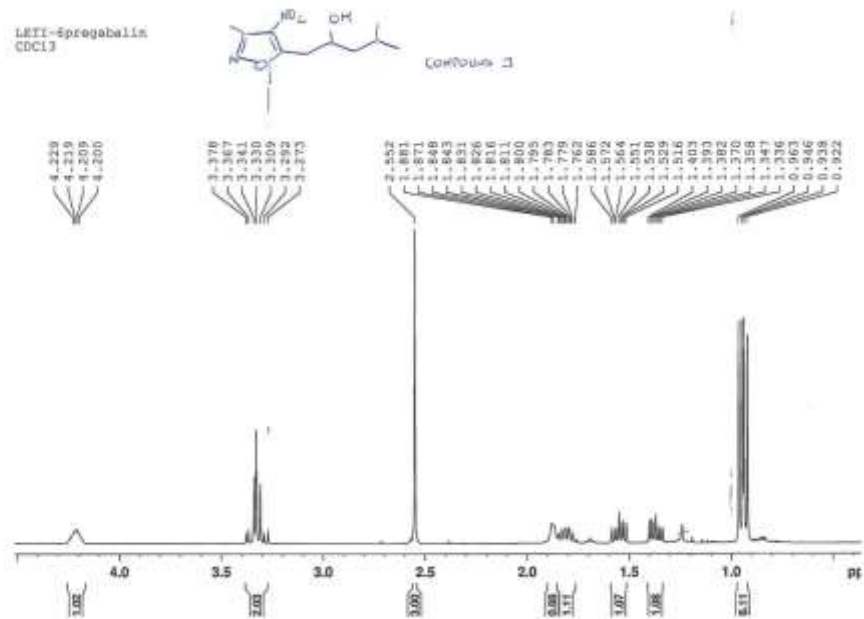

MS-1024 v. 3 - Ref1

LETI-6pregabalinCl3  
CDCl3

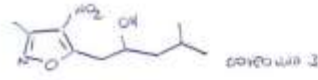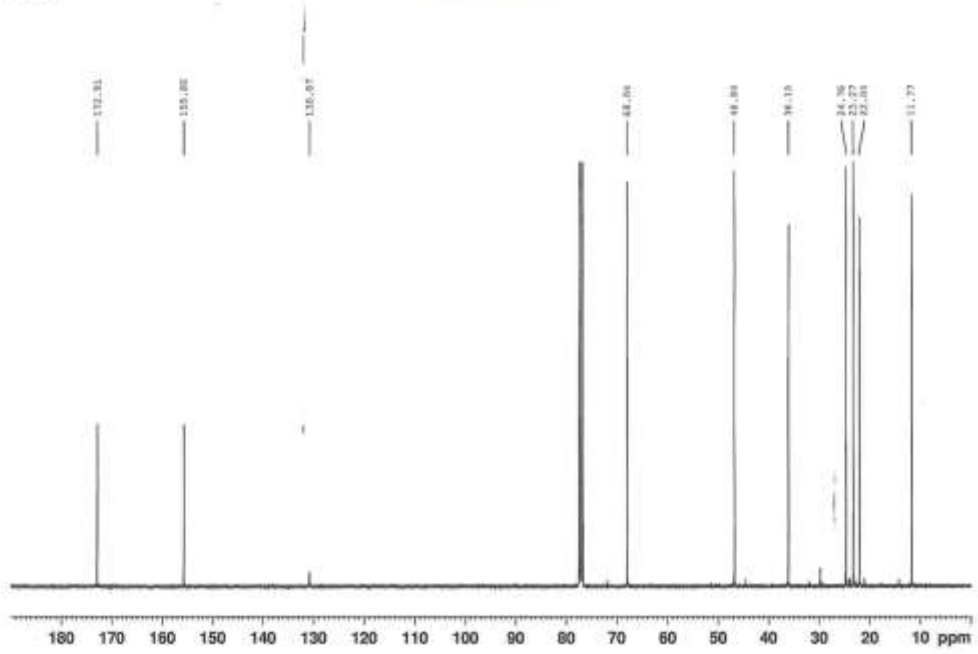

### Compound 6e

AA004\_tt5-26

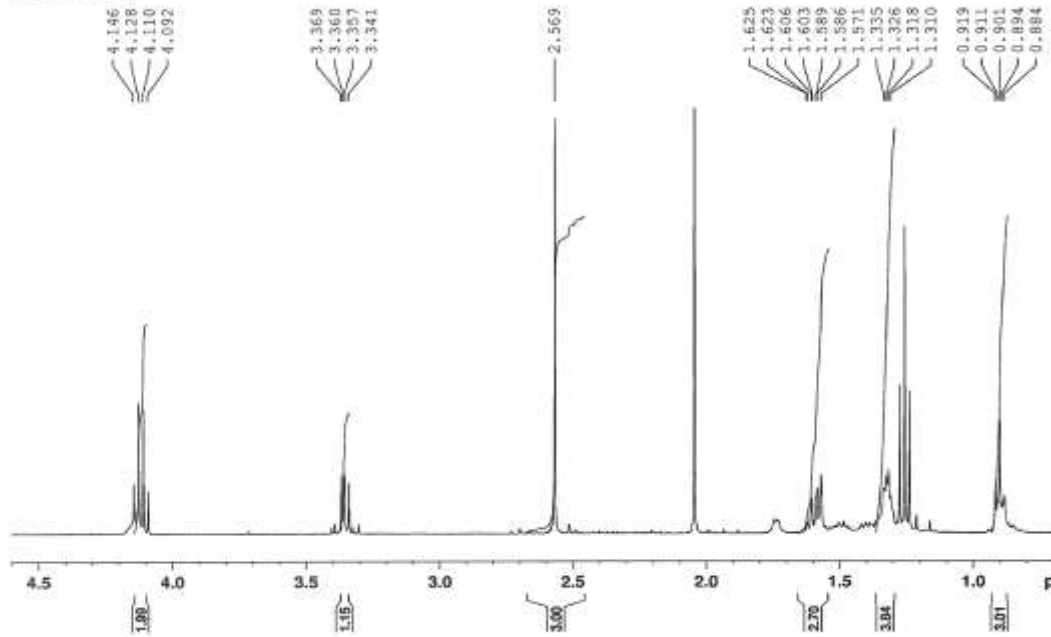

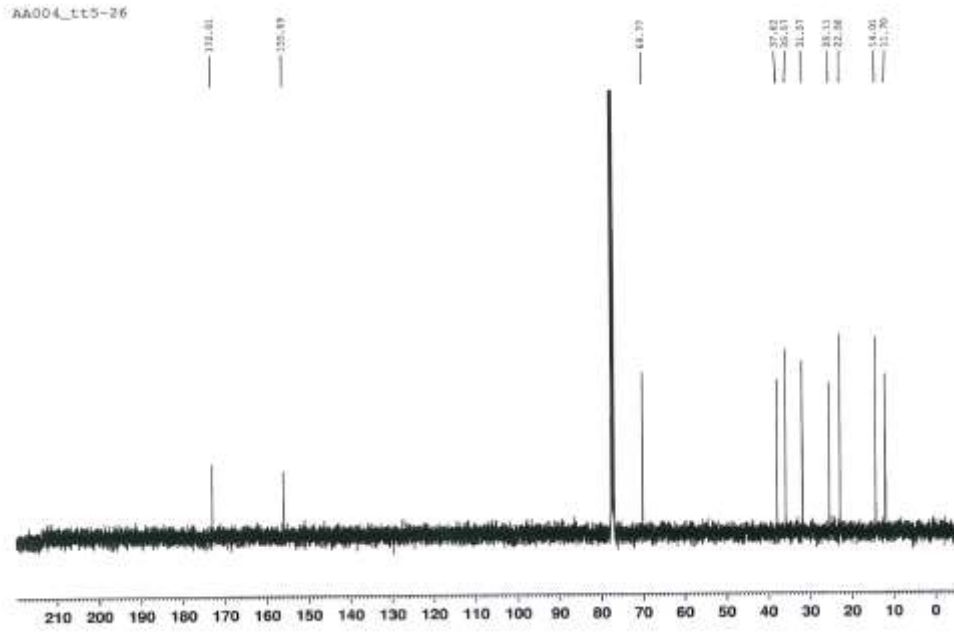

Compound 6f

nm288pCDC13 hept

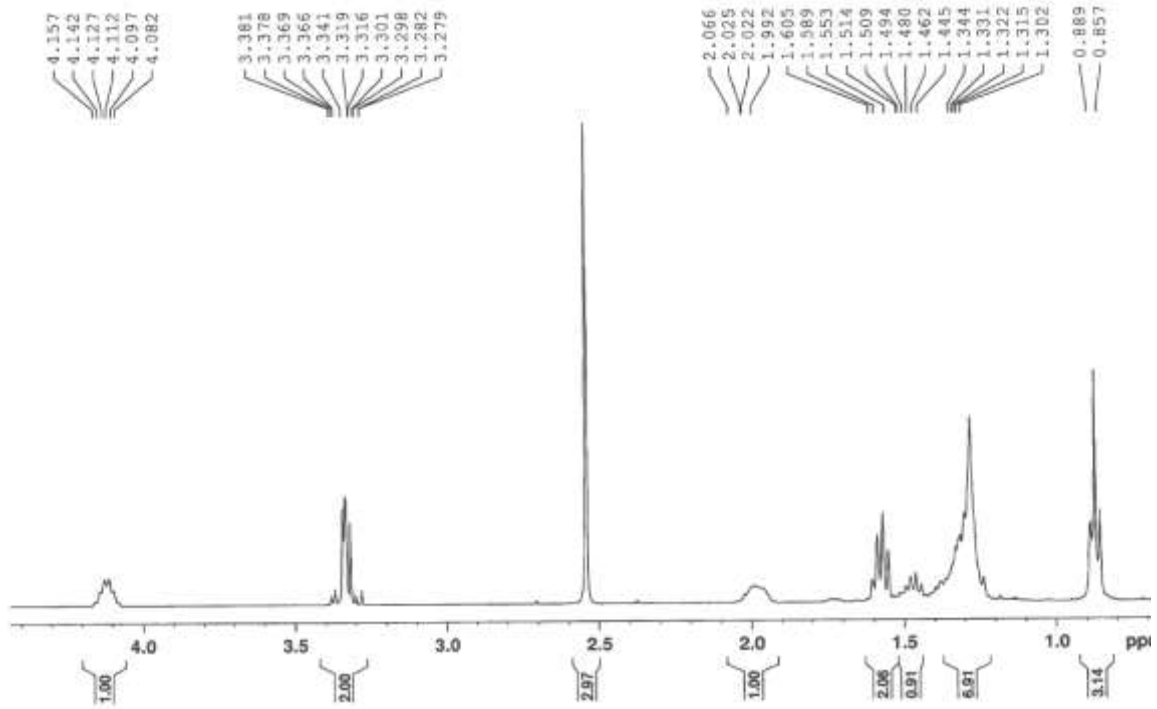

nm288pCDC13

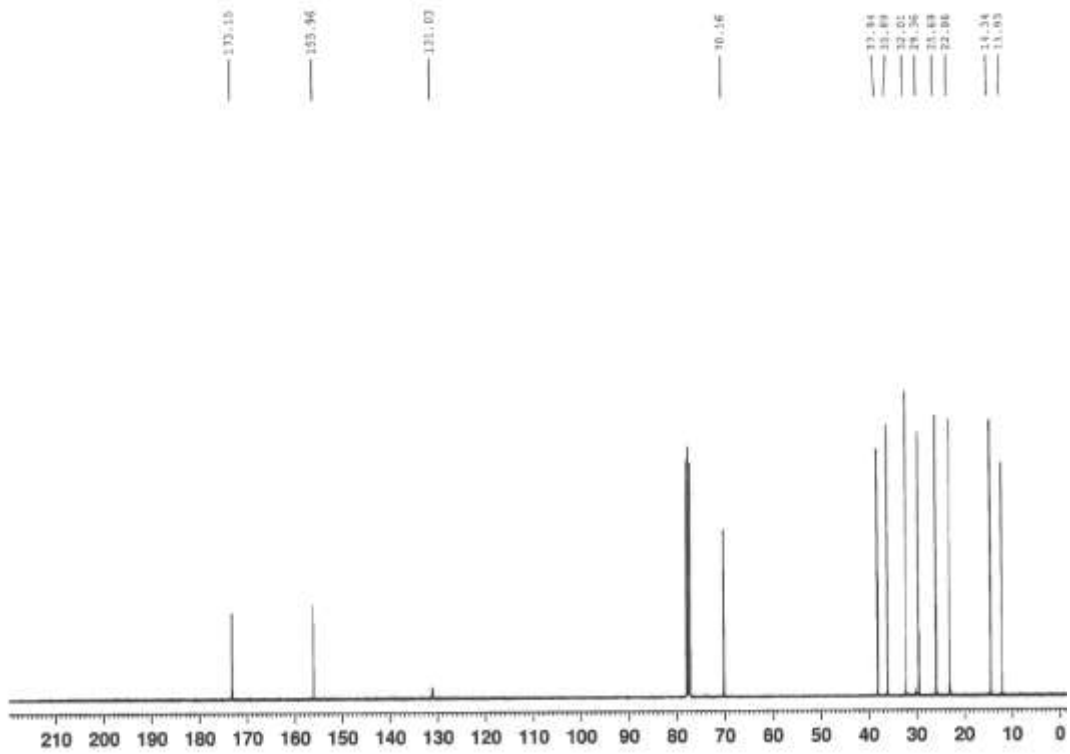



## Compound 6g

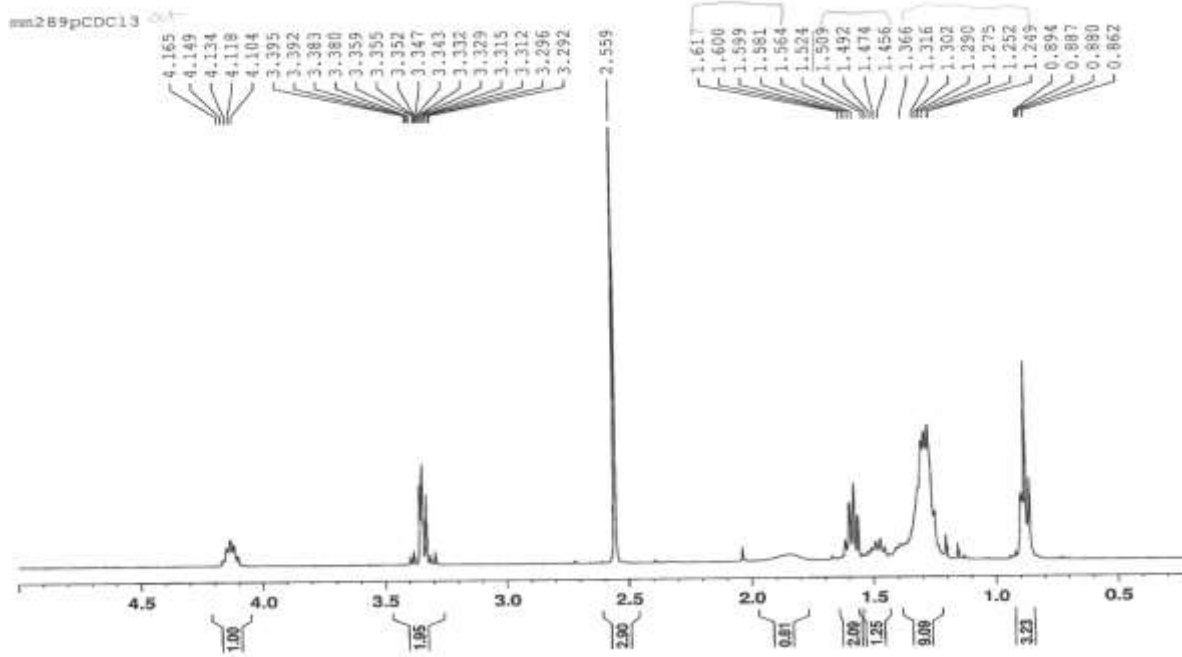

nm289pCDC13

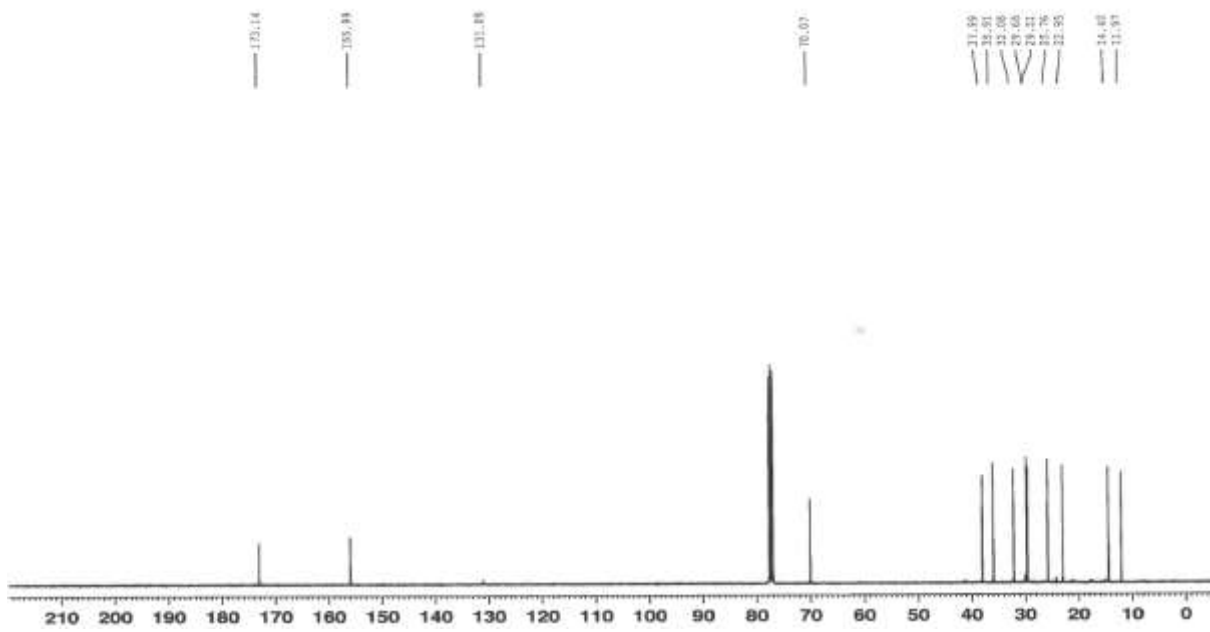

## Compound 6h

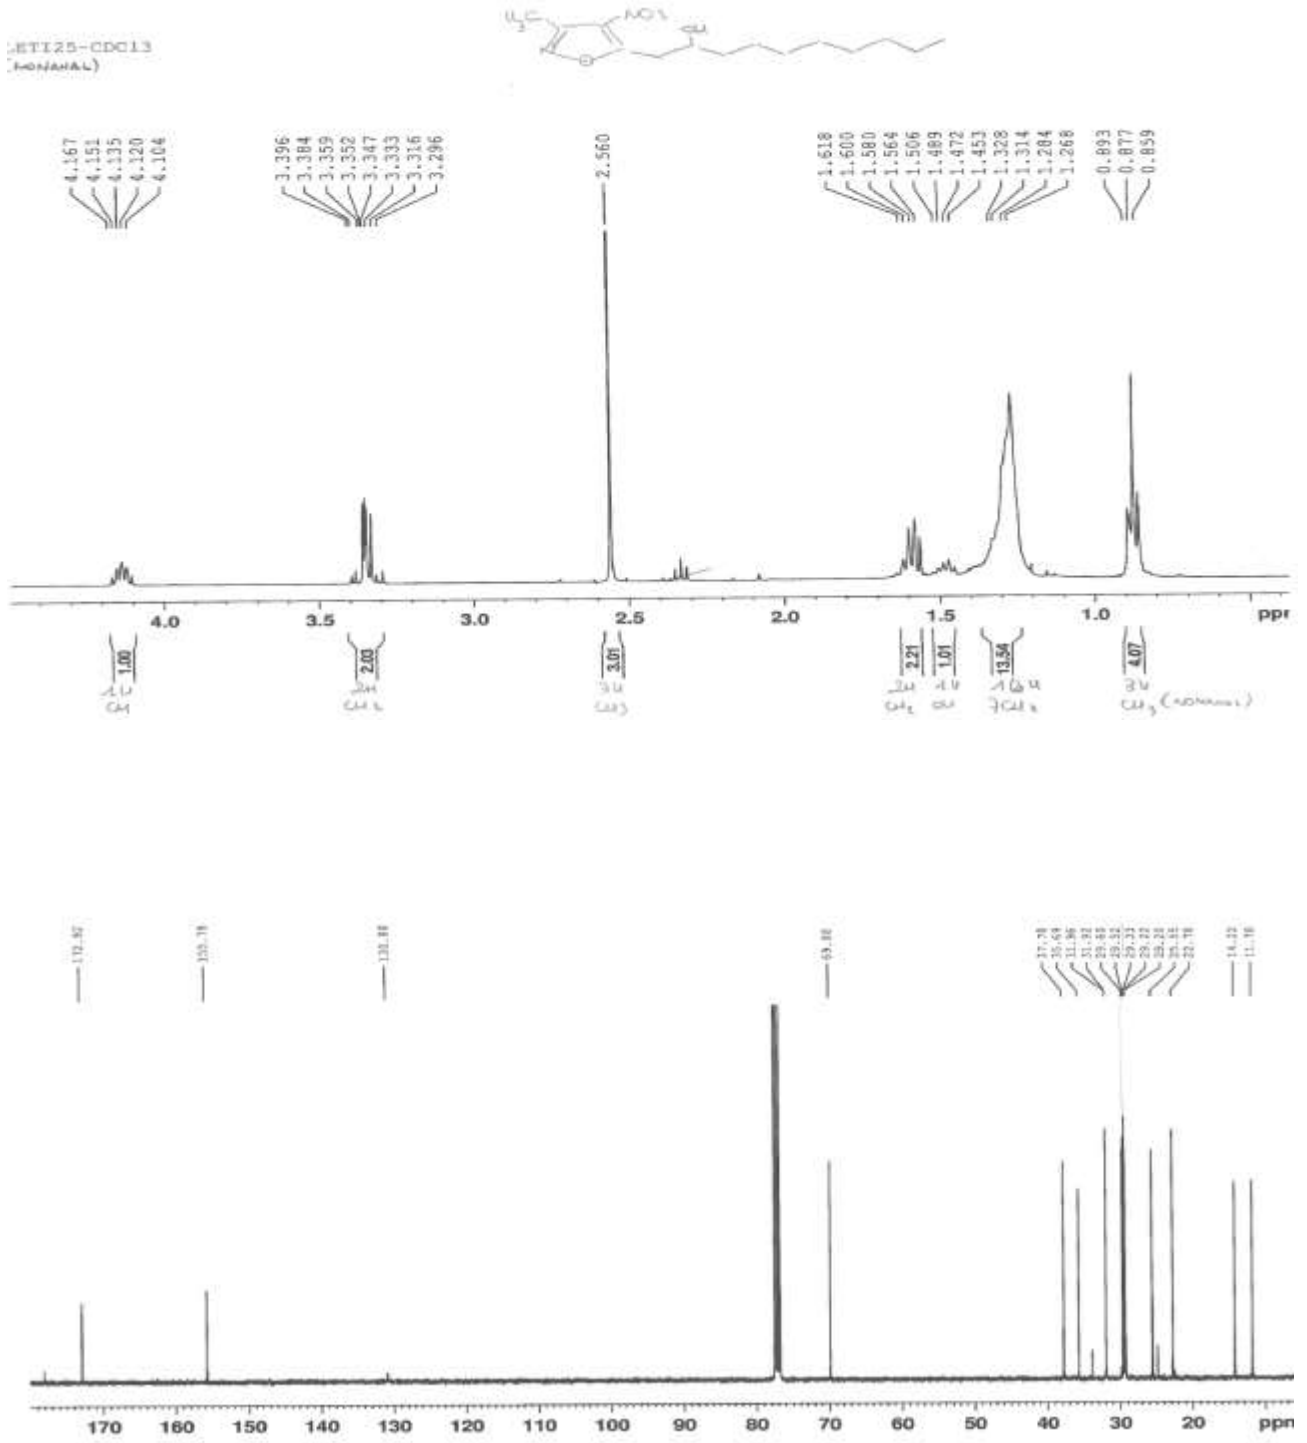

Compound 6i

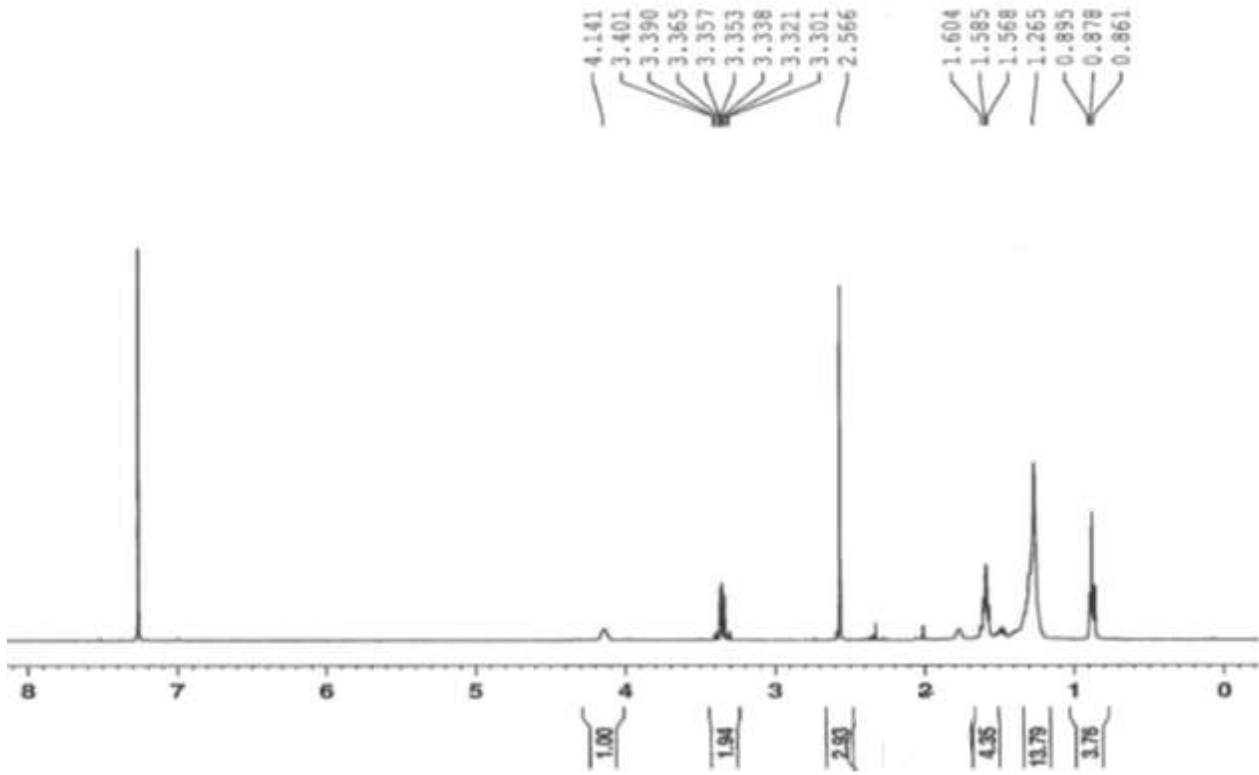

11-44

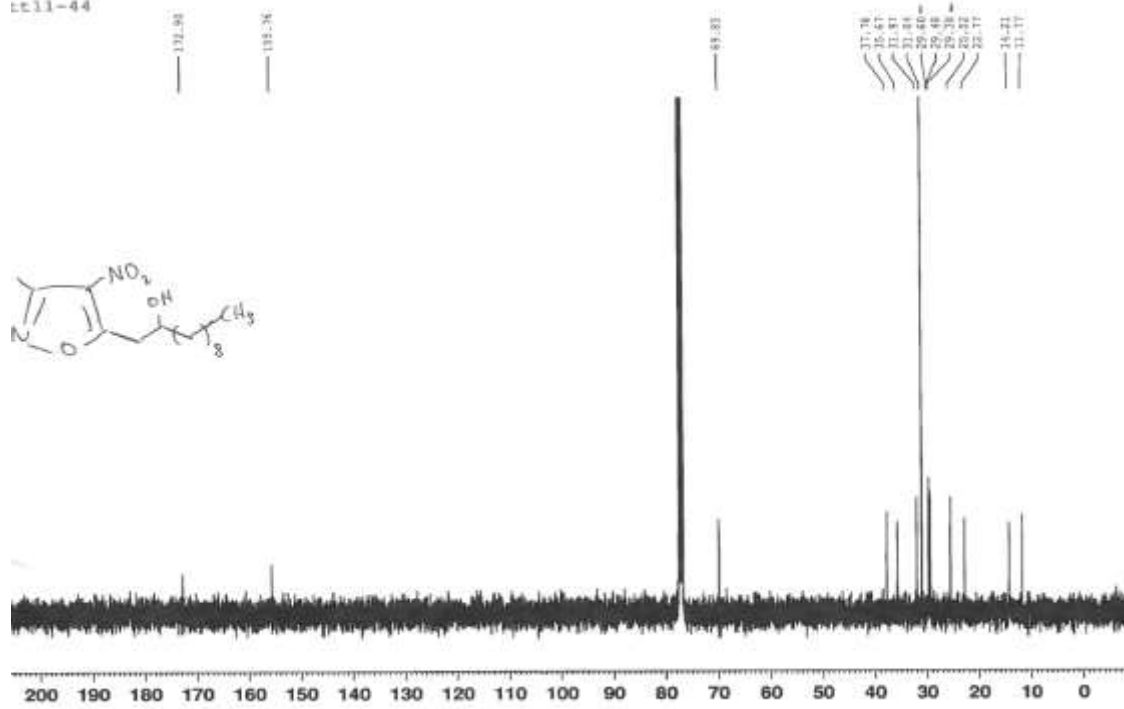

## Compound 7a

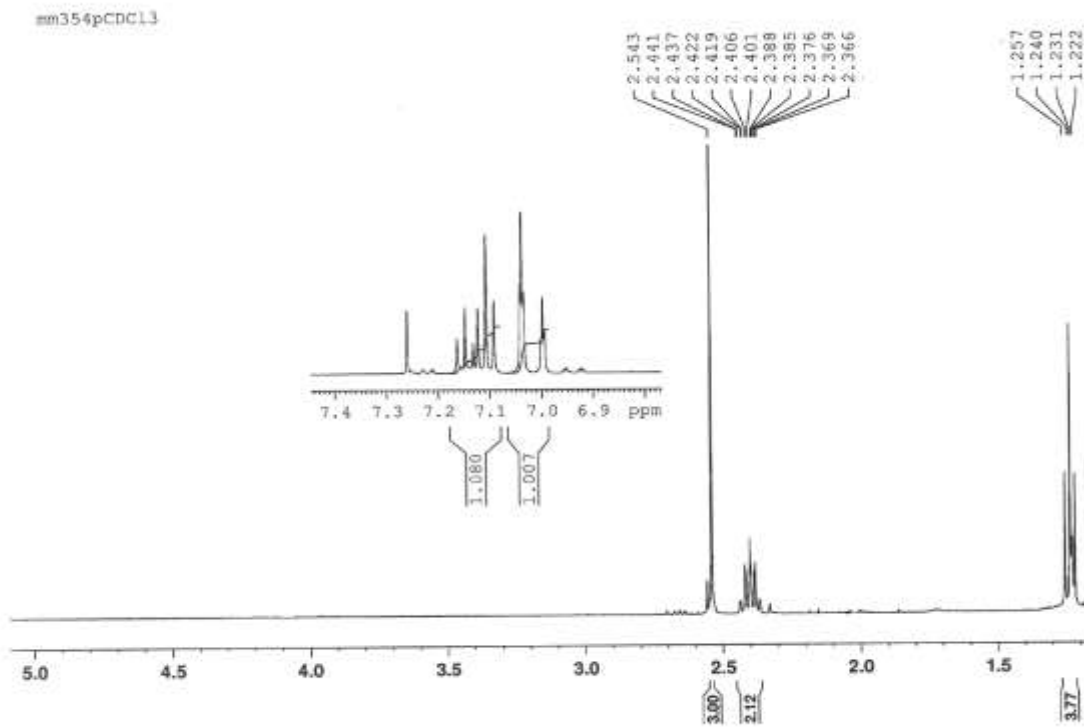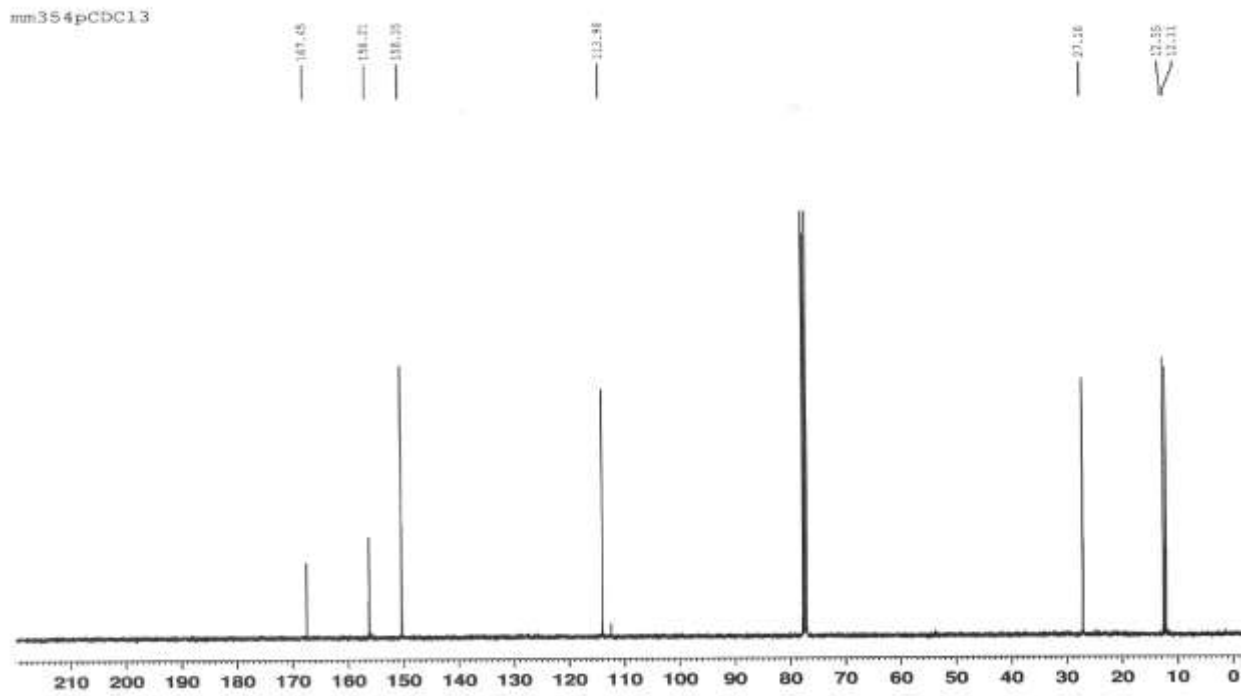

## Compound 7b

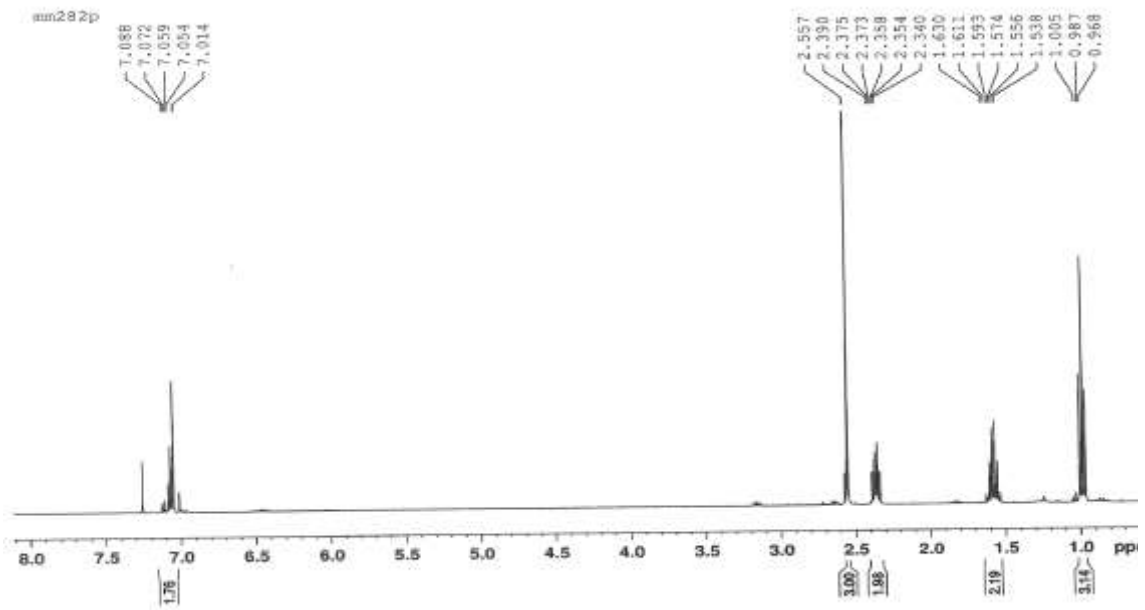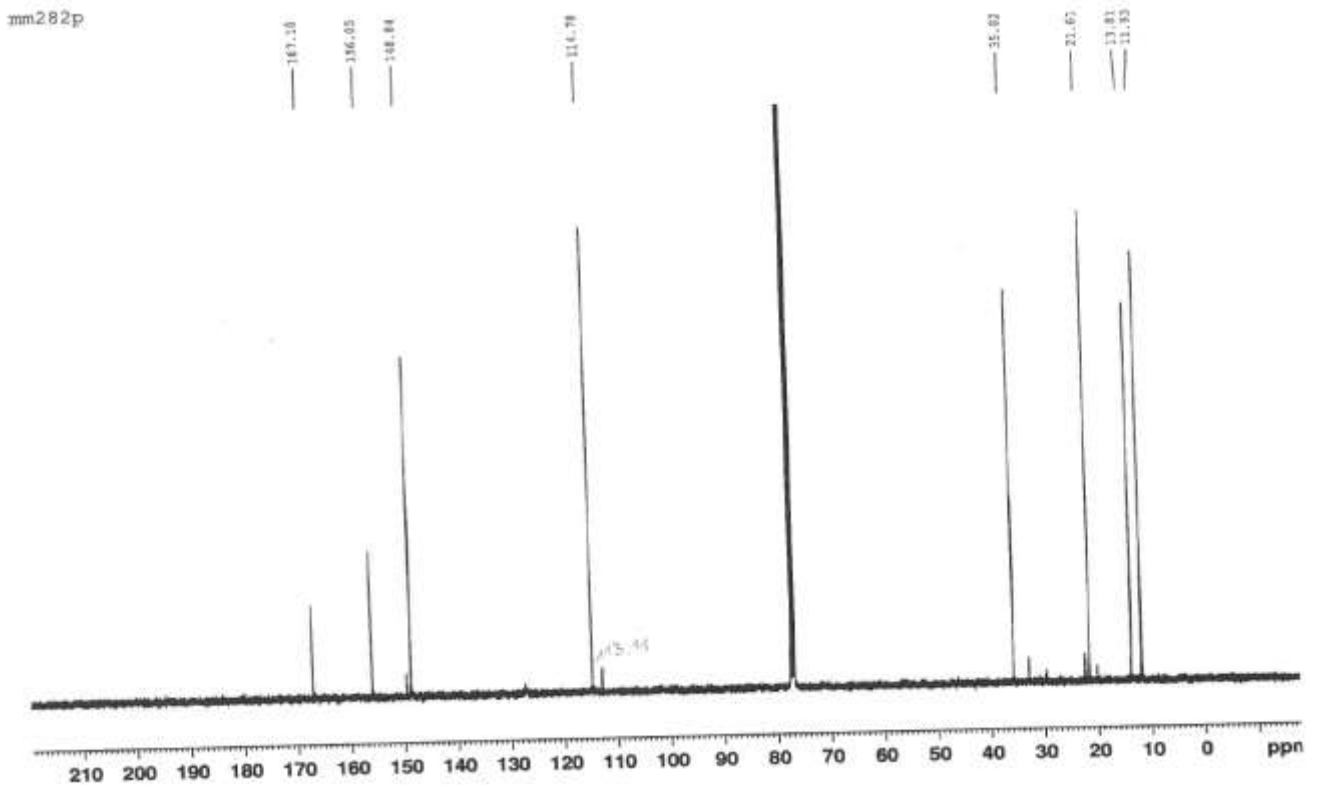

## Compound 7c

AA007\_t14-12 Var1

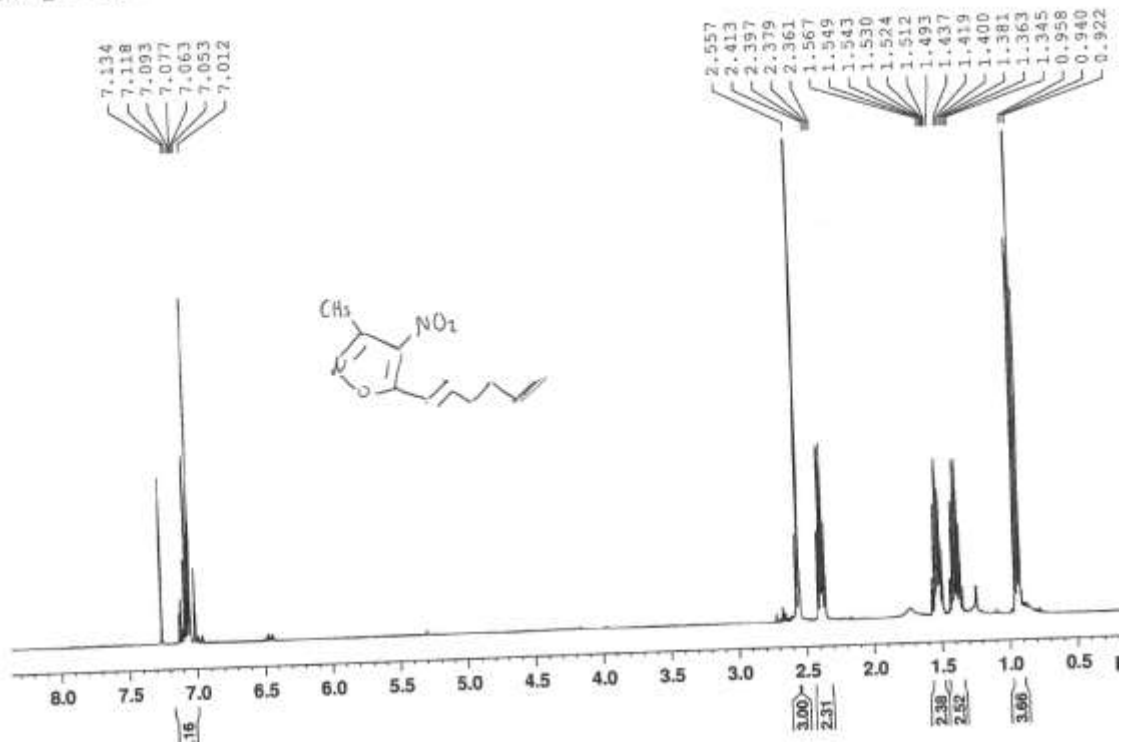

AA007\_t14-12

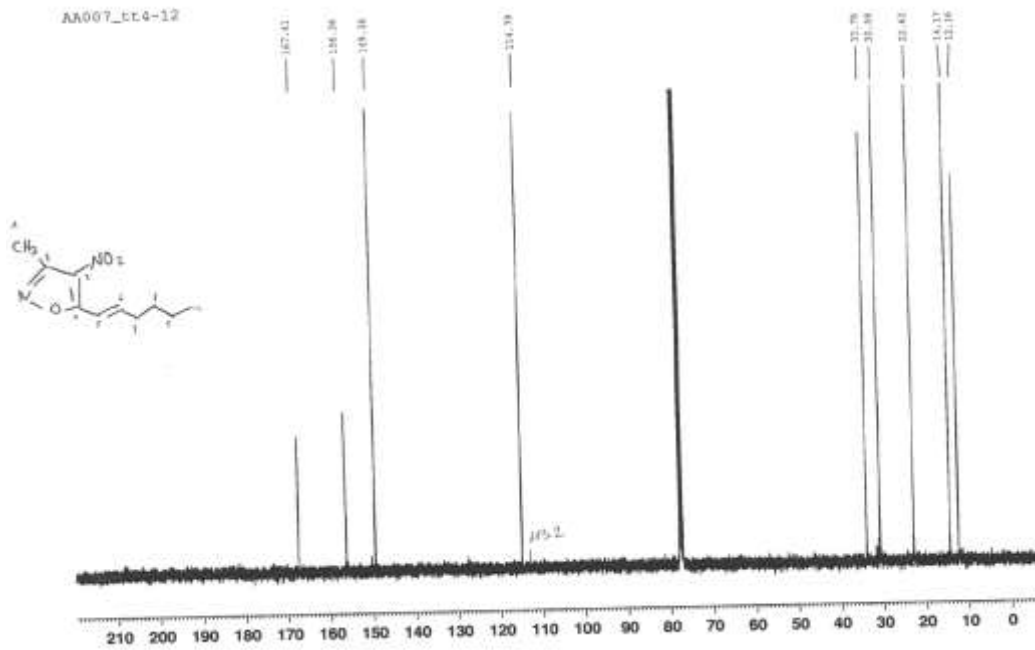

## Compound 7d

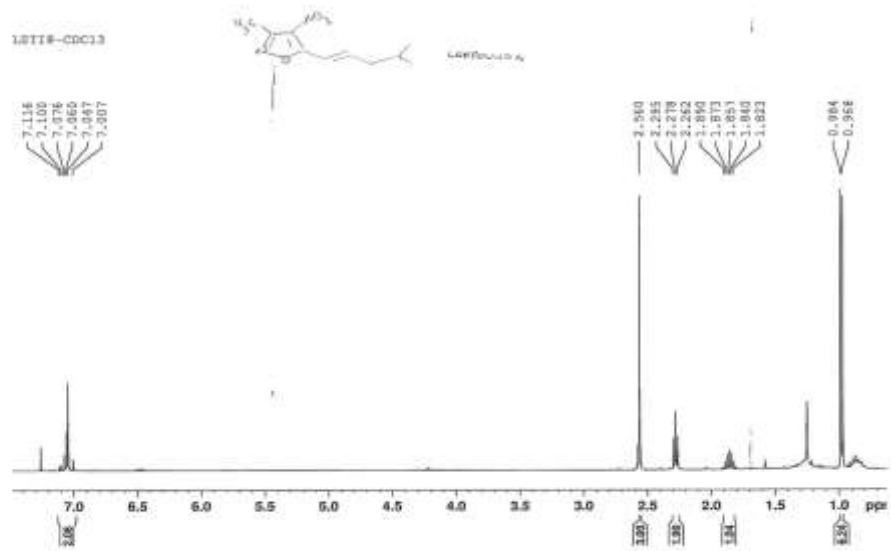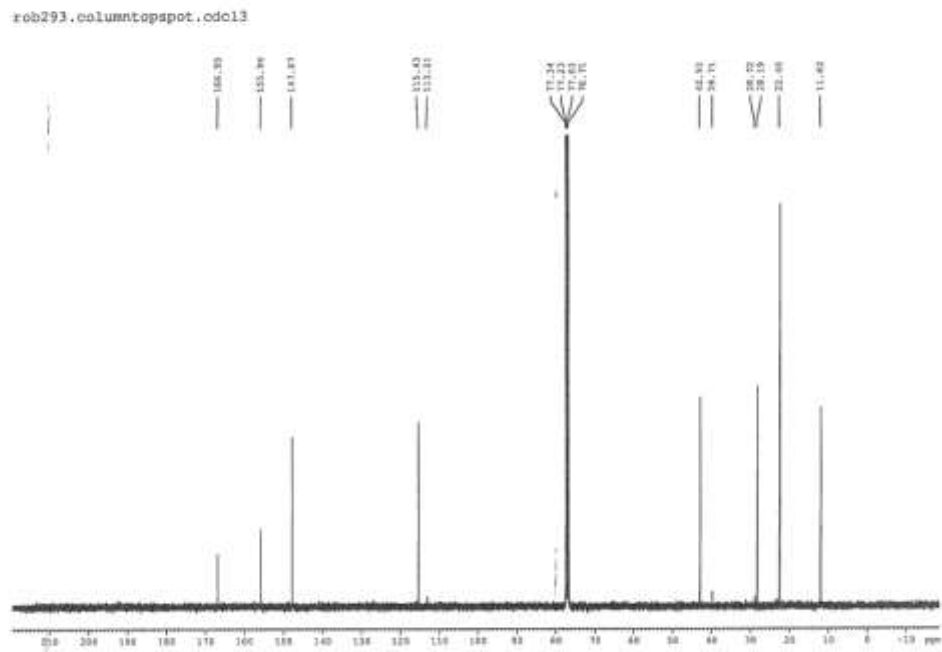

## Compound 7e

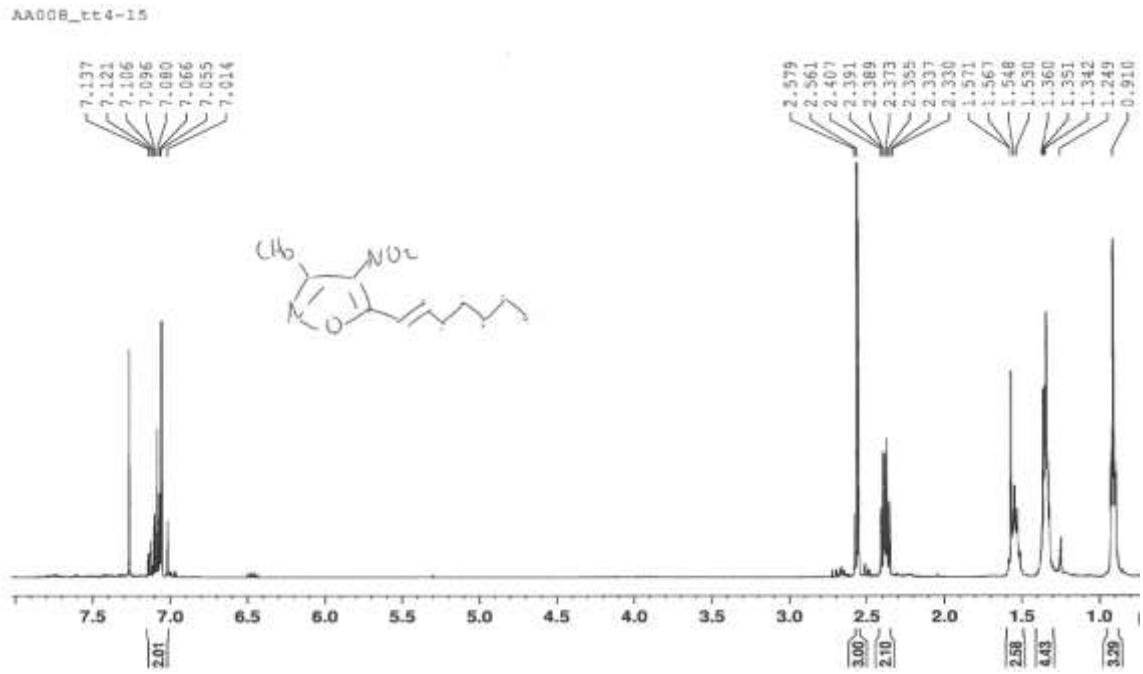



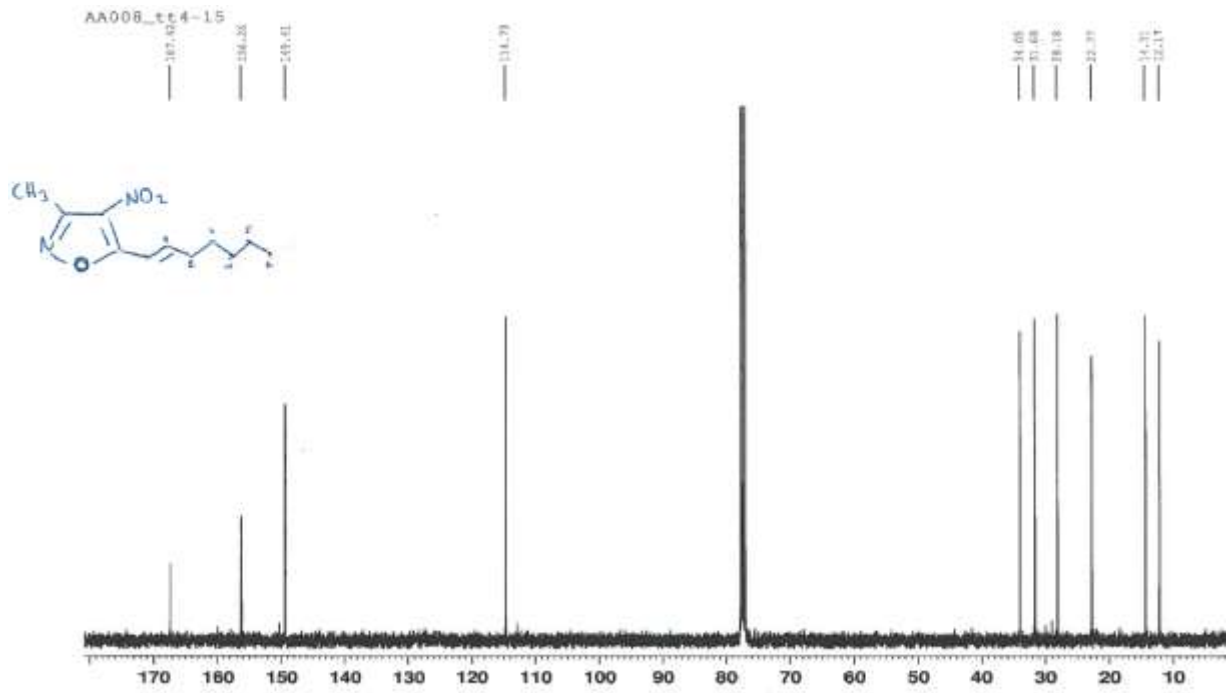

Compound 7f

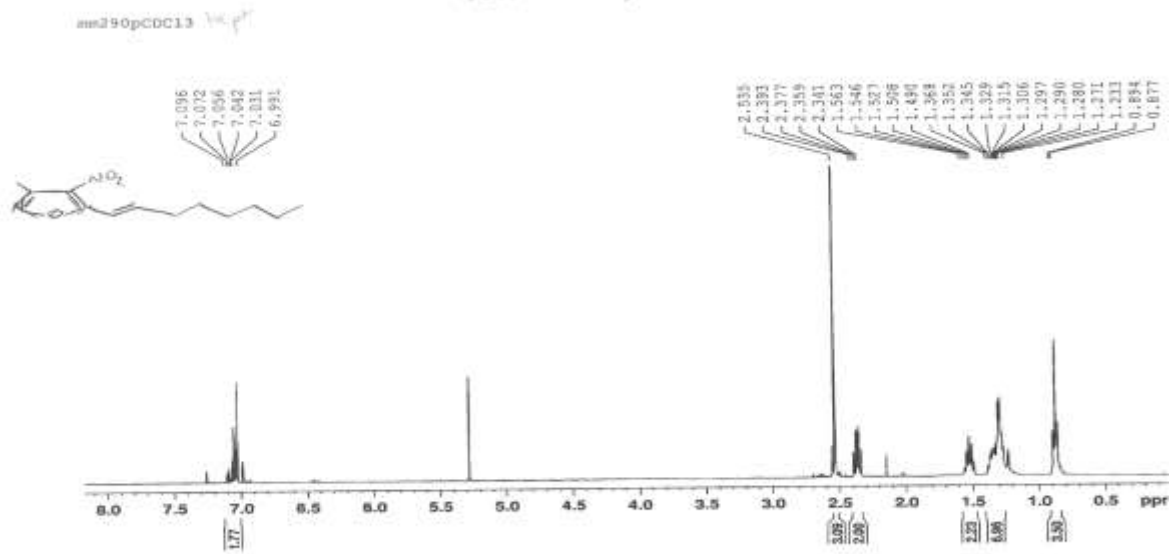

mm290pCDC13

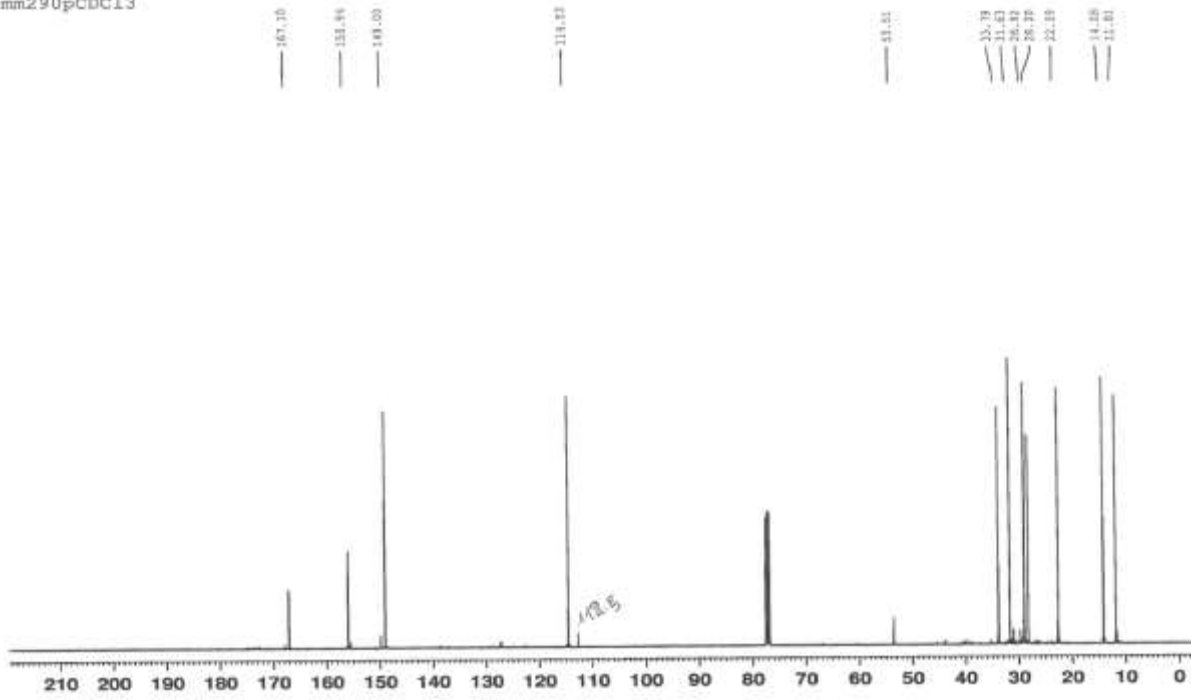

## Compound 7g

1KT138-CDCl<sub>3</sub>  
(CDCl<sub>3</sub>)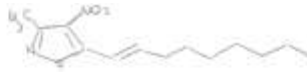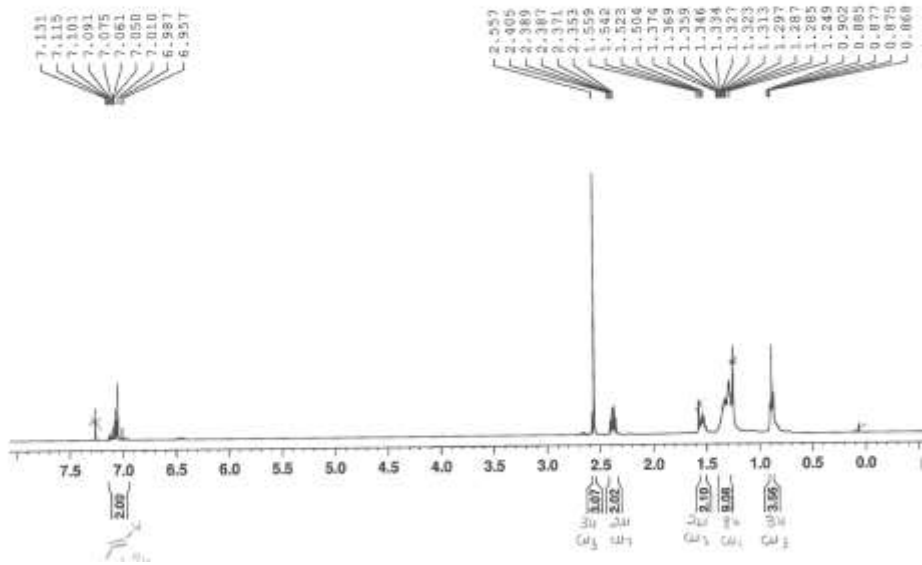

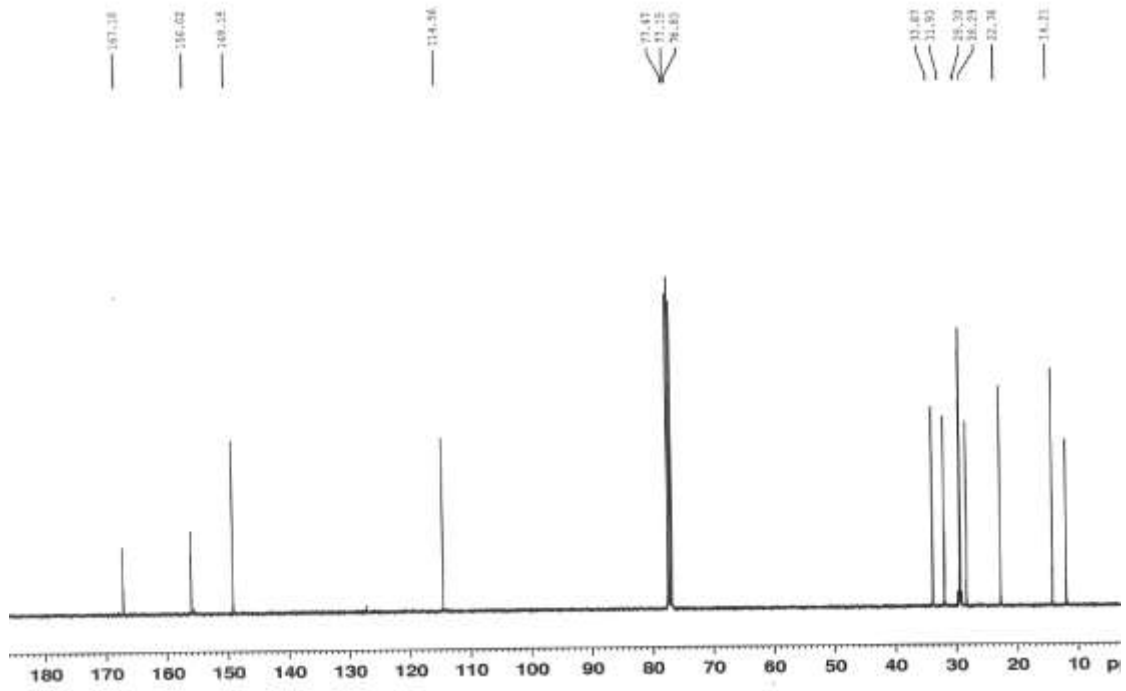

### Compound 7h

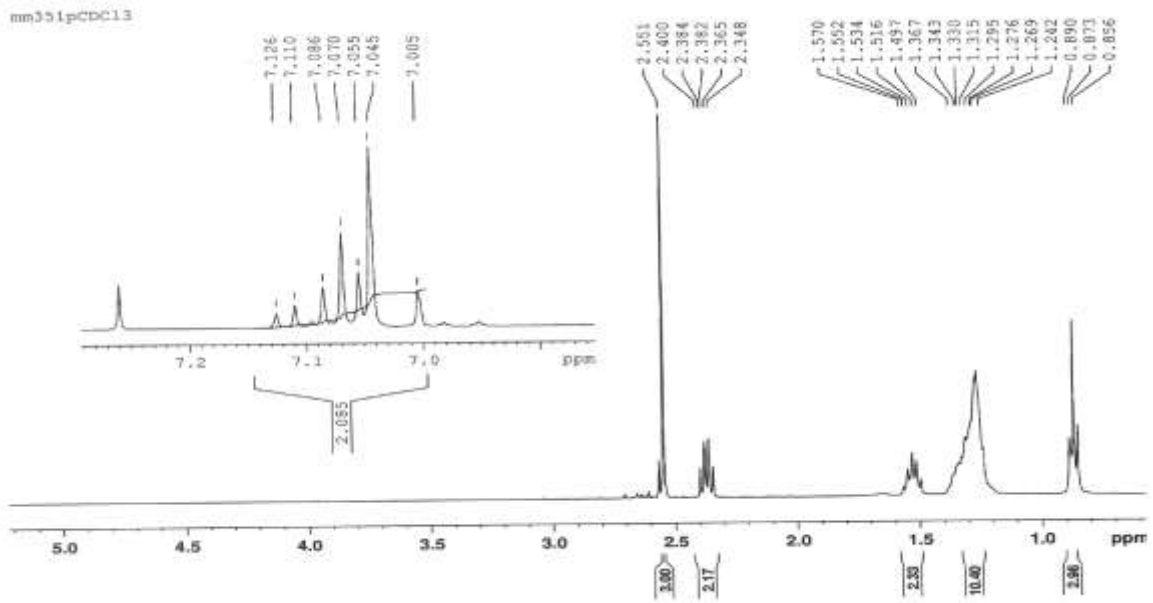

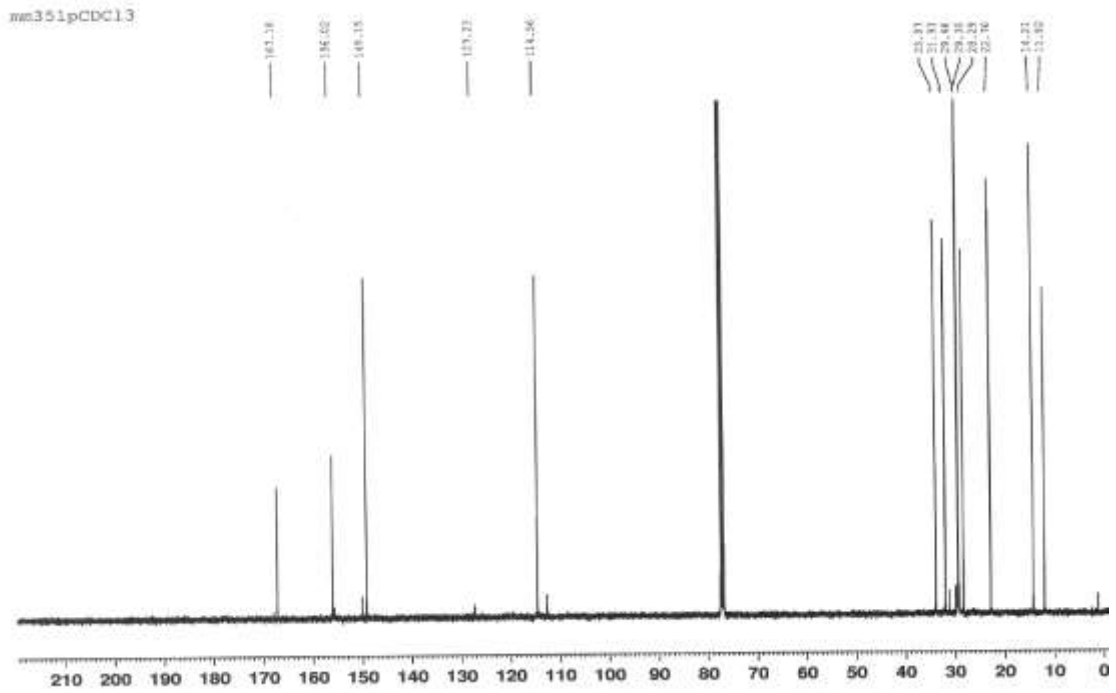

### Compound 7i

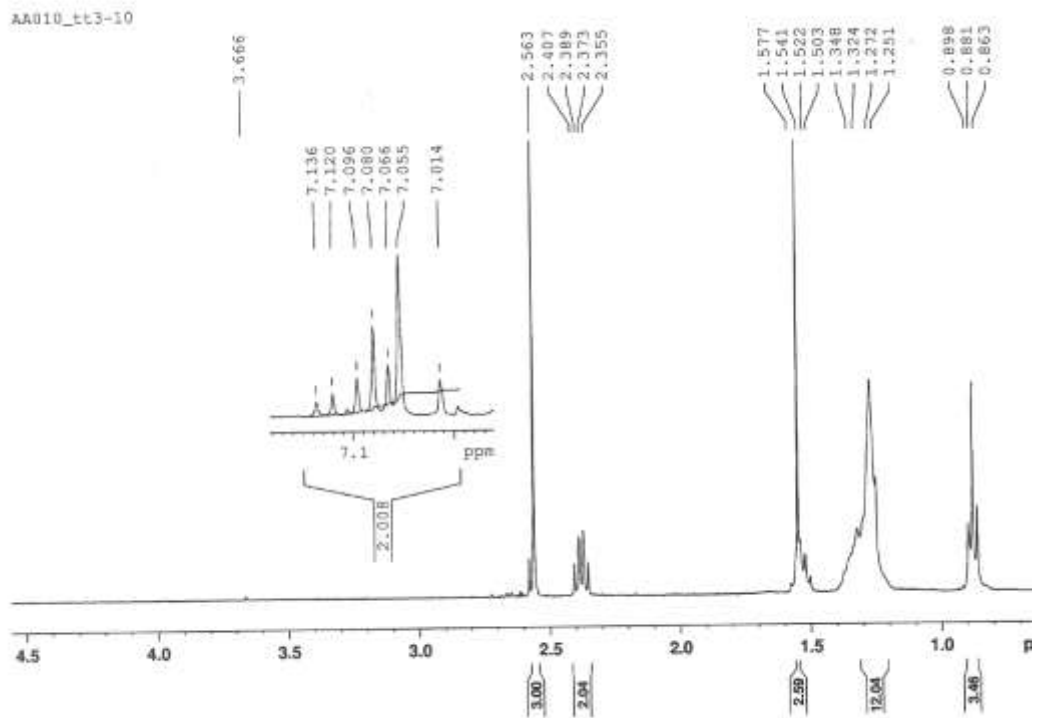

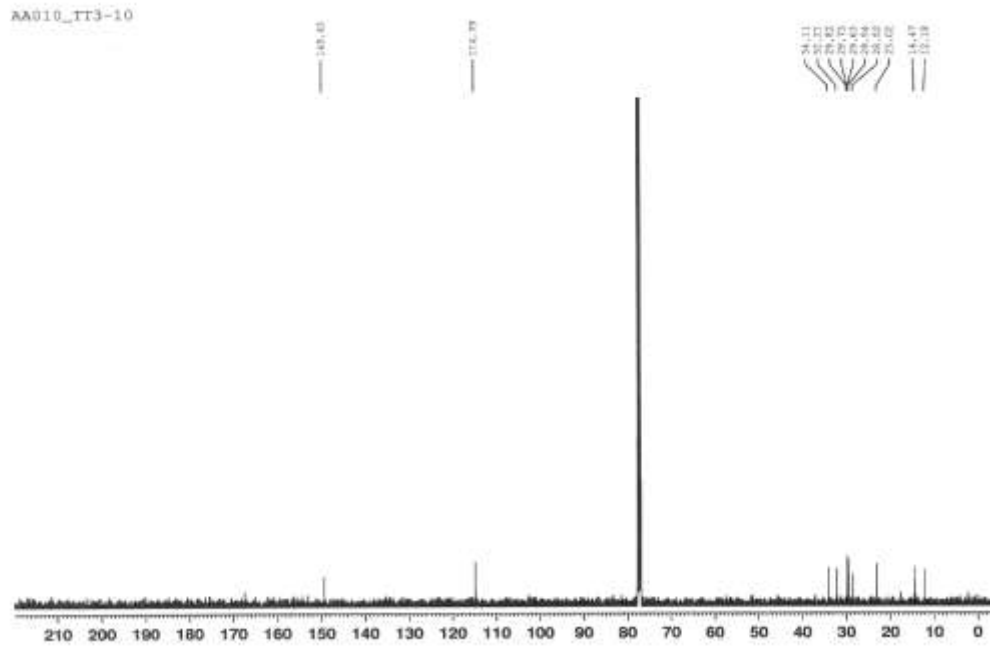

Compound 9a

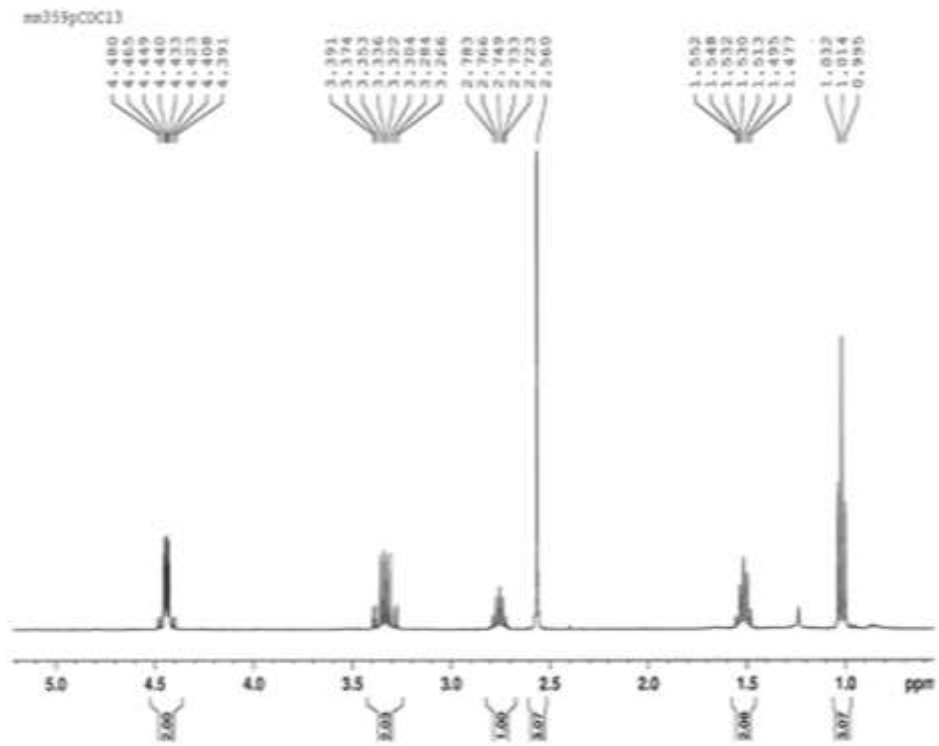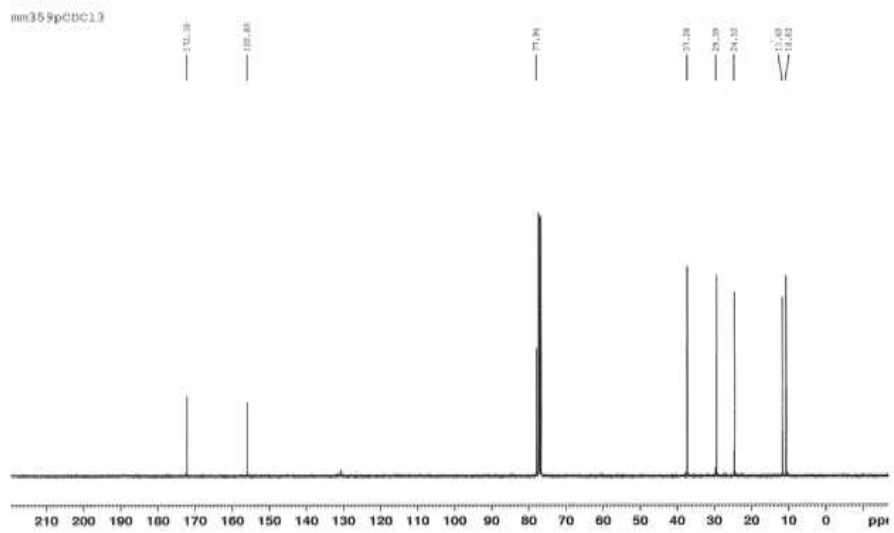

Compound 9b

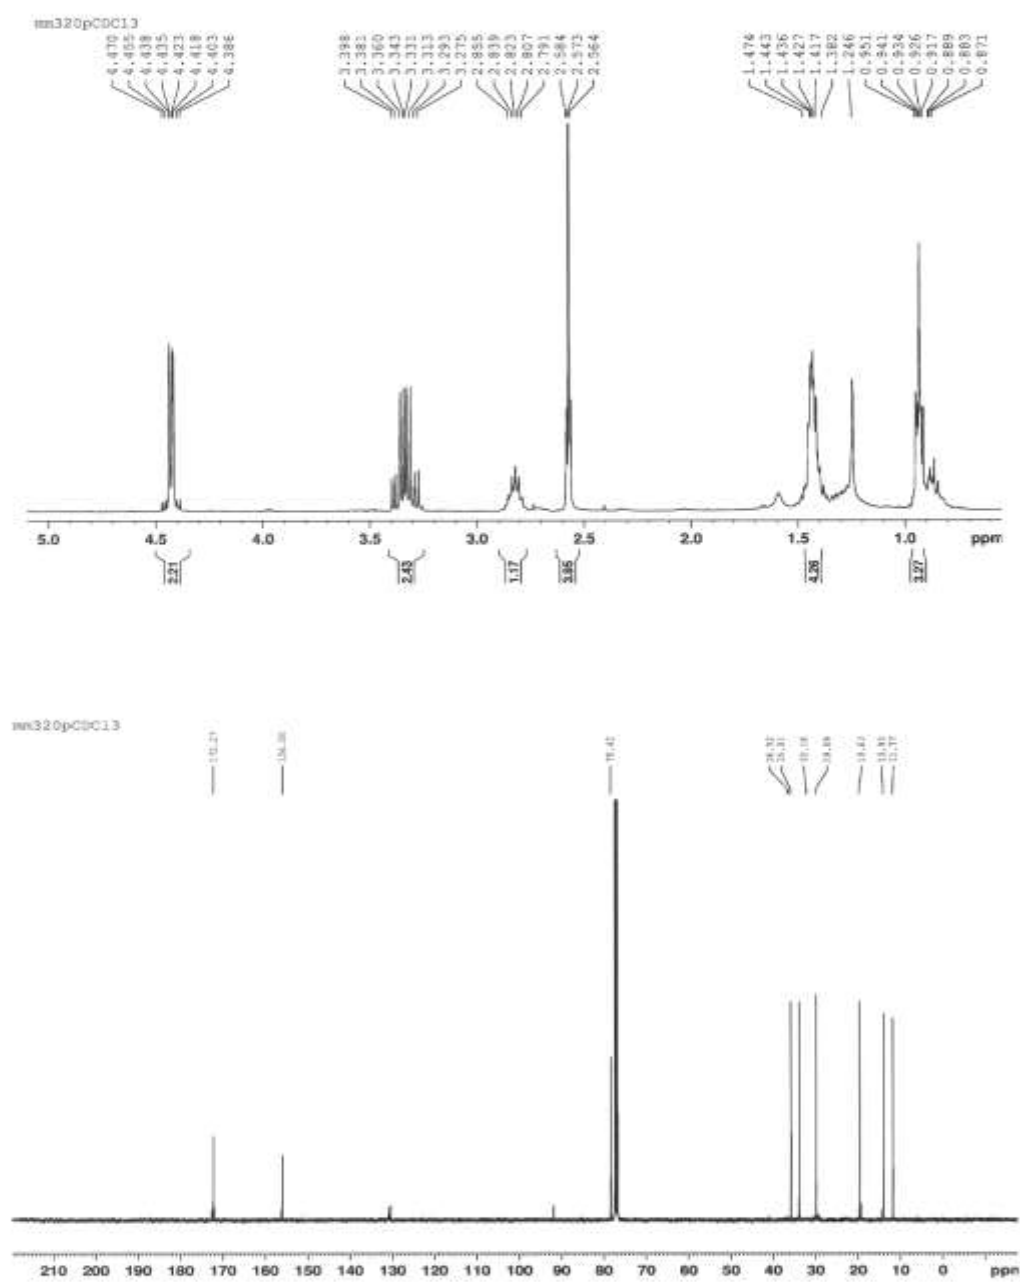

Compound 9c

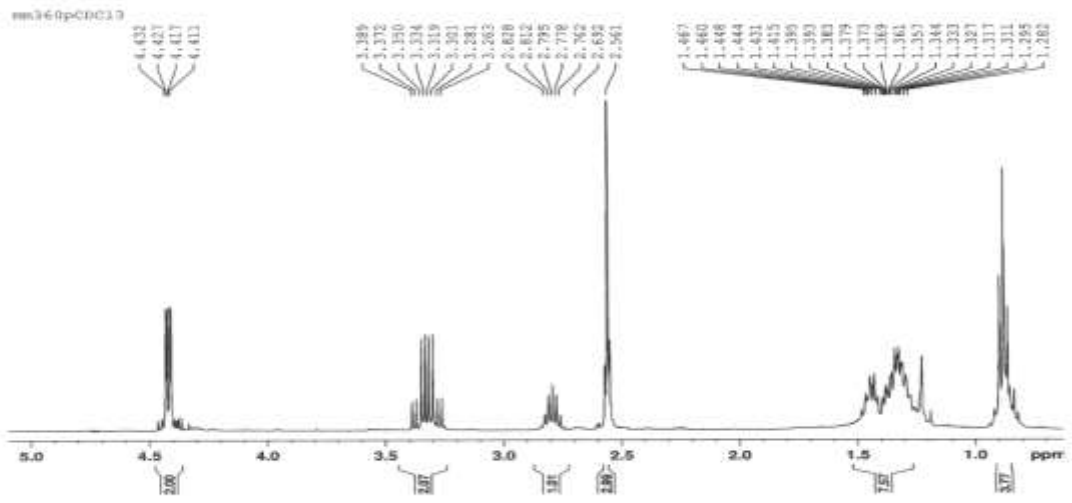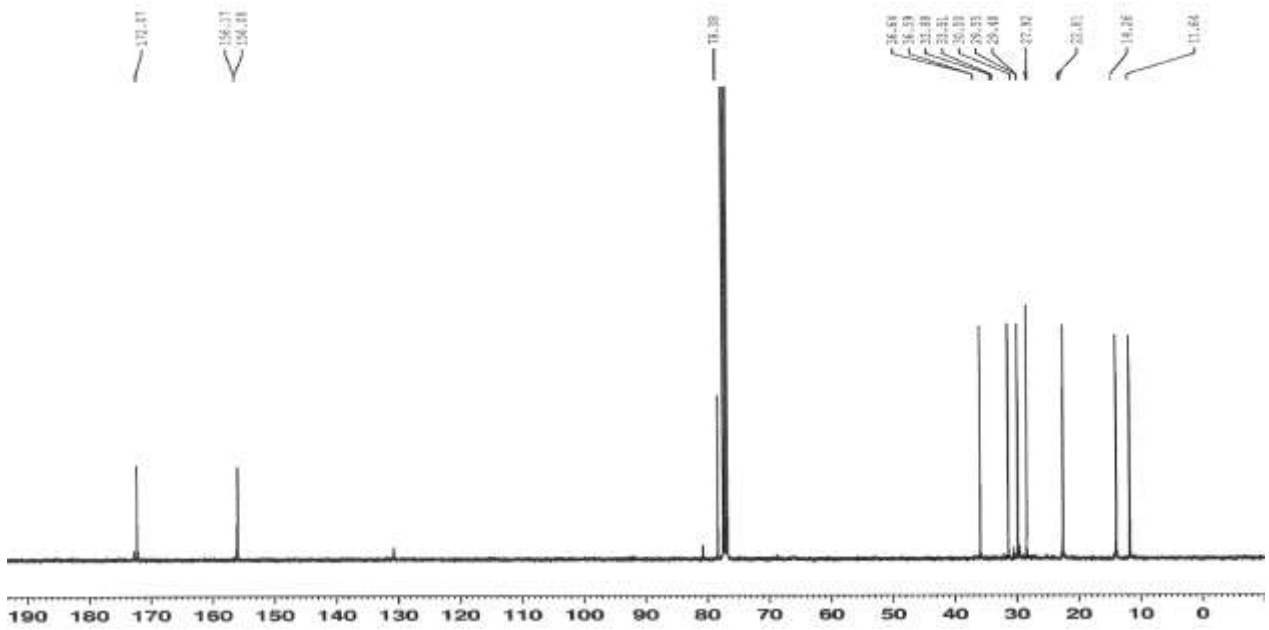





## Compound 9e

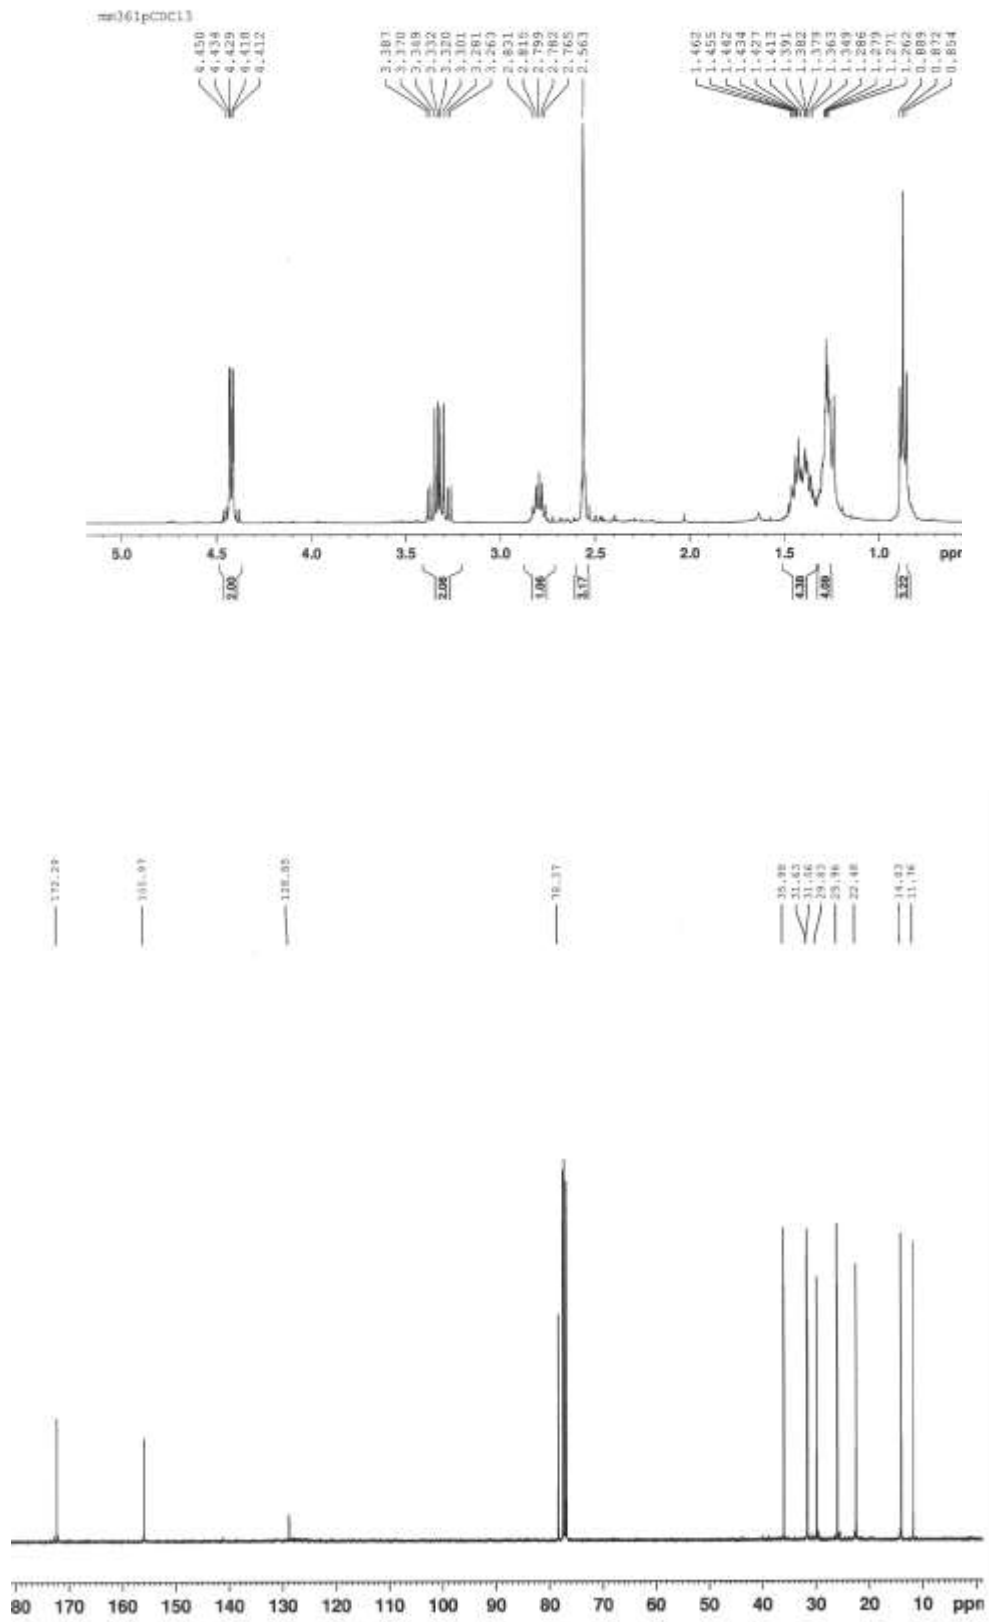

## Compound 9f

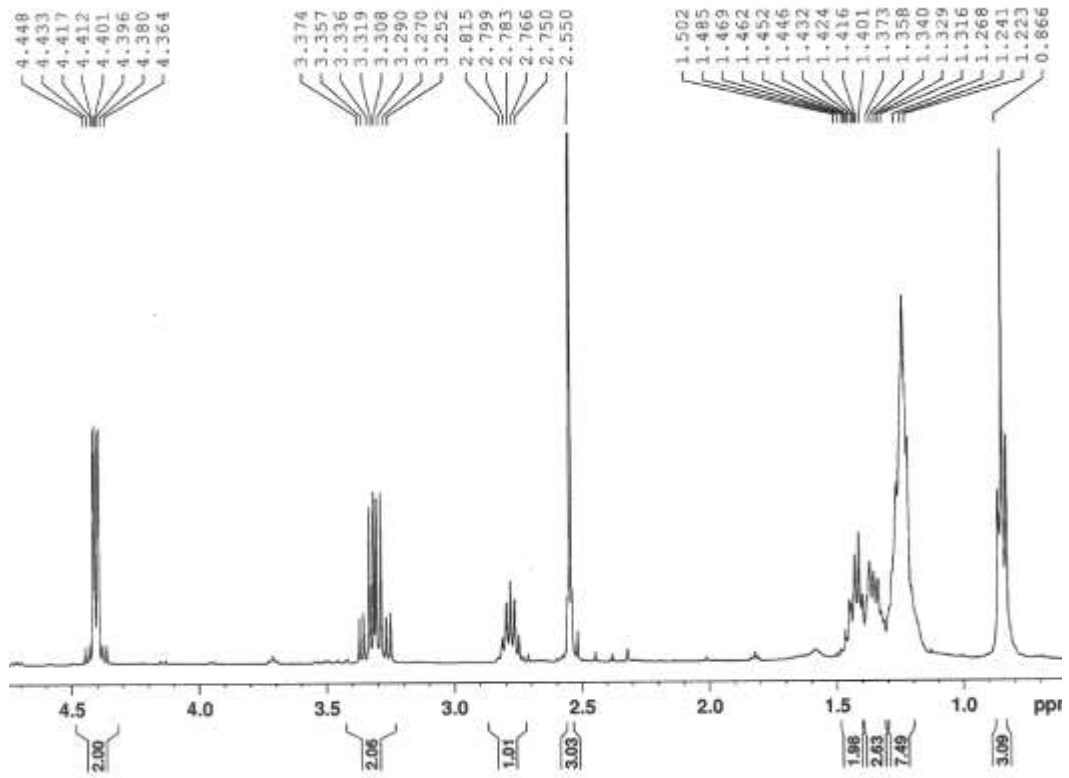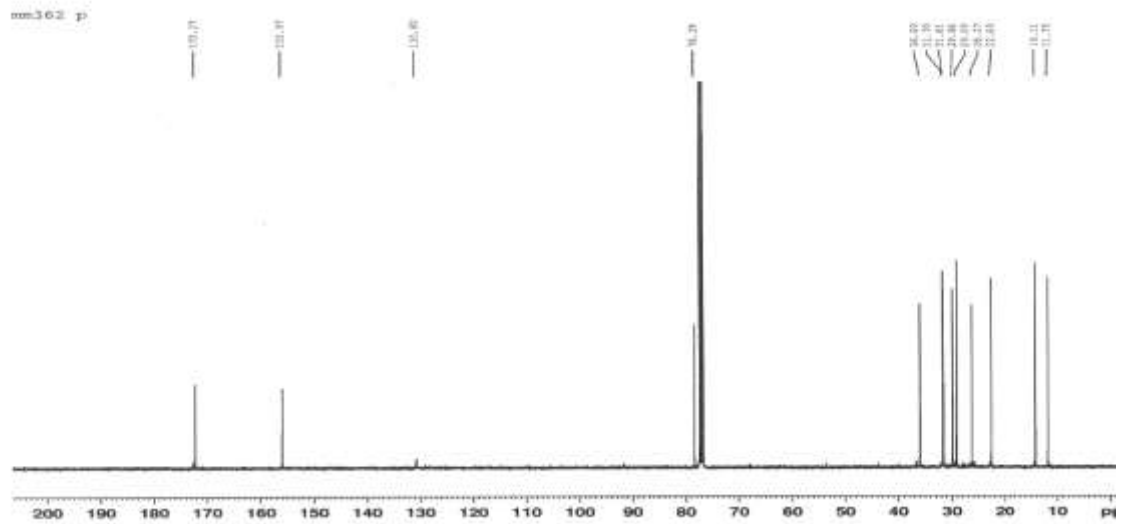

## Compound 9g

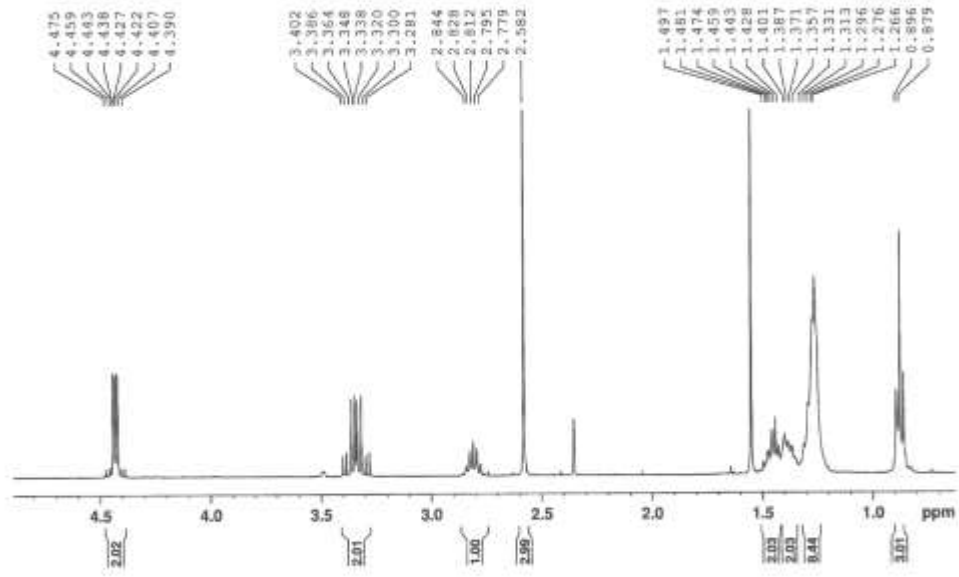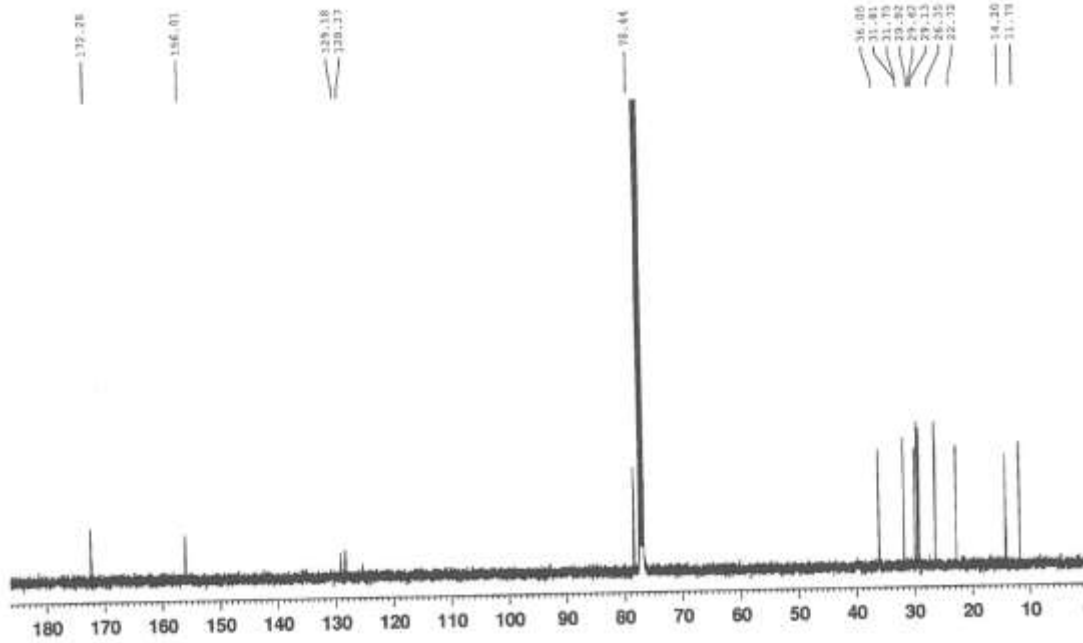

## Compound 9h

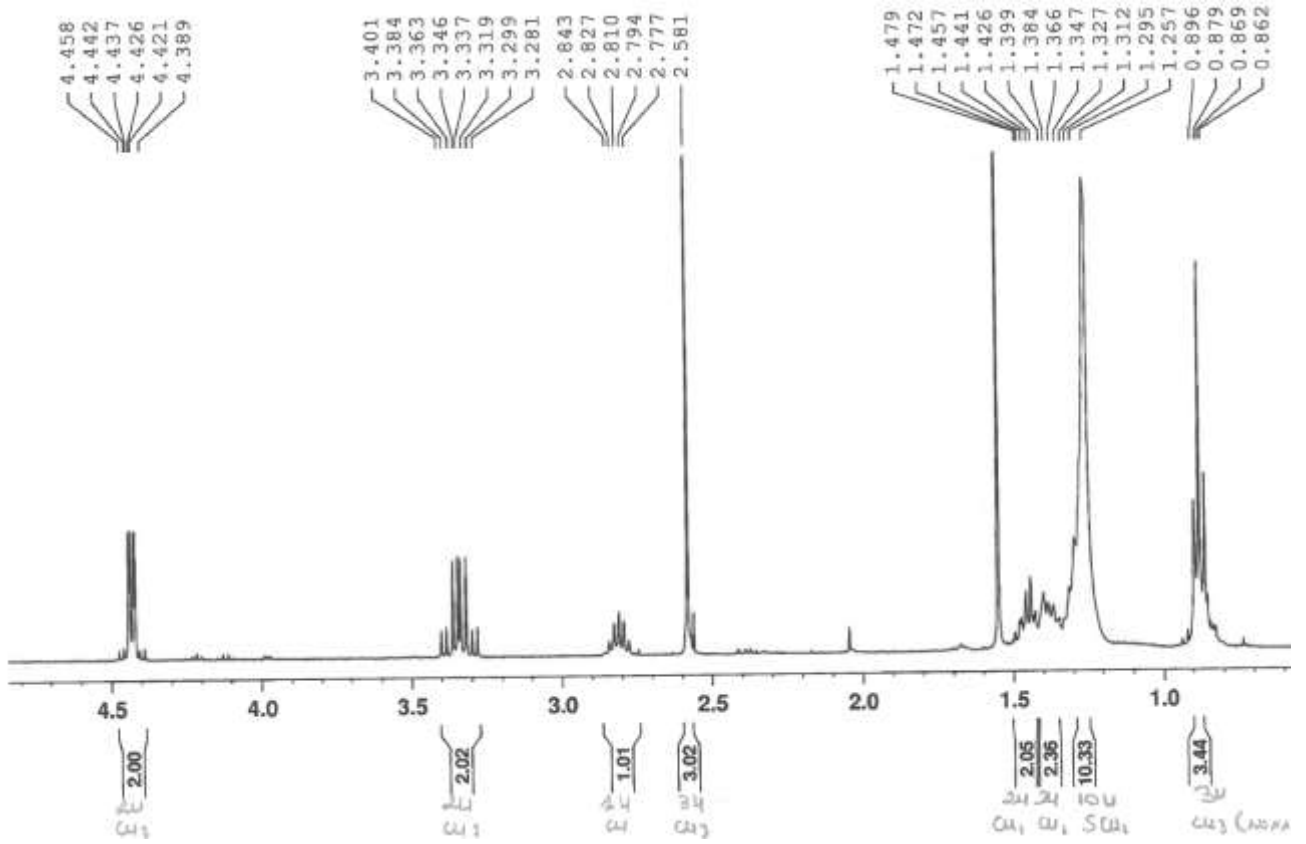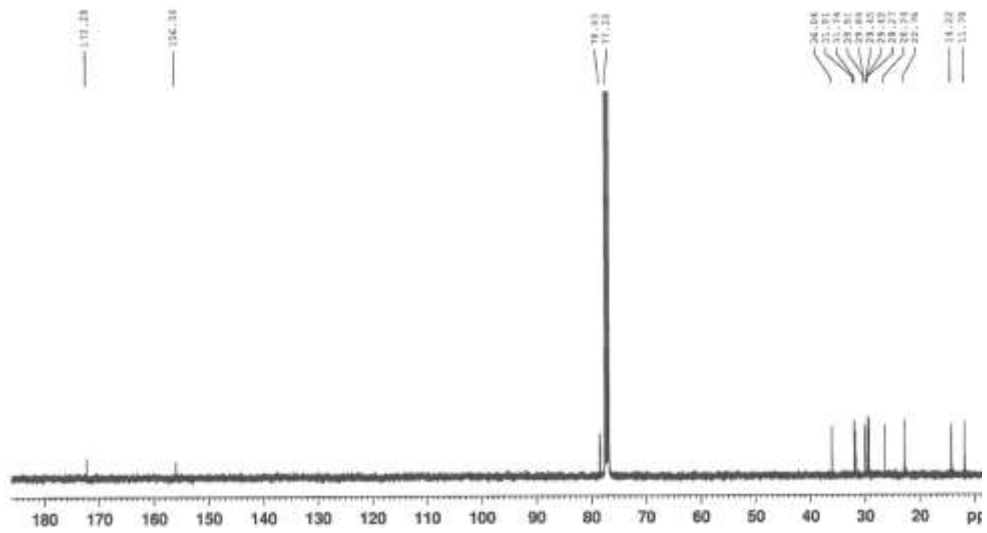

## Compound 9i

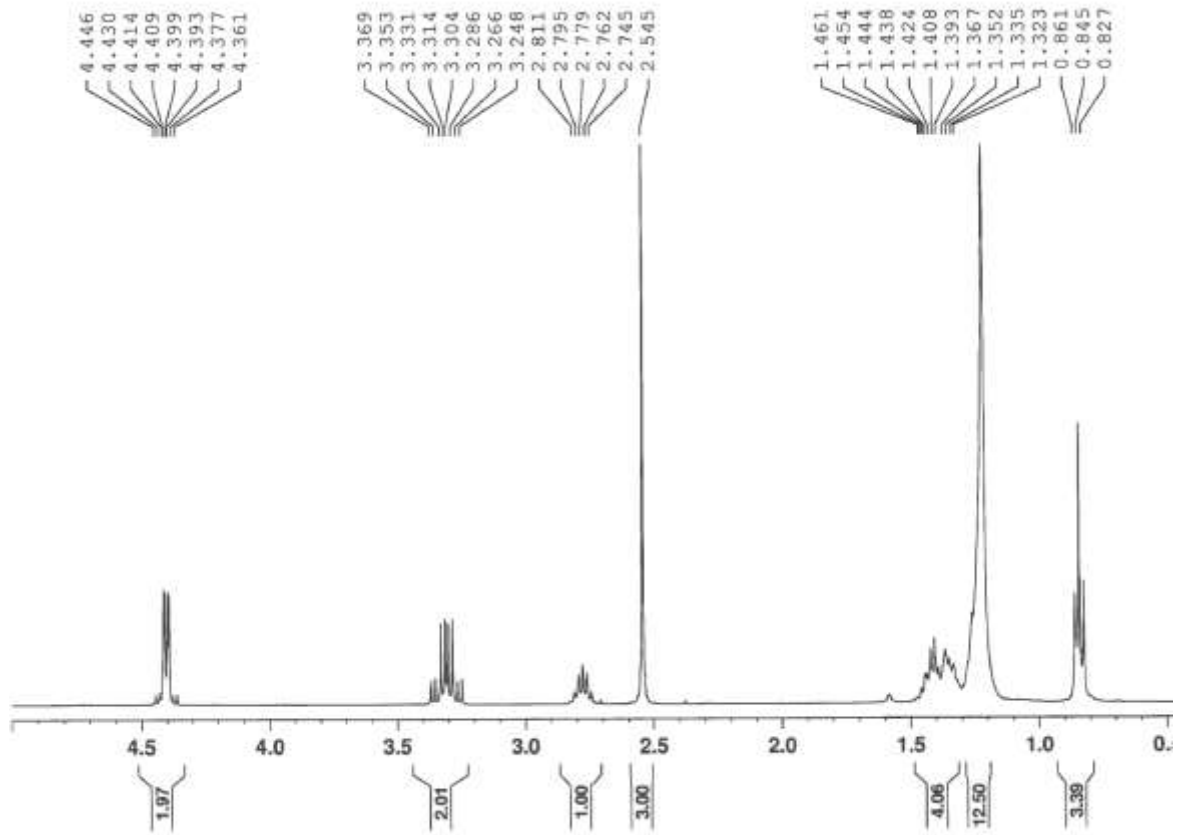

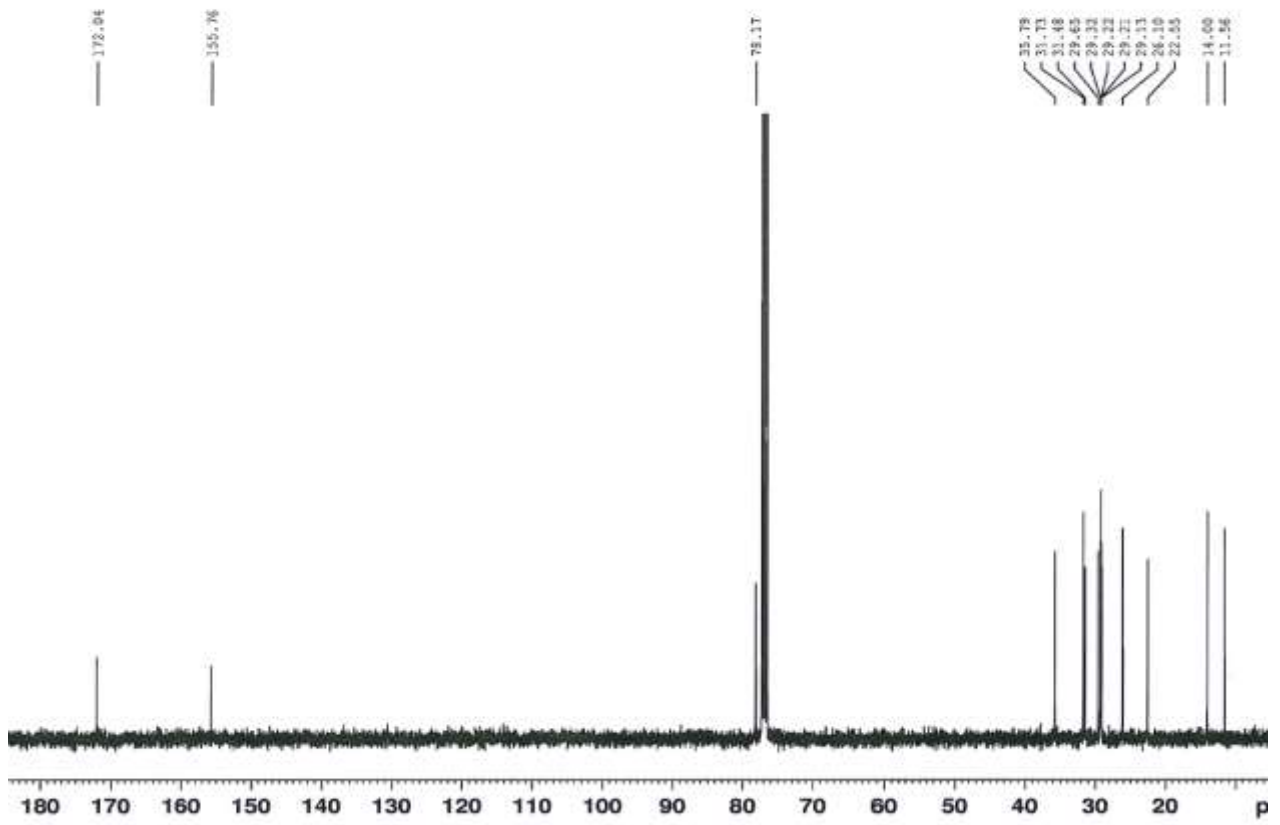

## Compound 10a

nm366pCDC13

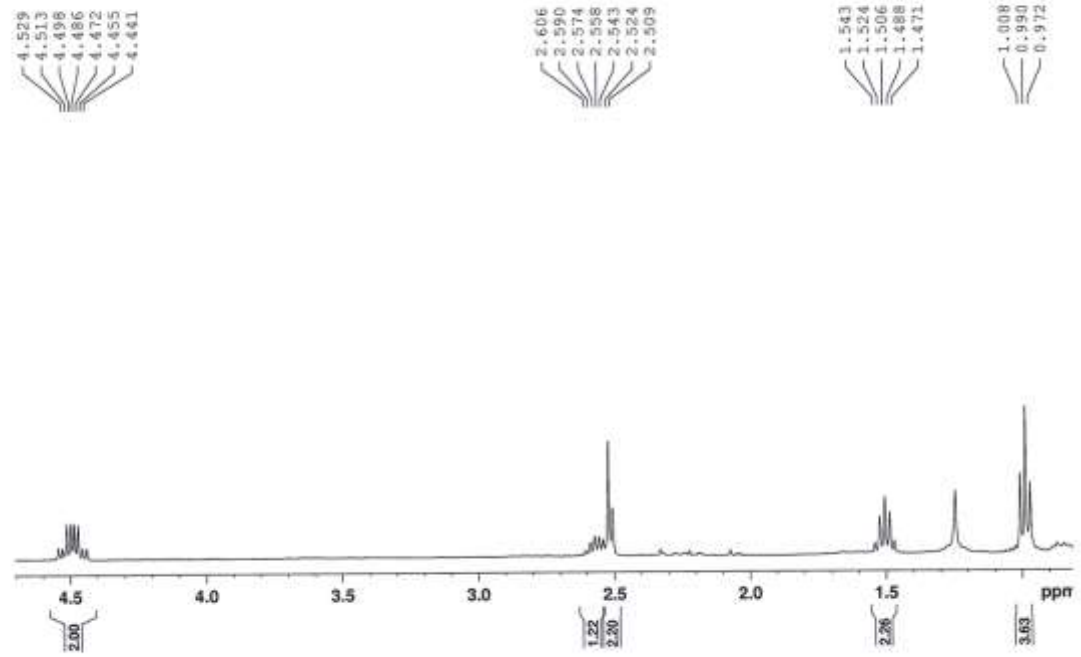

nm366pCDC13

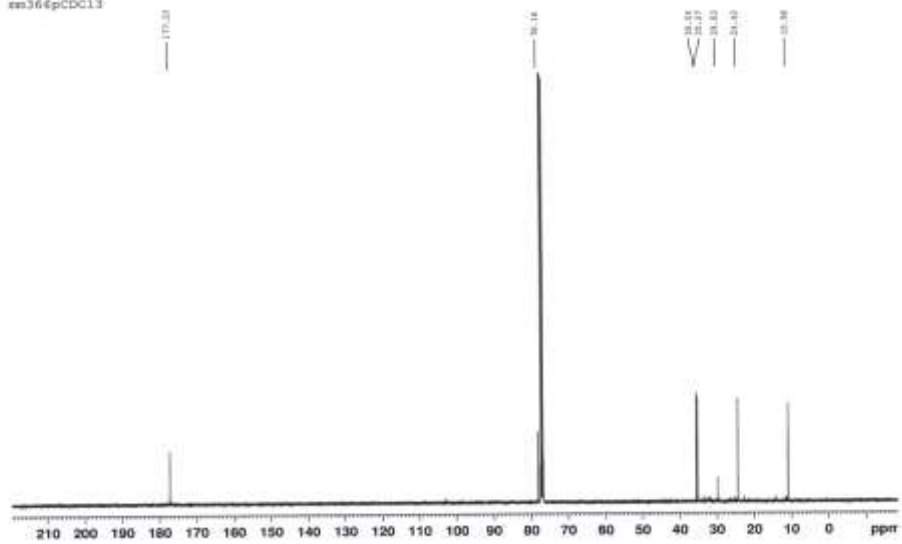



## Compound 10c

H<sub>2</sub>O 72pCOC13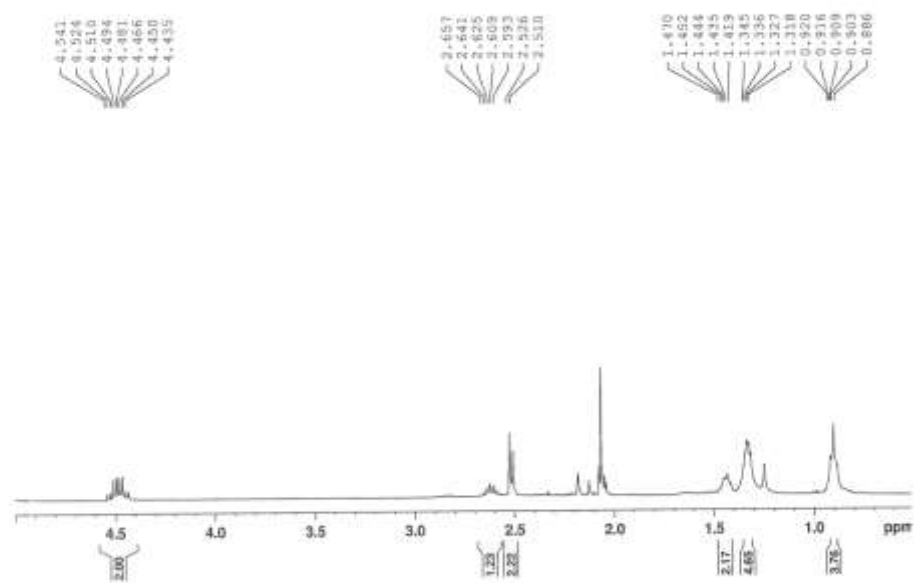H<sub>2</sub>O 72pCOC13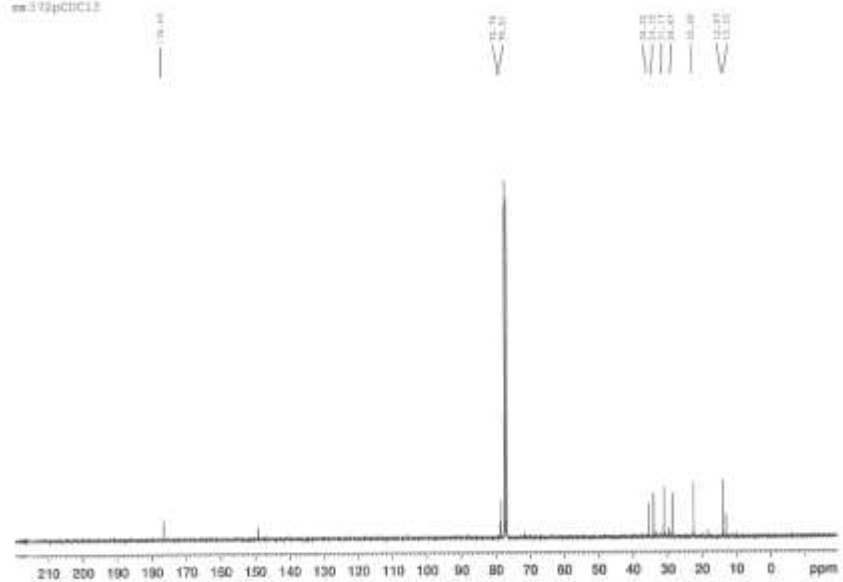

## Compound 10d

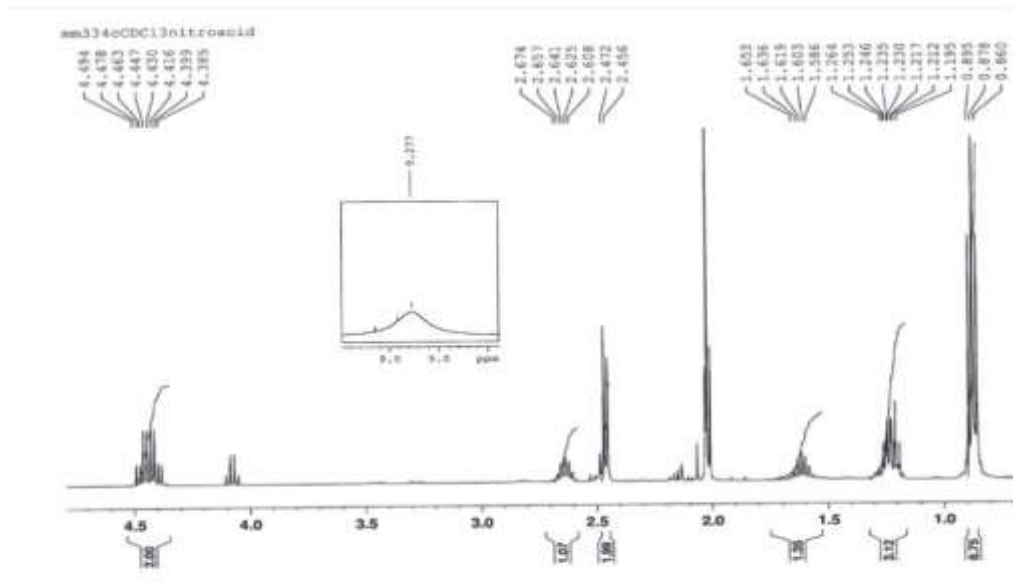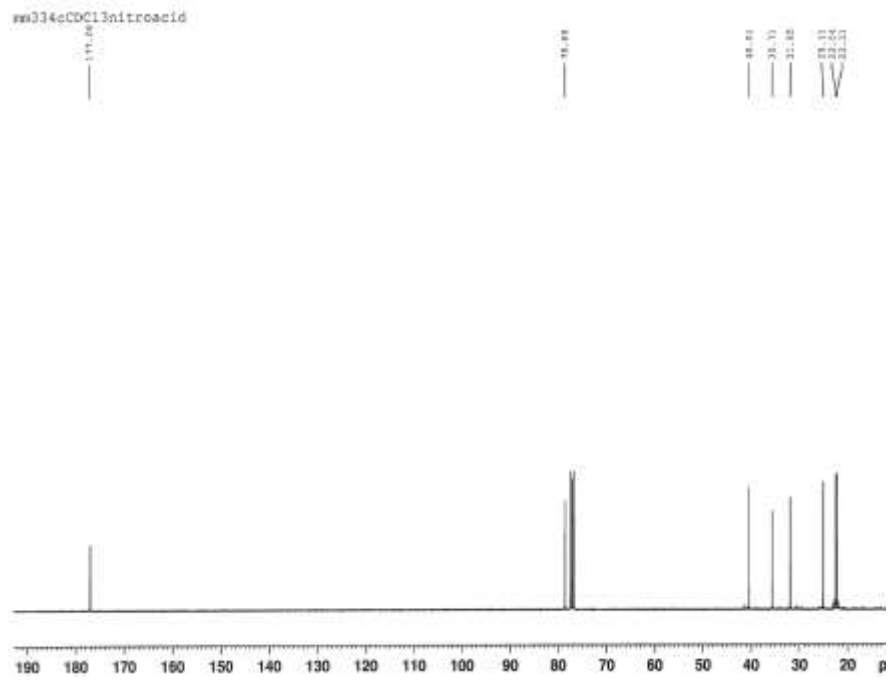

## Compound 10f

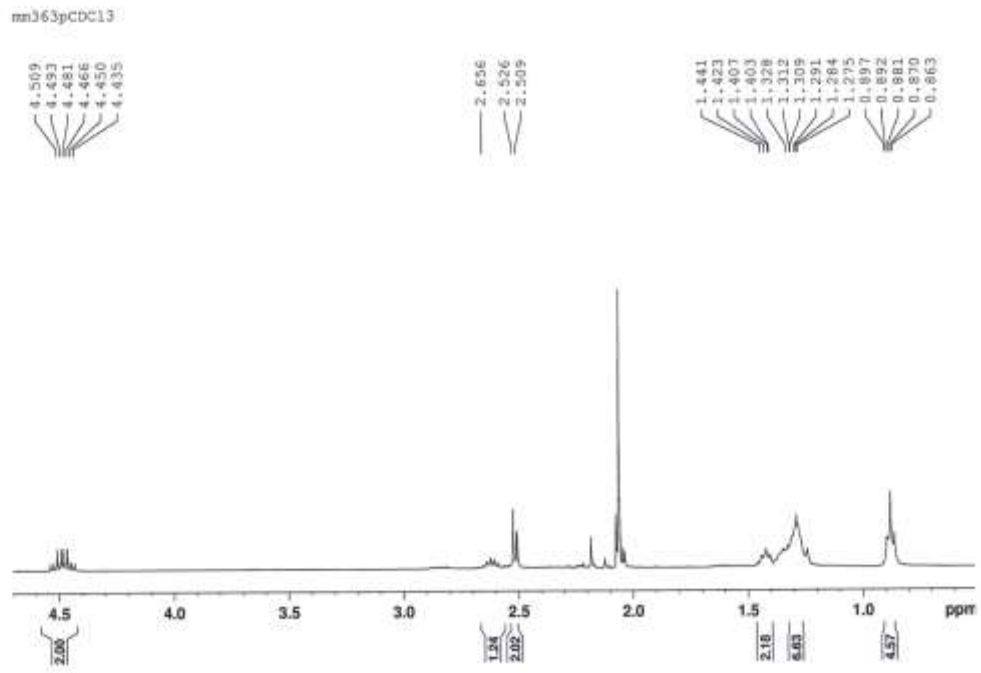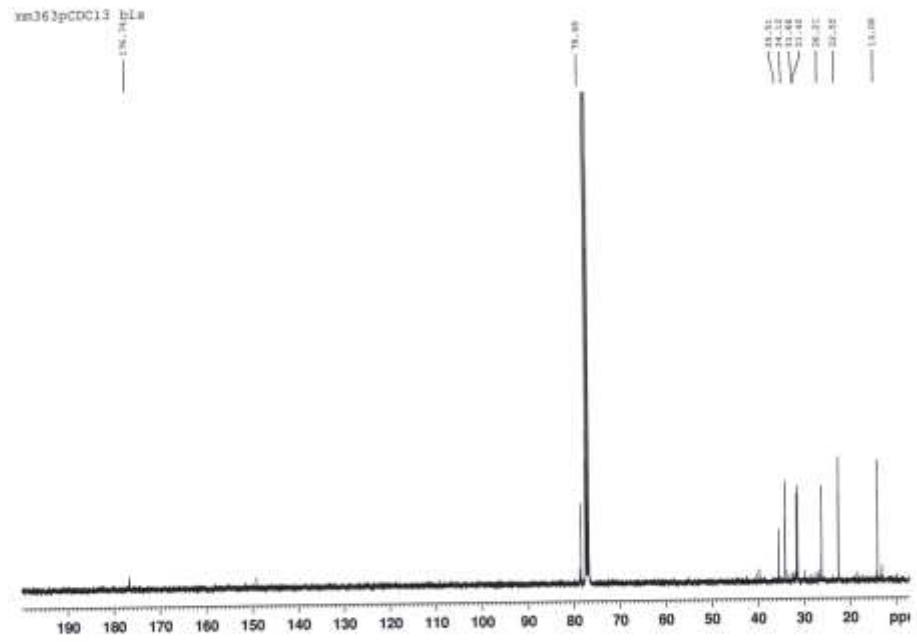

## Compound 10f

nm364pCDC13

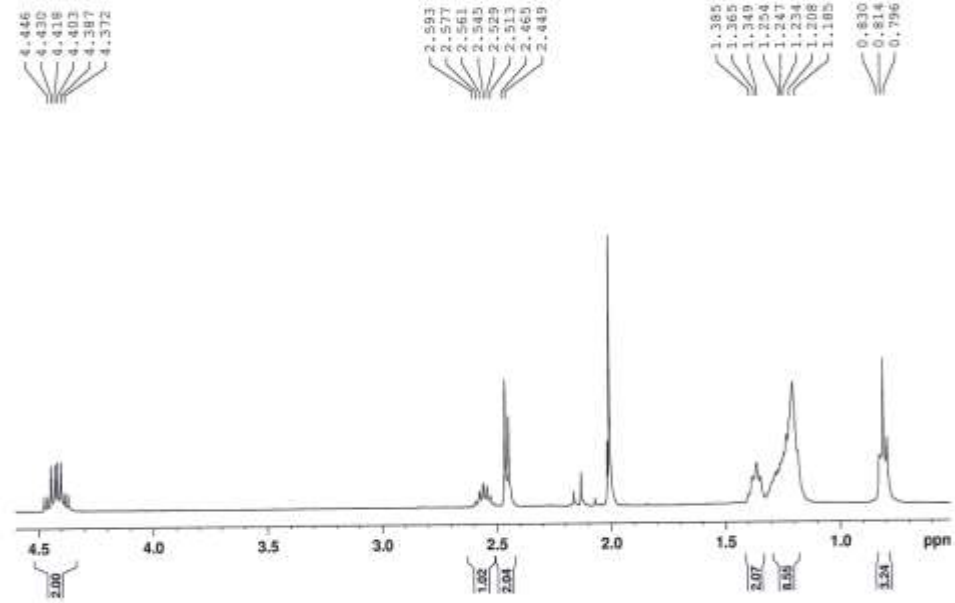

nm364pCDC13

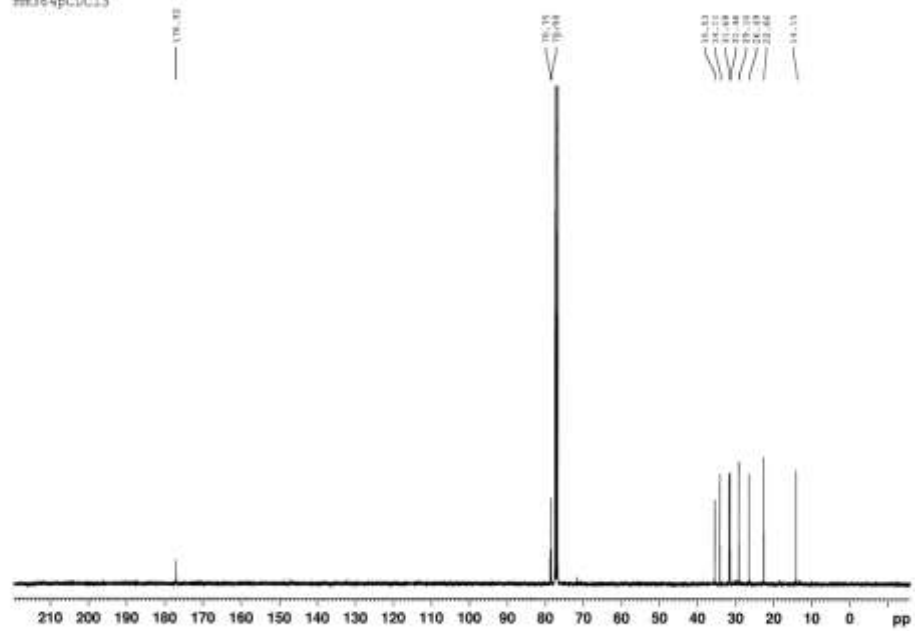



## Compound 9a

Raw Data File : C:\TOTALCHROM DATA\Results\Maria\gamma AA\AA10racemo.od.B10%.1ml.A.001.raw  
 Result File : C:\TOTALCHROM DATA\Results\Maria\gamma AA\AA10racemo.od.B10%.1ml.A.001.rst [Editing in Progress]  
 Inst Method : C:\TOTALCHROM DATA\Methods\B10%-1mL-40min from C:\TOTALCHROM DATA\Results\Maria\gamma AA\AA10racemo.od.B10%.1 ml.A.001.raw  
 Proc Method : C:\TOTALCHROM DATA\Methods\B10%-1mL-40min from C:\TOTALCHROM DATA\Results\Maria\gamma AA\AA10racemo.od.B10%.1 ml.A.001.rst [Editing in Progress]  
 Calib Method : C:\TOTALCHROM DATA\Methods\B10%-1mL-40min from C:\TOTALCHROM DATA\Results\Maria\gamma AA\AA10racemo.od.B10%.1ml.A.001.rst [Editing in Progress]  
 Report Format File: C:\PenExe\TcWS\Ver6.3.1\Config\User\manager\Default.rpt  
 Sequence File : C:\TOTALCHROM DATA\Sequences\AA10racemo.od.B10%.1ml.-.seq

## DEFAULT REPORT

| Peak # | Component Name | Time [min] | Area [ $\mu\text{V}\cdot\text{sec}$ ] | Height [ $\mu\text{V}$ ] | Area [%] | Norm. Area [%] | Cal. Range | Volt Range | BL  | Raw Amount | Adjusted Amount |
|--------|----------------|------------|---------------------------------------|--------------------------|----------|----------------|------------|------------|-----|------------|-----------------|
| 1      |                | 23.801     | 17722960.83                           | 468715.45                | 49.70    | 49.70          |            |            | *MM | 17.7080    | 17.7080         |
| 2      |                | 29.243     | 17808678.68                           | 359208.88                | 50.30    | 50.30          |            |            | *MM | 17.8247    | 17.8247         |
|        |                |            | 35532639.50                           | 827924.33                | 100.00   | 100.00         |            |            |     | 35.5326    | 35.5326         |

Missing Component Report  
 Component Expected Retention (Calibration File)

All components were found

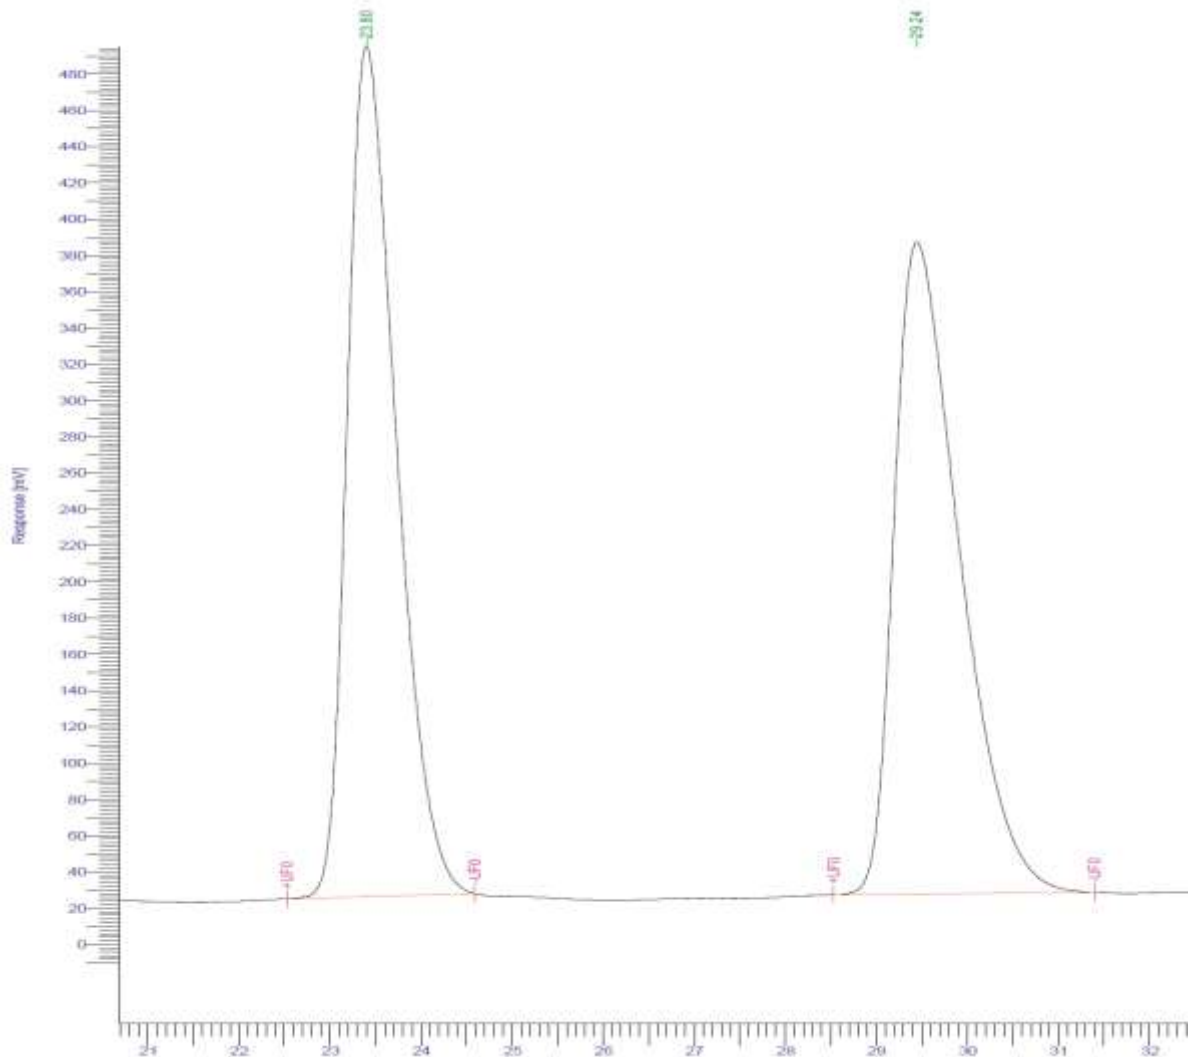

Page 1 of 1

```

Software Version : 6.3.1.0504
Operator : manager
Sample Number :
AutoSampler : SER200
Instrument Name : PerkinElmer LC
Instrument Serial #:
Delay Time : 0.00 min
Sampling Rate : 2.2727 pts/s
Sample Volume : 1.000000 uL
Sample Amount : 1.0000
Data Acquisition Time : 12/05/2013 14:07:01

Date : 12/05/2013 15:29:28
Sample Name : mm359p
Study :
Rack/Vial : 0/1
Channel : A
A/D m/V Range : 1000
End Time : 40.00 min

Area Reject : 0.000000
Dilution Factor : 1.00
Cycle : 1

Raw Data File : C:\TOTALCHROM DATA\Results\MariaGamma_AA\359pmmpropA.od.B10%.1ml.A.001.raw
Result File : C:\TOTALCHROM DATA\Results\MariaGamma_AA\359pmmpropA.od.B10%.1ml.A.001.rst [Editing In Progress]
Inst Method : C:\TOTALCHROM DATA\Methods\B10%-1mL-40min from C:\TOTALCHROM DATA\Results\MariaGamma_AA\359pmmpropA.od.B10%.1ml.A.001.raw
Proc Method : C:\TOTALCHROM DATA\Methods\B10%-1mL-40min from C:\TOTALCHROM DATA\Results\MariaGamma_AA\359pmmpropA.od.B10%.1ml.A.001.rst [Editing In Progress]
Cell Method : C:\TOTALCHROM DATA\Methods\B10%-1mL-40min from C:\TOTALCHROM DATA\Results\MariaGamma_AA\359pmmpropA.od.B10%.1ml.A.001.rst [Editing In Progress]
Report Format File : C:\PerExe\TcW\3\vers.3.1\Config\UsermanagerDefault.rpt
Sequence File : C:\TOTALCHROM DATA\Sequences\359pmmpropA.od.B10%.1ml.-.seq
  
```

### DEFAULT REPORT

| Peak # | Component Name | Time [min] | Area [uV*sec] | Height [uV] | Area [%] | Norm. Area [%] | Cal. Range | Volt Range | BL | Raw Amount | Adjusted Amount |
|--------|----------------|------------|---------------|-------------|----------|----------------|------------|------------|----|------------|-----------------|
| 1      |                | 23.877     | 12514955.11   | 195648.28   | 96.34    | 96.34          |            |            | MM | 12.5150    | 12.5150         |
| 2      |                | 29.113     | 474995.79     | 8422.94     | 3.66     | 3.66           |            |            | MM | 0.4750     | 0.4750          |
|        |                |            | 12989950.90   | 204071.22   | 100.00   | 100.00         |            |            |    | 12.9900    | 12.9900         |

Missing Component Report  
Component Expected Retention (Calibration File)  
All components were found

```

Sample Name : mm359p
Sample #:
Page 1 of 1
FileName : C:\TOTALCHROM DATA\Results\MariaGamma_AA\359pmmpropA.od.B10%.1ml.A.001.raw
Date : 12/05/2013 15:29:03
Method :
Time of Injection: 12/05/2013 14:07:01
Start Time : 20.58 min End Time : 32.44 min Low Point : -1.71 mAU High Point : 249.70 mAU
Plot Offset : -1.71 mAU Plot Scale : 251.4 mAU
  
```

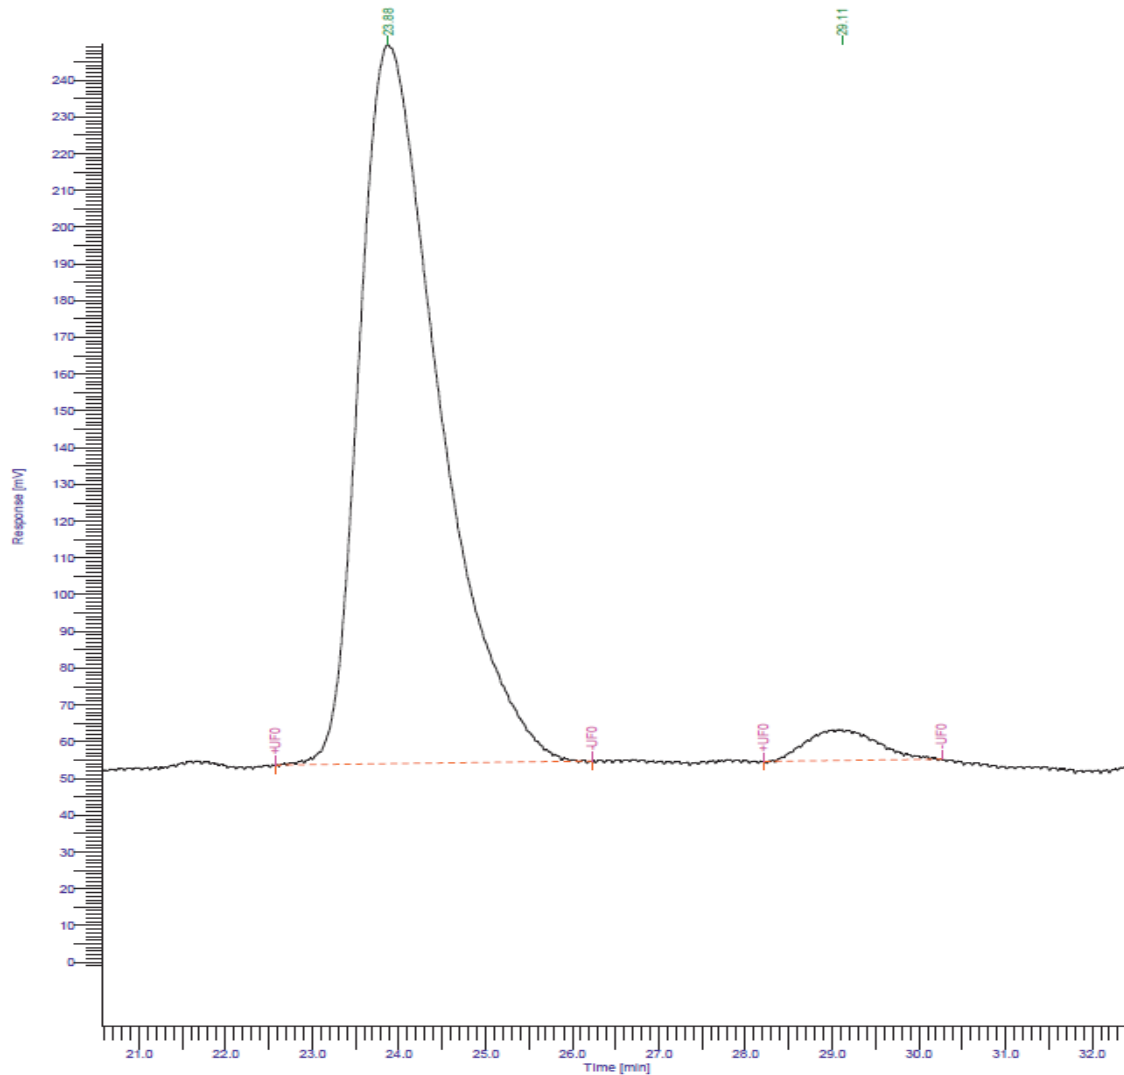

## Compound 9b

|                       |                     |                 |                     |
|-----------------------|---------------------|-----------------|---------------------|
| Software Version      | 6.3.1.0504          | Date            | 17/06/2013 10:54:04 |
| Operator              | manager             | Sample Name     | racemo buty         |
| Sample Number         |                     | Study           |                     |
| AutoSampler           | SER200              | Rack/vial       | 0/0                 |
| Instrument Name       | PerkinElmer LC      | Channel         | A                   |
| Instrument Serial #   | None                | ACD mV Range    | 1000                |
| Delay Time            | 0.00 min            | End Time        | 35.57 min           |
| Sampling Rate         | 2.2727 pts/s        |                 |                     |
| Sample Volume         | 1.000000 ul         | Area Reject     | 0.000000            |
| Sample Amount         | 1.0000              | Dilution Factor | 1.00                |
| Data Acquisition Time | 17/06/2013 10:17:11 | Cycle           | 1                   |

Raw Data File : c:\totalchrom\data\results\maria\gamma aa\mmbutyracemo (date123).od.b10%.1ml.a.001.raw <incomplete>  
 Inst Method : C:\TOTALCHROM\DATA\Methods\B10%-1mL-45min from c:\totalchrom\data\results\maria\gamma aa\mmbutyracemo (date123).od.b10%.1ml.a.001.raw  
 Proc Method : C:\TOTALCHROM\DATA\Methods\B10%-1mL-45min.mth from  
 Calib Method : C:\TOTALCHROM\DATA\Methods\B10%-1mL-45min.mth from  
 Report Format File : C:\PenExeTc\WS\Ver6.3.1\Config\User\manager\Default.rpt  
 Sequence File : C:\TOTALCHROM\DATA\Sequences\mmbutyracemo (date123).od.B10%.1ml.-.seq

## DEFAULT REPORT

| Peak # | Component Name | Time [min] | Area [uV*sec] | Height [uV] | Area [%] | Norm. Area [%] | Cal. Range | Volt Range | BL  | Raw Amount | Adjusted Amount |
|--------|----------------|------------|---------------|-------------|----------|----------------|------------|------------|-----|------------|-----------------|
| 1      |                | 22.594     | 6532258.24    | 109851.95   | 50.03    | 50.03          |            |            | *MM | 6.6323     | 6.6323          |
| 2      |                | 27.199     | 6623439.76    | 88900.08    | 49.97    | 49.97          |            |            | *MM | 6.6234     | 6.6234          |
|        |                |            | 13255698.00   | 198752.03   | 100.00   | 100.00         |            |            |     | 13.2557    | 13.2557         |

Missing Component Report  
 Component Expected Retention (Calibration File)

## Chromatogram

Sample Name : racemo buty Sample # : Page 1 of 1  
 Parameters : c:\totalchrom\data\results\maria\gamma aa\mmbutyracemo (date123).od.b10%.1ml.a.001.raw <incomplete>  
 Date : 17/06/2013 10:54:33  
 Method : B10%-1mL-45min.mth Time of Injection : 17/06/2013 10:17:11  
 Start Time : 19.55 min End Time : 31.83 min Low Pass : -1.31 mAU High Pass : 128.81 mAU  
 Ret Offset : -1.31 mAU Ret Scale : 128.3 mAU

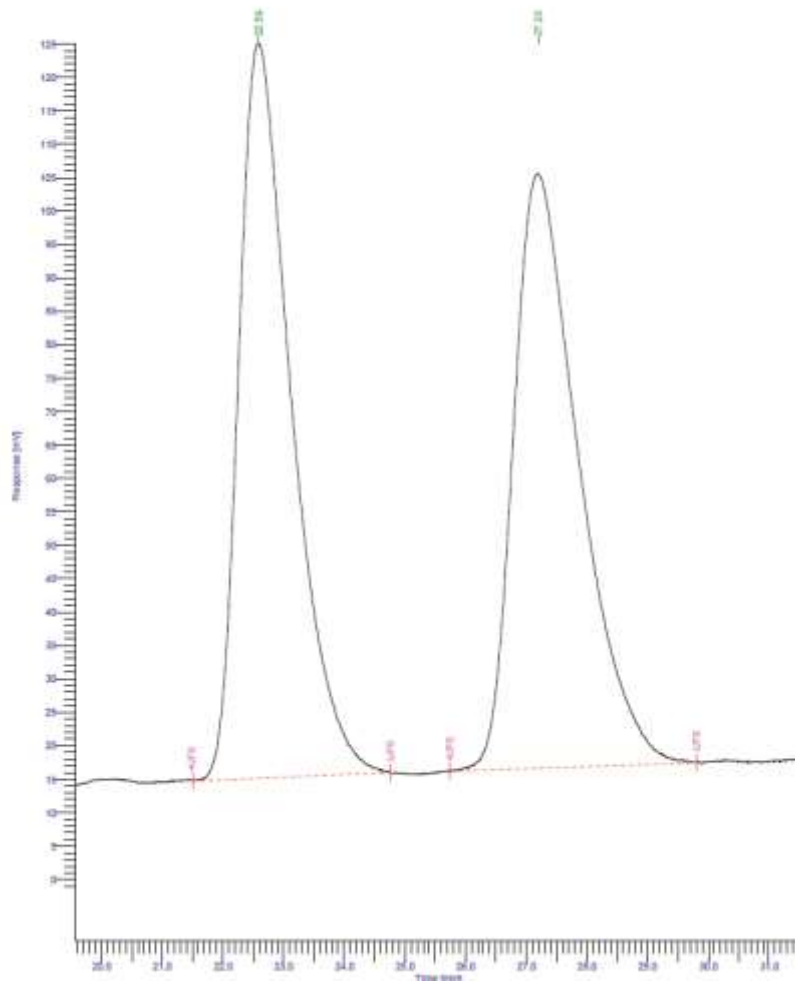



```

Software Version : 6.3.1.0504
Operator : manager
Sample Number :
AutoSampler : SER200
Instrument Name : PerkinElmer LC
Instrument Serial # : None
Delay Time : 0.00 min
Sampling Rate : 2.2727 pts/s
Sample Volume : 1.000000 ul
Sample Amount : 1.0000
Data Acquisition Time : 23/07/2013 10:25:26
Date : 23/07/2013 10:54:38
Sample Name : AA11buty
Study :
Rack/Vial : 0/0
Channel : A
A/D mV Range : 1000
End Time : 25.97 min
Area Reject : 0.000000
Dilution Factor : 1.00
Cycle : 1
    
```

```

Raw Data File : c:\totalchrom\data\results\maria\gamma\aa1aa11buty.od.b10%.1ml.a.001.raw <incomplete>
Inst Method : C:\TOTALCHROM\DATA\Methods\B10%-1mL-35min from c:\totalchrom\data\results\maria\gamma\aa1aa11buty.od.b10%.1ml.a.001.raw
Proc Method : C:\TOTALCHROM\DATA\Methods\B10%-1mL-35min.mth from
Calib Method : C:\TOTALCHROM\DATA\Methods\B10%-1mL-35min.mth from
Report Format File : C:\PerkinElmer\Tc\SW\Ver6.3.1\Config\User\manager\Default.rpt
Sequence File : C:\TOTALCHROM\DATA\Sequences\blanco23\ulymm.od.B10%.1ml-.seq
    
```

### DEFAULT REPORT

| Peak # | Component Name | Time [min] | Area [uV*sec] | Height [uV] | Area [%] | Norm. Area [%] | Cal. Volt Range | Raw Amount | Adjusted Amount |
|--------|----------------|------------|---------------|-------------|----------|----------------|-----------------|------------|-----------------|
| 1      |                | 19.169     | 54715701.16   | 916129.20   | 93.32    | 93.32          | MM              | 54.7157    | 54.7157         |
| 2      |                | 23.129     | 3916337.26    | 73461.06    | 6.68     | 6.68           | MM              | 3.9163     | 3.9163          |
|        |                |            | 58632038.43   | 989590.25   | 100.00   | 100.00         |                 | 58.6320    | 58.6320         |

Missing Component Report  
 Component Expected Retention (Calibration File)  
 All components were found

```

Sample Name : AA11buty
File Name : c:\totalchrom\data\results\maria\gamma\aa1aa11buty.od.b10%.1ml.a.001.raw <incomplete>
Date : 23/07/2013 10:55:09
Method : B10%-1mL-35min.mth
Start Time : 16.76 min
Plot Offset : -42.65 mAU
Sample #:
Page 1 of 1
Time of Injection : 23/07/2013 10:25:26
End Time : 25.97 min
Low Point : -42.65 mAU
High Point : 934.29 mAU
Plot Scale : 977.1 mAU
    
```

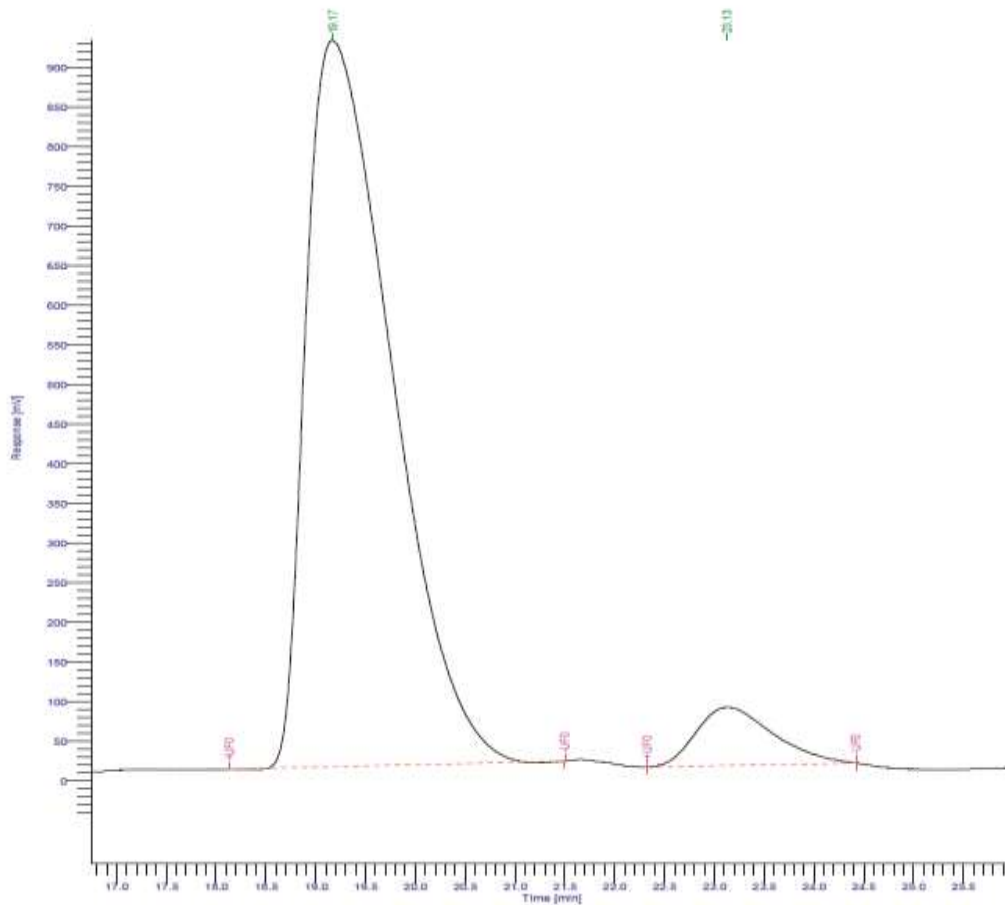

## Compound 9c

|                       |                       |                 |                       |
|-----------------------|-----------------------|-----------------|-----------------------|
| Software Version      | : 6.3.1.0504          | Date            | : 31/05/2013 17:20:53 |
| Operator              | : manager             | Sample Name     | : racemval            |
| Sample Number         | :                     | Study           | :                     |
| AutoSampler           | : SER200              | Rack/Vial       | : 0/1                 |
| Instrument Name       | : PerkinElmer LC      | Channel         | : A                   |
| Instrument Serial #   | : None                | A/D mV Range    | : 1000                |
| Delay Time            | : 0.00 min            | End Time        | : 29.99 min           |
| Sampling Rate         | : 2.2727 pts/s        | Area Reject     | : 0.000000            |
| Sample Volume         | : 1.000000 ul         | Dilution Factor | : 1.00                |
| Sample Amount         | : 1.0000              | Cycle           | : 1                   |
| Data Acquisition Time | : 31/05/2013 16:44:48 |                 |                       |

Raw Data File : C:\TOTALCHROM DATA\Results\MariaIgamma AA\mmracemval.ad.B2%.0.75.ml.A.001.raw  
 Result File : C:\TOTALCHROM DATA\Results\MariaIgamma AA\mmracemval.ad.B2%.0.75.ml.A.001.rst [Editing in Progress]  
 Inst Method : C:\TOTALCHROM DATA\Methods\B2%-0.75mL-30min from C:\TOTALCHROM DATA\Results\MariaIgamma AA\mmracemval.ad.B2%.0.75.ml.A.001.raw  
 Proc Method : C:\TOTALCHROM DATA\Methods\B2%-0.75mL-30min from C:\TOTALCHROM DATA\Results\MariaIgamma AA\mmracemval.ad.B2%.0.75.ml.A.001.rst [Editing in Progress]  
 Calib Method : C:\TOTALCHROM DATA\Methods\B2%-0.75mL-30min from C:\TOTALCHROM DATA\Results\MariaIgamma AA\mmracemval.ad.B2%.0.75.ml.A.001.rst [Editing in Progress]  
 Report Format File : C:\PenEx\Tc\W\Ver6.3.1\Config\User\manager\Default.rpt  
 Sequence File : C:\TOTALCHROM DATA\Sequences\mmracemval.ad.B2%.0.75.ml.-.seq

## DEFAULT REPORT

| Peak # | Component Name | Time [min] | Area [uV*sec] | Height [uV] | Area [%] | Norm. Area [%] | Cal. Range | Volt Range | BL  | Raw Amount | Adjusted Amount |
|--------|----------------|------------|---------------|-------------|----------|----------------|------------|------------|-----|------------|-----------------|
| 1      |                | 21.941     | 6287548.94    | 186949.92   | 50.41    | 50.41          |            |            | *MM | 6.2875     | 6.2875          |
| 2      |                | 24.574     | 6181519.17    | 160710.50   | 49.56    | 49.56          |            |            | *MM | 6.1815     | 6.1815          |
| 3      |                | 29.700     | 3276.32       | 419.23      | 0.03     | 0.03           |            |            | *MM | 0.0033     | 0.0033          |
|        |                |            | 12472344.43   | 348079.64   | 100.00   | 100.00         |            |            |     | 12.4723    | 12.4723         |

## Chromatogram

Sample Name : racemval Sample # : Page 1 of 1  
 FileName : C:\TOTALCHROM DATA\Results\MariaIgamma AA\mmracemval.ad.B2%.0.75.ml.A.001.raw  
 Date : 31/05/2013 17:21:04  
 Method : Time of Injection: 31/05/2013 16:44:48  
 Start Time : 20.47 min End Time : 28.07 min Low Point : -1.82 mAU High Point : 201.16 mAU  
 Plot Offset : -1.82 mAU Plot Scale: 200.0 mAU

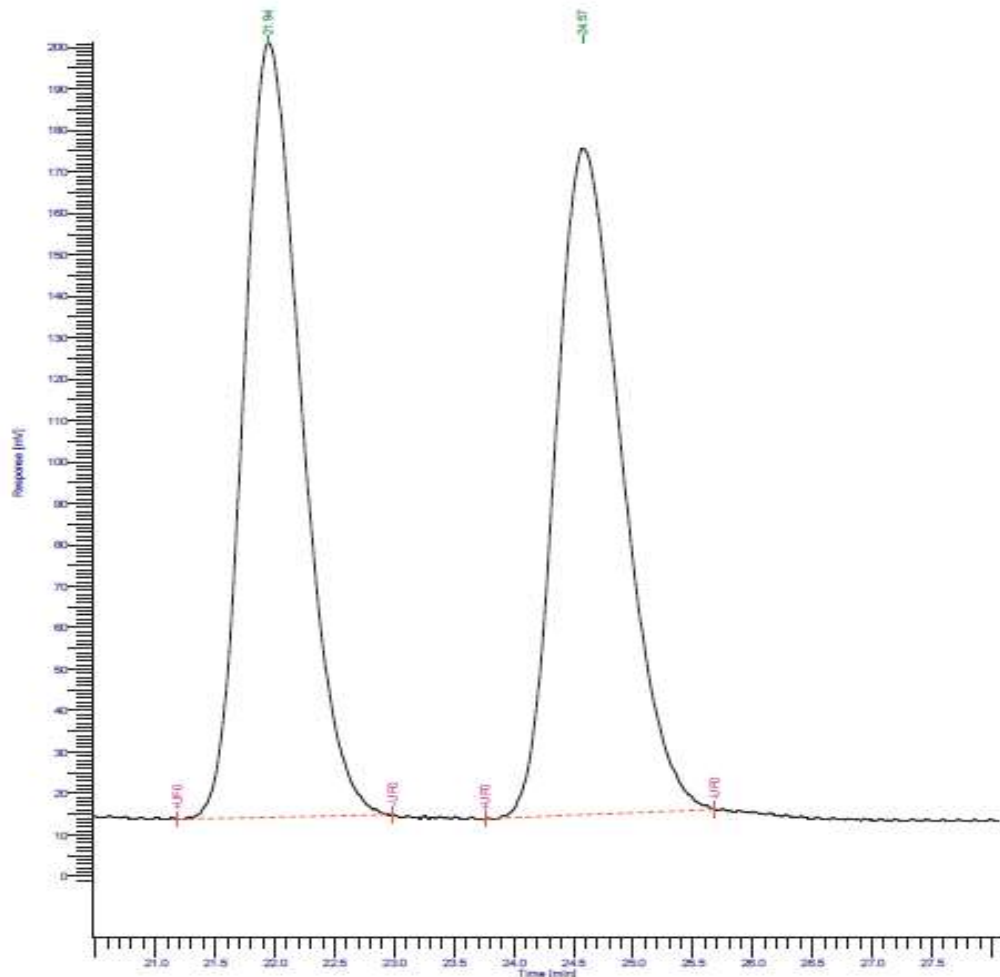

Software Version : 6.3.1.0504 Date : 26/04/2013 15:32:54  
 Operator : manager Sample Name : mm360p  
 Sample Number : : Study : :  
 AutoSampler : SER200 Rack/Vial : 0/0  
 Instrument Name : PerkinElmer LC Channel : B  
 Instrument Serial # : None A/D mV Range : 1000  
 Delay Time : 0.00 min End Time : 25.30 min  
 Sampling Rate : 2.2727 pts/s  
 Sample Volume : 1.000000 ul  
 Sample Amount : 1.0000 Area Reject : 0.000000  
 Data Acquisition Time : 26/04/2013 15:04:13 Dilution Factor : 1.00  
 Cycle : 1

Raw Data File : c:\totalchrom\data\results\maria\gamma\gamma\mm360p\vala.ad.b2%.0.75ml.b.001.raw <incomplete>  
 Inst Method : C:\TOTALCHROM\DATA\Methods\B2%-0.75mL-35min from c:\totalchrom\data\results\maria\gamma\gamma\mm360p\vala.ad.b2%.0.75ml.b.001.raw

Proc Method : C:\TOTALCHROM\DATA\Methods\B2%-0.75mL-35min.mth from

Calib Method : C:\TOTALCHROM\DATA\Methods\B2%-0.75mL-35min.mth from

Report Format File : C:\PenExe\TCWS\Ver6.3.1\Config\User\manager\Default.rpt

Sequence File : C:\TOTALCHROM\DATA\Sequences\mm360p\ValA.ad.B2%.0.75ml...seq

## DEFAULT REPORT

| Peak # | Component Name | Time [min] | Area [uV*sec] | Height [uV] | Area [%] | Norm. Area [%] | Cal. Range | Volt Range | BL | Raw Amount | Adjusted Amount |
|--------|----------------|------------|---------------|-------------|----------|----------------|------------|------------|----|------------|-----------------|
| 1      |                | 21.443     | 7234762.04    | 219365.74   | 93.98    | 93.98          |            |            | MM | 7.2348     | 7.2348          |
| 2      |                | 24.097     | 463819.33     | 13224.32    | 6.02     | 6.02           |            |            | MM | 0.4638     | 0.4638          |
|        |                |            | 7698580.37    | 232590.06   | 100.00   | 100.00         |            |            |    | 7.6986     | 7.6986          |

### Chromatogram

Sample Name : mm360p Sample #: Page 1 of 1  
 FileName : c:\totalchrom\data\results\maria\gamma\gamma\mm360p\vala.ad.b2%.0.75ml.b.001.raw <incomplete>  
 Date : 26/04/2013 15:32:48 Time of Injection : 26/04/2013 15:04:13  
 Method : B2%-0.75mL-35min.mth Start Time : 20.25 min End Time : 25.30 min Low Point : 0.67 mAU High Point : 230.93 mAU  
 Plot Offset : 0.67 mAU Plot Scale : 230.3 mAU

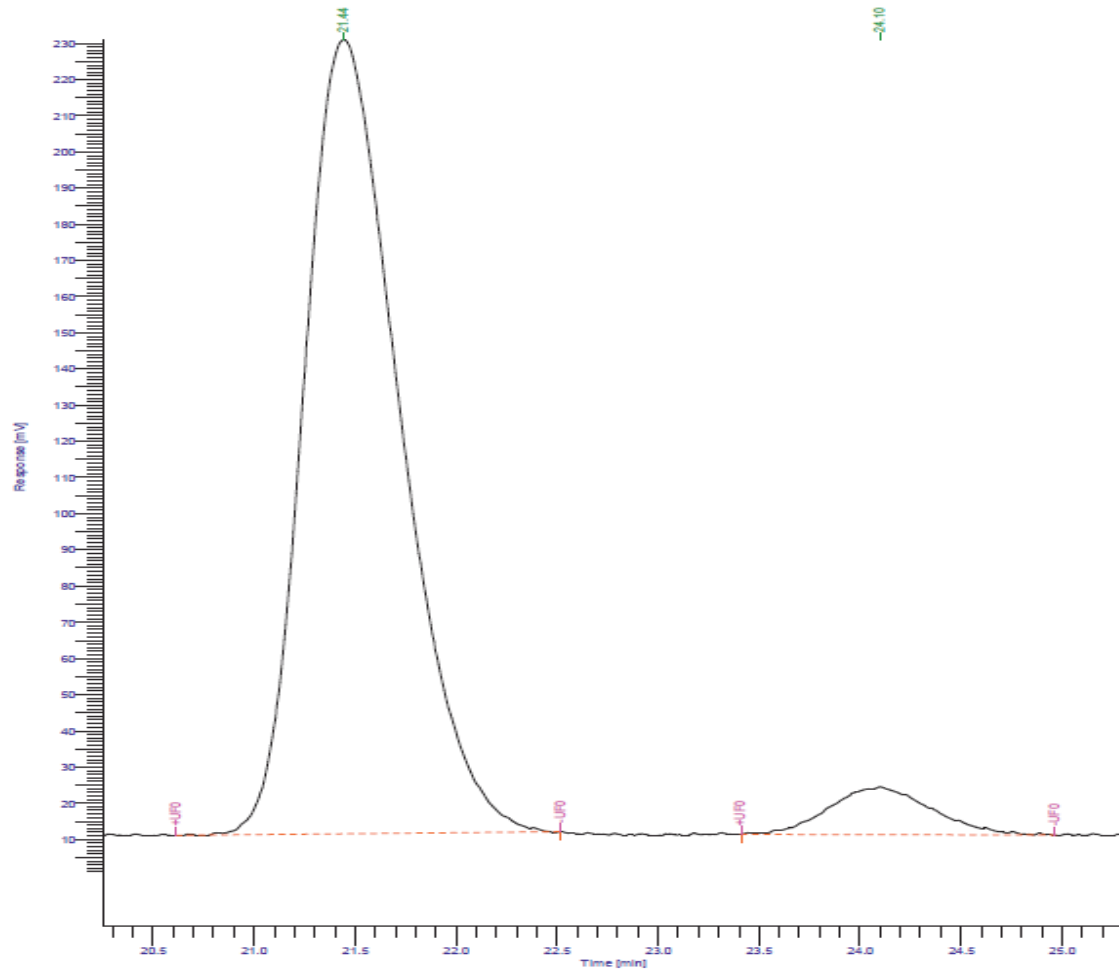

## Compound 9d

|                                             |                            |
|---------------------------------------------|----------------------------|
| Software Version : 6.3.1.0504               | Date : 22/07/2013 16:33:04 |
| Operator : manager                          | Sample Name : mm382p       |
| Sample Number :                             | Study :                    |
| AutoSampler : SER200                        | Rack/Vial : 0/1            |
| Instrument Name : PerkinElmer LC            | Channel : A                |
| Instrument Serial # : None                  | A/D mV Range : 1000        |
| Delay Time : 0.00 min                       | End Time : 40.00 min       |
| Sampling Rate : 2.2727 pts/s                |                            |
| Sample Volume : 1.000000 ul                 | Area Reject : 0.000000     |
| Sample Amount : 1.0000                      | Dilution Factor : 1.00     |
| Data Acquisition Time : 22/07/2013 14:04:27 | Cycle : 1                  |

Raw Data File : C:\TOTALCHROM DATA\Results\Maria\gamma AA\mm382p od.B5%.1ml.A.001.raw  
 Result File : C:\TOTALCHROM DATA\Results\Maria\gamma AA\mm382p od.B5%.1ml.A.001.rst [Editing in Progress]  
 Inst Method : C:\TOTALCHROM DATA\Methods\B5%-1mL-40min from C:\TOTALCHROM DATA\Results\Maria\gamma AA\mm382p od.B5%.1ml.A.001.raw  
 Proc Method : C:\TOTALCHROM DATA\Methods\B5%-1mL-40min from C:\TOTALCHROM DATA\Results\Maria\gamma AA\mm382p od.B5%.1ml.A.001.rst [Editing in Progress]  
 Calib Method : C:\TOTALCHROM DATA\Methods\B5%-1mL-40min from C:\TOTALCHROM DATA\Results\Maria\gamma AA\mm382p od.B5%.1ml.A.001.rst [Editing in Progress]  
 Report Format File: C:\PenExe\ToWS\Ver6.3.1\Config\User\manager\Default.rpt  
 Sequence File : C:\TOTALCHROM DATA\Sequences\bianco220d.B5%.1ml...seq

## DEFAULT REPORT

| Peak # | Component Name | Time [min] | Area [uV*sec] | Height [uV] | Area [%] | Norm. Area [%] | Cal. Range | Volt Range | BL  | Raw Amount | Adjusted Amount |
|--------|----------------|------------|---------------|-------------|----------|----------------|------------|------------|-----|------------|-----------------|
| 1      |                | 19.160     | 40669732.48   | 669668.25   | 94.53    | 94.53          |            |            | *MM | 40.0697    | 40.0697         |
| 2      |                | 24.552     | 2352787.04    | 38294.10    | 5.47     | 5.47           |            |            | *MM | 2.3528     | 2.3528          |
|        |                |            | 43022519.52   | 707962.35   | 100.00   | 100.00         |            |            |     | 43.0225    | 43.0225         |

Sample Name : mm382p      Sample # :      Page 1 of 1  
 File Name : C:\TOTALCHROM DATA\Results\Maria\gamma AA\mm382p od.B5%.1ml.A.001.raw  
 Date : 22/07/2013 16:33:04  
 Method :      Time of Injection: 22/07/2013 14:04:27  
 Start Time : 16.21 min      End Time : 31.56 min      Low Point : -25.63 mAU      High Point : 664.69 mAU  
 PHS Offset : -26.63 mAU      PHS Bias : 711.3 mAU

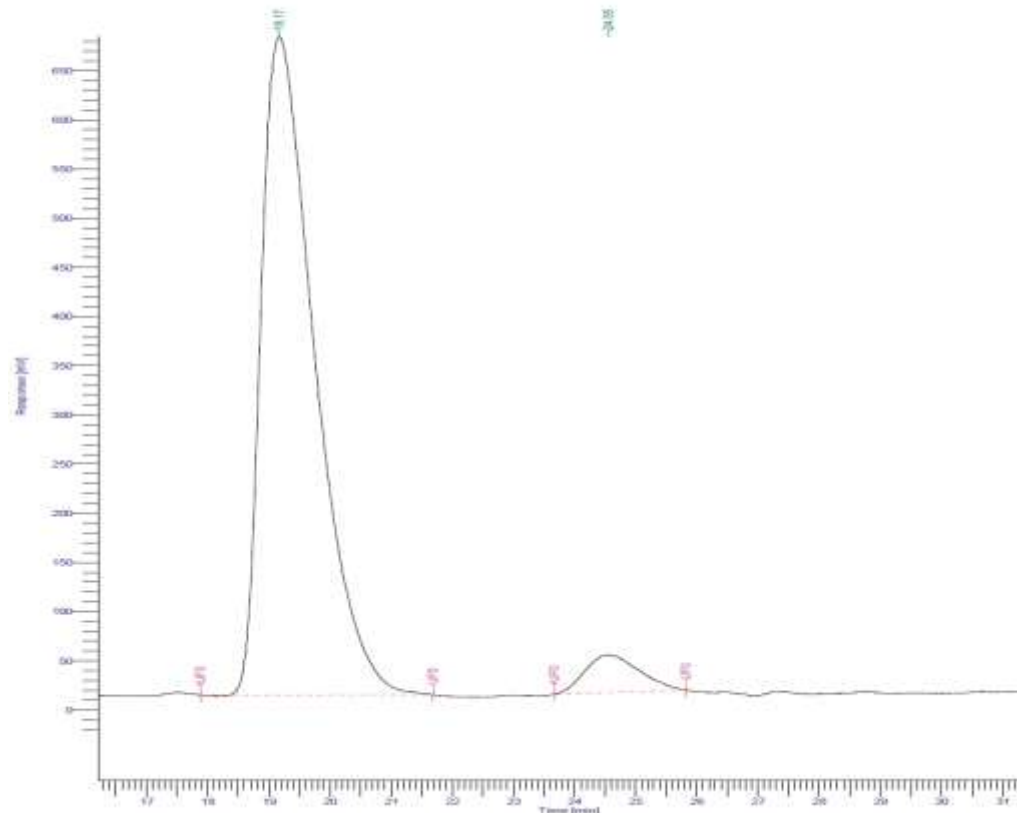

## Compound 9e

Software Version : 6.3.1.0504 Date : 26/04/2013 12:26:56  
 Operator : manager Sample Name : AA17racemo  
 Sample Number : AutoSampler : SER200 Study :  
 Instrument Name : PerkinElmer LC Rack/Vial : 0/1  
 Instrument Serial # : None Channel : A  
 Delay Time : 0.00 min A/D mV Range : 1000  
 Sampling Rate : 2.2727 pts/s End Time : 45.00 min  
 Sample Volume : 1.000000 µl  
 Sample Amount : 1.0000 Area Reject : 0.000000  
 Data Acquisition Time : 14/03/2013 10:31:08 Dilution Factor : 1.00  
 Cycle : 1

Raw Data File : C:\TOTALCHROM DATA\Results\MariaIgamma AAAA17racemo.ad.B2% 0.75mL.A.001.raw  
 Result File : C:\TOTALCHROM DATA\Results\MariaIgamma AAAA17racemo.ad.B2% 0.75mL.A.001.rst [Editing in Progress]  
 Inst Method : C:\TOTALCHROM DATA\Methods\B2%-0.75mL-45min from C:\TOTALCHROM DATA\Results\MariaIgamma  
 AAAA17racemo.ad.B2% 0.75mL.A.001.raw  
 Proc Method : C:\TOTALCHROM DATA\Methods\B2%-0.75mL-45min from C:\TOTALCHROM DATA\Results\MariaIgamma  
 AAAA17racemo.ad.B2% 0.75mL.A.001.rst [Editing in Progress]  
 Calib Method : C:\TOTALCHROM DATA\Methods\B2%-0.75mL-45min from C:\TOTALCHROM DATA\Results\MariaIgamma  
 AAAA17racemo.ad.B2% 0.75mL.A.001.rst [Editing in Progress]  
 Report Format File : C:\PenExe\Tc\WS\Ver6.3.1\Config\Usermanager\Default.rpt  
 Sequence File : C:\TOTALCHROM DATA\Sequences\AA17racemo.ad.B2% 0.75mL.-.seq

## DEFAULT REPORT

| Peak # | Component Name | Time [min] | Area [µV*sec] | Height [µV] | Area [%] | Norm. Area [%] | Cal. Range | Volt Range | BL | Raw Amount | Adjusted Amount |
|--------|----------------|------------|---------------|-------------|----------|----------------|------------|------------|----|------------|-----------------|
| 1      |                | 23.401     | 17622960.83   | 468715.45   | 49.60    | 49.60          |            |            | MM | 17.6230    | 17.6230         |
| 2      |                | 29.443     | 17909679.68   | 359208.88   | 50.40    | 50.40          |            |            | MM | 17.9097    | 17.9097         |
|        |                |            | 35532639.50   | 827924.33   | 100.00   | 100.00         |            |            |    | 35.5326    | 35.5326         |

Sample Name : AA17racemo Sample # : Page 1 of 1  
 FileName : C:\TOTALCHROM DATA\Results\MariaIgamma AAAA17racemo.ad.B2% 0.75mL.A.001.raw  
 Date : 26/04/2013 12:27:53  
 Method : Time of Injection : 14/03/2013 10:31:08  
 Start Time : 30.00 min End Time : 34.00 min Low Point : -11.74 mAU High Point : 496.06 mAU  
 Plot Offset : -11.74 mAU Plot Scale : 500.0 mAU

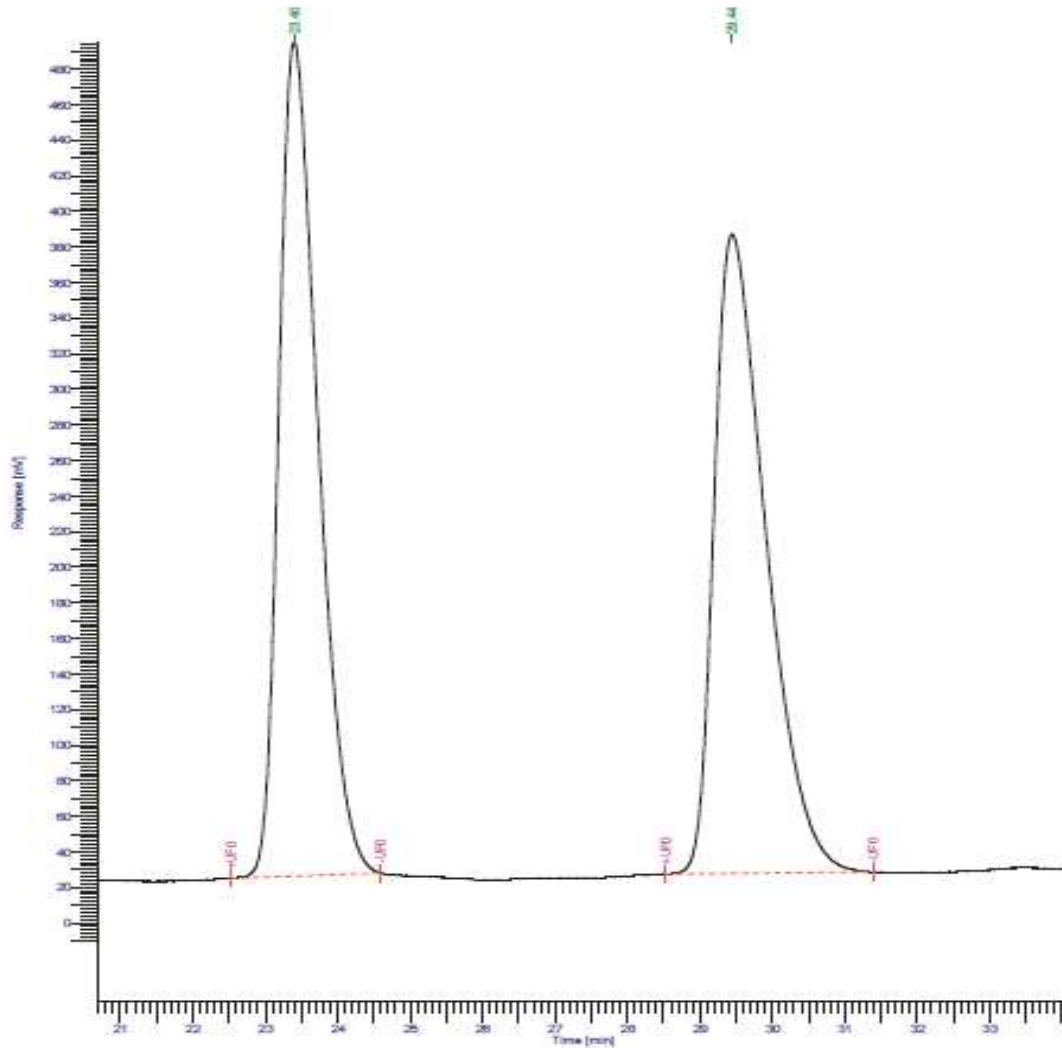

|                       |                       |                 |                       |
|-----------------------|-----------------------|-----------------|-----------------------|
| Software Version      | : 6.3.1.0504          | Date            | : 26/04/2013 16:17:29 |
| Operator              | : manager             | Sample Name     | : mm361phex           |
| Sample Number         | :                     | Study           | :                     |
| AutoSampler           | : SER200              | Rack/Vial       | : 0/0                 |
| Instrument Name       | : PerkinElmer LC      | Channel         | : 8                   |
| Instrument Serial #   | : None                | A/D mV Range    | : 1000                |
| Delay Time            | : 0.00 min            | End Time        | : 31.34 min           |
| Sampling Rate         | : 2.2737 pts/s        | Area Reject     | : 0.000000            |
| Sample Volume         | : 1.000000 ul         | Dilution Factor | : 1.00                |
| Sample Amount         | : 1.0000              | Cycle           | : 1                   |
| Data Acquisition Time | : 26/04/2013 15:44:33 |                 |                       |

Raw Data File : c:\totalchrom\data/results\maria\gamma aa\mm361phexch.ad.b2%.0.75ml.b.001.raw <Incomplete>  
 Inst Method : C:\TOTALCHROM\DATA\Methods\B2%-0.75mL-40min from c:\totalchrom\data/results\maria\gamma aa\mm361phexch.ad.b2%.0.75ml.b.001.raw  
 Proc Method : C:\TOTALCHROM\DATA\Methods\B2%-0.75mL-40min.mth from  
 Calib Method : C:\TOTALCHROM\DATA\Methods\B2%-0.75mL-40min.mth from  
 Report Format File : C:\PerkinElmer\TCW\31\Ver5.3.1\Config\User\manager\Default.rpt  
 Sequence File : C:\TOTALCHROM\DATA\Sequences\mm361phexch.ad.B2%.0.75ml.-.seq

## DEFAULT REPORT

| Peak # | Component Name | Time [min] | Area [uV*sec] | Height [uV] | Area [%] | Norm. Area [%] | Cal. Range | Volt Range | BL  | Raw Amount | Adjusted Amount |
|--------|----------------|------------|---------------|-------------|----------|----------------|------------|------------|-----|------------|-----------------|
| 1      |                | 21.362     | 6942157.78    | 207445.23   | 94.08    | 94.08          |            |            | *MM | 6.9422     | 6.9422          |
| 2      |                | 27.221     | 436487.89     | 10585.65    | 5.92     | 5.92           |            |            | *MM | 0.4365     | 0.4365          |
|        |                |            | 7378645.67    | 218030.89   | 100.00   | 100.00         |            |            |     | 7.3786     | 7.3786          |

Major Component Report

|                                                                                                        |                                         |                         |
|--------------------------------------------------------------------------------------------------------|-----------------------------------------|-------------------------|
| Sample Name : mm361phex                                                                                | Sample # :                              | Page 1 of 1             |
| File Name : c:\totalchrom\data/results\maria\gamma aa\mm361phexch.ad.b2%.0.75ml.b.001.raw <Incomplete> |                                         |                         |
| Date : 26/04/2013 16:17:59                                                                             |                                         |                         |
| Method : B2%-0.75mL-40min.mth                                                                          | Time of Injection : 26/04/2013 15:44:33 |                         |
| Start Time : 19.79 min                                                                                 | End Time : 31.04 min                    | Low Point : -1.56 mAU   |
| Plot Offset : -1.56 mAU                                                                                | Plot Scale : 218.0 mAU                  | High Point : 217.23 mAU |

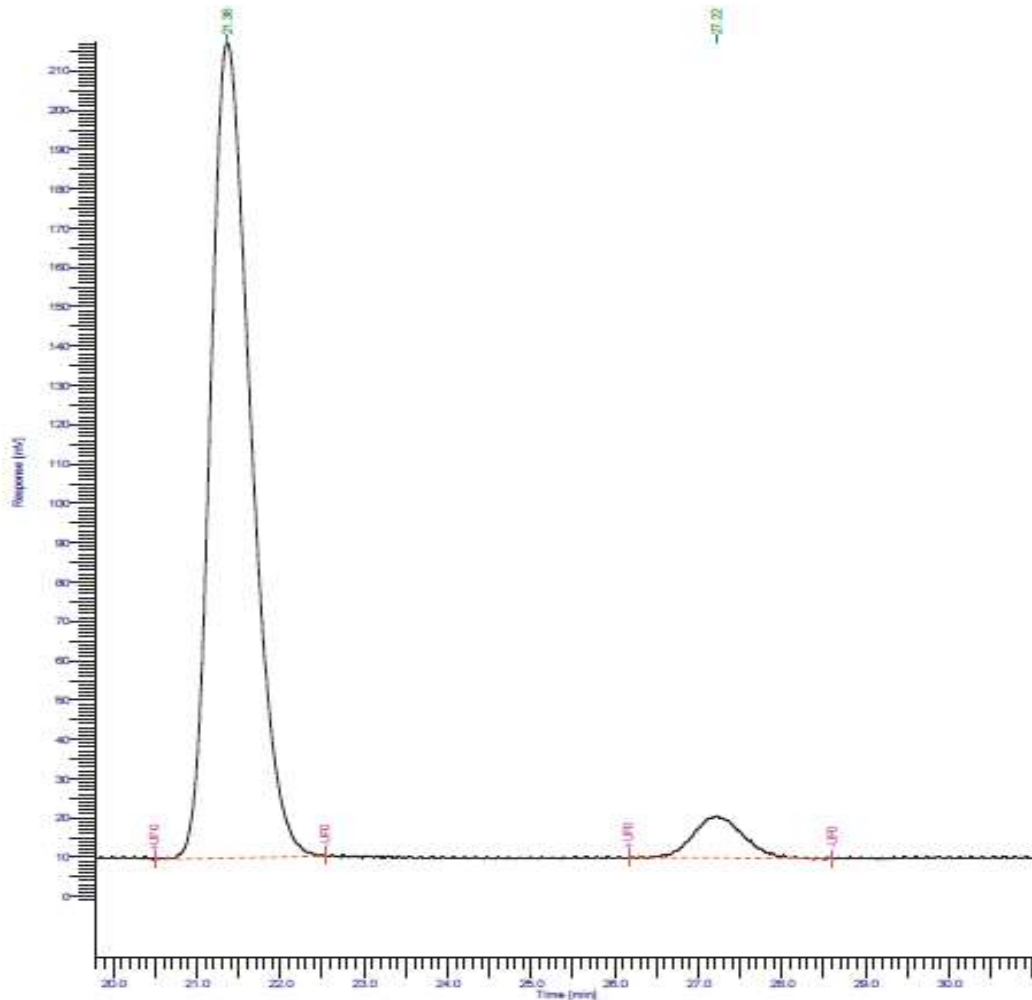

## Compound 9f

Raw Data File : c:\totalchrom data\results\maria\gamma aa\mmhepracemo (dalet93).ad.B2%. 0.75ml.a.001.raw ~Incomplete  
 Inst Method : C:\TOTALCHROM DATA\Methods\B10%-1mL-45min from c:\totalchrom data\results\maria\gamma aa\mmhepracemo (dalet93).ad.b2%.ml.a.001.raw  
 Proc Method : C:\TOTALCHROM DATA\Methods\B2%-0.75mL-45min.mth from  
 Calib Method : C:\TOTALCHROM DATA\Methods\B2%-0.75mL-45min.mth from  
 Report Format File: C:\PenExe\Tc\WS\Ver6.3.1\Config\User\manager\Default.rpt  
 Sequence File : C:\TOTALCHROM DATA\Sequences\mmhepracemo (dalet93).ad.B2%. 0.75 ml.-.seq

### DEFAULT REPORT

| Peak # | Component Name | Time [min] | Area [uV*sec] | Height [uV] | Area [%] | Norm. Area [%] | Cal. Range | Volt Range | BL  | Raw Amount | Adjusted Amount |
|--------|----------------|------------|---------------|-------------|----------|----------------|------------|------------|-----|------------|-----------------|
| 1      |                | 22.694     | 6632258.26    | 109851.95   | 50.07    | 50.07          |            |            | *MM | 6.6334     | 6.6334          |
| 2      |                | 27.239     | 6623439.74    | 88900.08    | 49.93    | 49.93          |            |            | *MM | 6.6232     | 6.6232          |
|        |                |            | 13255698.00   | 198752.03   | 100.00   | 100.00         |            |            |     | 13.2557    | 13.2557         |

Missing Component Report  
 Component Expected Retention (Calibration File)

All components were found

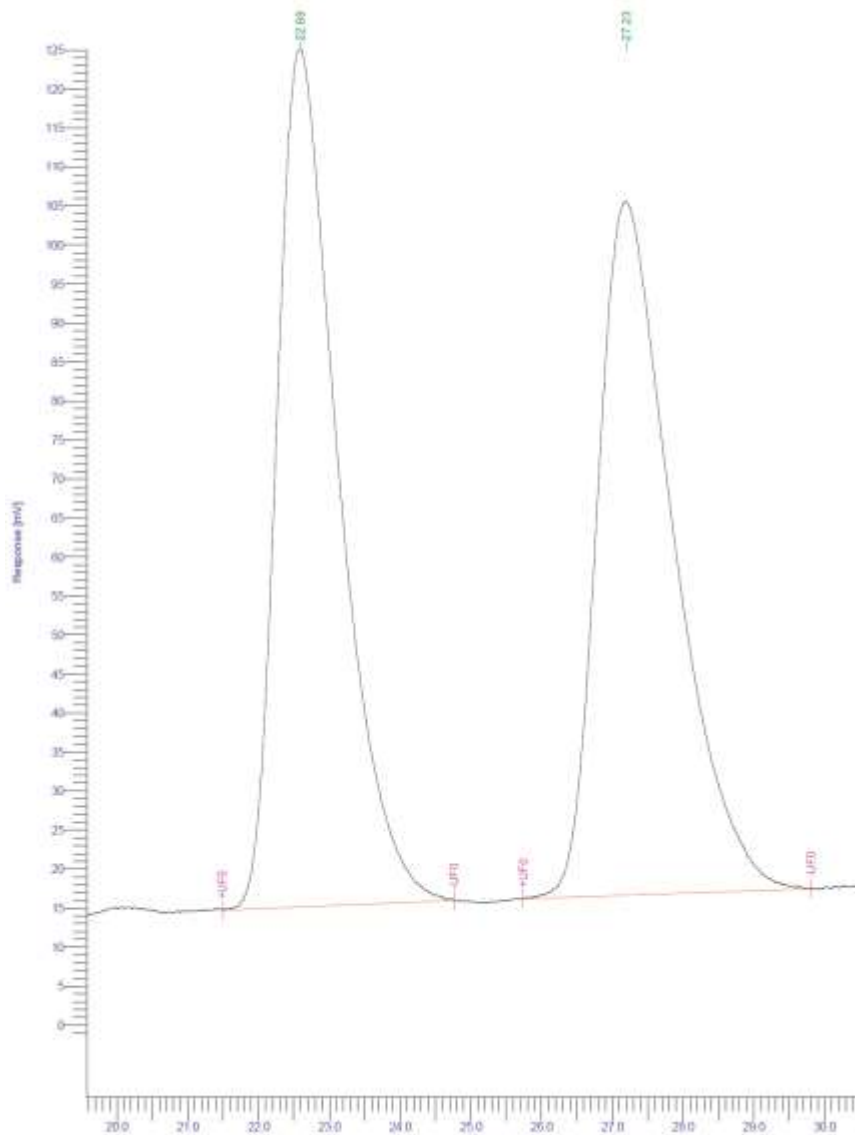

```

Software Version : 6.3.1.0504
Operator : manager
Sample Number :
AutoSampler : SER200
Instrument Name : PerkinElmer LC
Instrument Serial # : None
Delay Time : 0.00 min
Sampling Rate : 2.2727 pts/s
Sample Volume : 1.000000 ul
Sample Amount : 1.0000
Data Acquisition Time : 14/03/2013 12:12:54

Date : 29/05/2013 15:05:25
Sample Name : AA14heptchiral
Study :
Rack/Vial : 0/1
Channel : A
A/D mV Range : 1000
End Time : 50.00 min

Area Reject : 0.000000
Dilution Factor : 1.00
Cycle : 1

```

```

Raw Data File : C:\TOTALCHROM DATA\Results\Marielgamma AA\AA14chiralhept.ad.B2%.0.75ml.A.001.raw
Result File : C:\TOTALCHROM DATA\Results\Marielgamma AA\AA14chiralhept.ad.B2%.0.75ml.A.001.rst [Editing In Progress]
Inst Method : C:\TOTALCHROM DATA\Methods\B2%-0.75mL-50min from C:\TOTALCHROM DATA\Results\Marielgamma
AA\AA14chiralhept.ad.B2%.0.75ml.A.001.raw
Proc Method : C:\TOTALCHROM DATA\Methods\B2%-0.75mL-50min from C:\TOTALCHROM DATA\Results\Marielgamma
AA\AA14chiralhept.ad.B2%.0.75ml.A.001.rst [Editing In Progress]
Calib Method : C:\TOTALCHROM DATA\Methods\B2%-0.75mL-50min from C:\TOTALCHROM DATA\Results\Marielgamma
AA\AA14chiralhept.ad.B2%.0.75ml.A.001.rst [Editing In Progress]
Report Format File : C:\PeriExec\Tc\W\SI\Ver6.3.1\Config\User\manager\Default.rpt
Sequence File : C:\TOTALCHROM DATA\Sequences\AA14chiralhept.ad.B2%.0.75ml.r.seq

```

## DEFAULT REPORT

| Peak # | Component Name | Time [min] | Area [uV*sec] | Height [uV] | Area [%] | Norm. Area [%] | Cal. Range | Volt Range | BL  | Raw Amount | Adjusted Amount |
|--------|----------------|------------|---------------|-------------|----------|----------------|------------|------------|-----|------------|-----------------|
| 1      |                | 22.963     | 17251136.75   | 466574.59   | 93.15    | 93.15          |            |            | *MM | 17.2511    | 17.2511         |
| 2      |                | 26.092     | 1268483.08    | 31827.25    | 6.85     | 6.85           |            |            | *MM | 1.2685     | 1.2685          |
|        |                |            | 18519619.83   | 498401.84   | 100.00   | 100.00         |            |            |     | 18.5196    | 18.5196         |

Sample Name : AA14heptchiral      Sample # :      Page 1 of 1  
 File Name : C:\TOTALCHROM DATA\Results\Marielgamma AA\AA14chiralhept.ad.B2%.0.75ml.A.001.raw  
 Date : 29/05/2013 15:06:10  
 Method :      Time of Injection : 14/03/2013 12:12:54  
 Start Time : 19.00 min      End Time : 30.19 min      Low Point : -19.07 mAU      High Point : 477.94 mAU  
 Plot Offset : -19.07 mAU      Plot Scale : 497.0 mAU

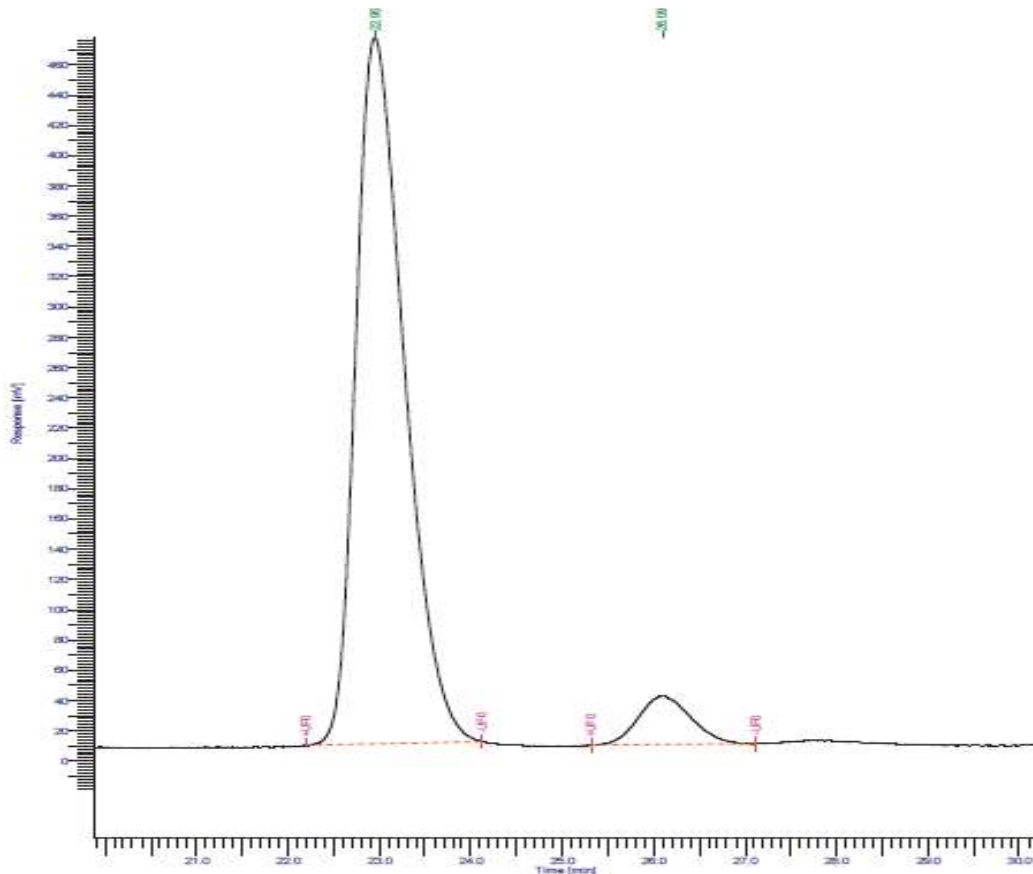



## Compound 9g

|                                             |                            |
|---------------------------------------------|----------------------------|
| Software Version : 6.3.1.0504               | Date : 12/06/2013 18:17:05 |
| Operator : manager                          | Sample Name : Octanal      |
| Sample Number :                             | Study :                    |
| AutoSampler : GER200                        | Rack/Vial : 0/1            |
| Instrument Name : PerkinElmer LC            | Channel : A                |
| Instrument Serial # : None                  | A/D mV Range : 1000        |
| Delay Time : 0.00 min                       | End Time : 40.00 min       |
| Sampling Rate : 2.2727 pts/s                |                            |
| Sample Volume : 1.000000 ul                 | Area Reject : 0.000000     |
| Sample Amount : 1.0000                      | Dilution Factor : 1.00     |
| Data Acquisition Time : 12/06/2013 17:30:44 | Cycle : 1                  |

Raw Data File : C:\TOTALCHROM DATA\Results\Marialgamma\_AA\loctanalracemicmm.ad.B1%.0.75ml.A.001.raw  
 Inst Method : C:\TOTALCHROM DATA\Methods\B1%-0.75mL-40min from C:\TOTALCHROM DATA\Results\Marialgamma\_AA\loctanalracemicmm.ad.B1%.0.75ml.A.001.raw  
 Proc Method : C:\TOTALCHROM DATA\Methods\B1%-0.75mL-40min.mth from  
 Calib Method : C:\TOTALCHROM DATA\Methods\B1%-0.75mL-40min.mth from  
 Report Format File : C:\PenExe\TCW\Ver5.3.1\Config\User\manager\Default.rpt  
 Sequence File : C:\TOTALCHROM DATA\Sequences\loctanalracemicmm.ad.B1%.0.75ml.-.seq

## DEFAULT REPORT

| Peak # | Component Name | Time [min] | Area [uV*sec] | Height [uV] | Area [%] | Norm. Area [%] | Cal. Range | Volt Range | BL  | Raw Amount | Adjusted Amount |
|--------|----------------|------------|---------------|-------------|----------|----------------|------------|------------|-----|------------|-----------------|
| 1      |                | 24.339     | 8216134.44    | 211074.47   | 50.39    | 50.39          |            |            | *MM | 8.2161     | 8.2161          |
| 2      |                | 26.019     | 8089013.65    | 174653.34   | 49.61    | 49.61          |            |            | *MM | 8.0890     | 8.0890          |
|        |                |            | 16305148.09   | 385727.80   | 100.00   | 100.00         |            |            |     | 16.3051    | 16.3051         |

Sample Name : Octanal      Sample # :      Page 1 of 1  
 File Name : C:\TOTALCHROM DATA\Results\Marialgamma\_AA\loctanalracemicmm.ad.B1%.0.75ml.A.001.raw  
 Date : 12/06/2013 18:17:05  
 Method : B1%-0.75mL-40min.mth      Time of Injection : 12/06/2013 17:30:44  
 Start Time : 23.00 min      End Time : 30.70 min      Low Point : -17.67 mAU      High Point : 207.80 mAU  
 Plot Offset : -17.67 mAU      Plot Scale : 226.5 mAU

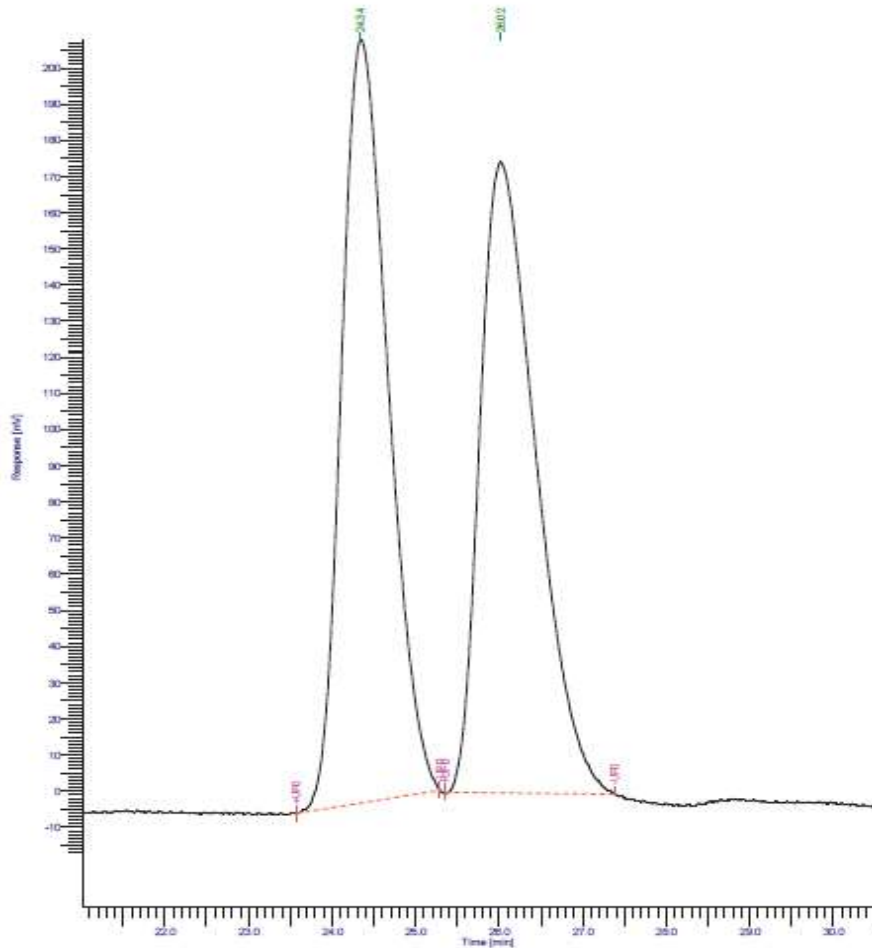

```

Software Version : 6.3.1.0504
Operator : manager
Sample Number :
AutoSampler : SER200
Instrument Name : PerkinElmer LC
Instrument Serial #: None
Delay Time : 0.00 min
Sampling Rate : 2.2727 pts/s
Sample Volume : 1.00000 ul
Sample Amount : 1.0000
Data Acquisition Time : 12/06/2013 18:17:19
Date : 13/06/2013 09:13:45
Sample Name : Chiral Octanal
Study :
Rack/Vial : 0/1
Channel : A
A/D mV Range : 1000
End Time : 29.99 min
Area Reject : 0.000000
Dilution Factor : 1.00
Cycle : 1

```

```

Raw Data File : C:\TOTALCHROM DATA\Results\Mariagamma AA\chiral octanal44.ad.B1%.0.75mL.A.001.raw
Result File : C:\TOTALCHROM DATA\Results\Mariagamma AA\chiral octanal44.ad.B1%.0.75mL.A.001.rst [Editing in Progress]
Inst Method : C:\TOTALCHROM DATA\Methods\B1%-0.75mL-30min from C:\TOTALCHROM DATA\Results\Mariagamma AA\chiral octanal44.ad.B1%.0.75mL.A.001.raw
Proc Method : C:\TOTALCHROM DATA\Methods\B1%-0.75mL-30min from C:\TOTALCHROM DATA\Results\Mariagamma AA\chiral octanal44.ad.B1%.0.75mL.A.001.rst [Editing in Progress]
Calib Method : C:\TOTALCHROM DATA\Methods\B1%-0.75mL-30min from C:\TOTALCHROM DATA\Results\Mariagamma AA\chiral octanal44.ad.B1%.0.75mL.A.001.rst [Editing in Progress]
Report Format File : C:\PenExe\TCW\Ver6.3.1\Config\user\manager\Default.rpt
Sequence File : C:\TOTALCHROM DATA\Sequences\chiral octanal44.ad.B1%.0.75mL--.seq

```

## DEFAULT REPORT

| Peak # | Component Name | Time [min] | Area [uV*sec] | Height [uV] | Area [%] | Norm. Area [%] | Cal. Range | Volt Range | BL  | Raw Amount | Adjusted Amount |
|--------|----------------|------------|---------------|-------------|----------|----------------|------------|------------|-----|------------|-----------------|
| 1      |                | 24.413     | 13109186.34   | 308553.25   | 91.50    | 91.50          |            |            | *MM | 13.1092    | 13.1092         |
| 2      |                | 26.451     | 1218346.32    | 29562.20    | 8.50     | 8.50           |            |            | *MM | 1.2183     | 1.2183          |
|        |                |            | 14327532.65   | 338115.46   | 100.00   | 100.00         |            |            |     | 14.3275    | 14.3275         |

```

Sample Name : 1844OCTAO:
Sample # :
Page 1 of 1
Filename : C:\TOTALCHROM DATA\Results\chiral\1844OCTAO\1844OCTAO.ad.B1%.0.75mL.A.001.raw
Date : 29/06/2013 12:40:13
Method :
Time of Injection : 09/06/2013 12:41:46
Start Time : 28.90 min
End Time : 42.20 min
Low Point : -3.19 mAU
High Point : 273.02 mAU
Plot Offset : -3.19 mAU
Plot Scale : 277.1 mAU

```

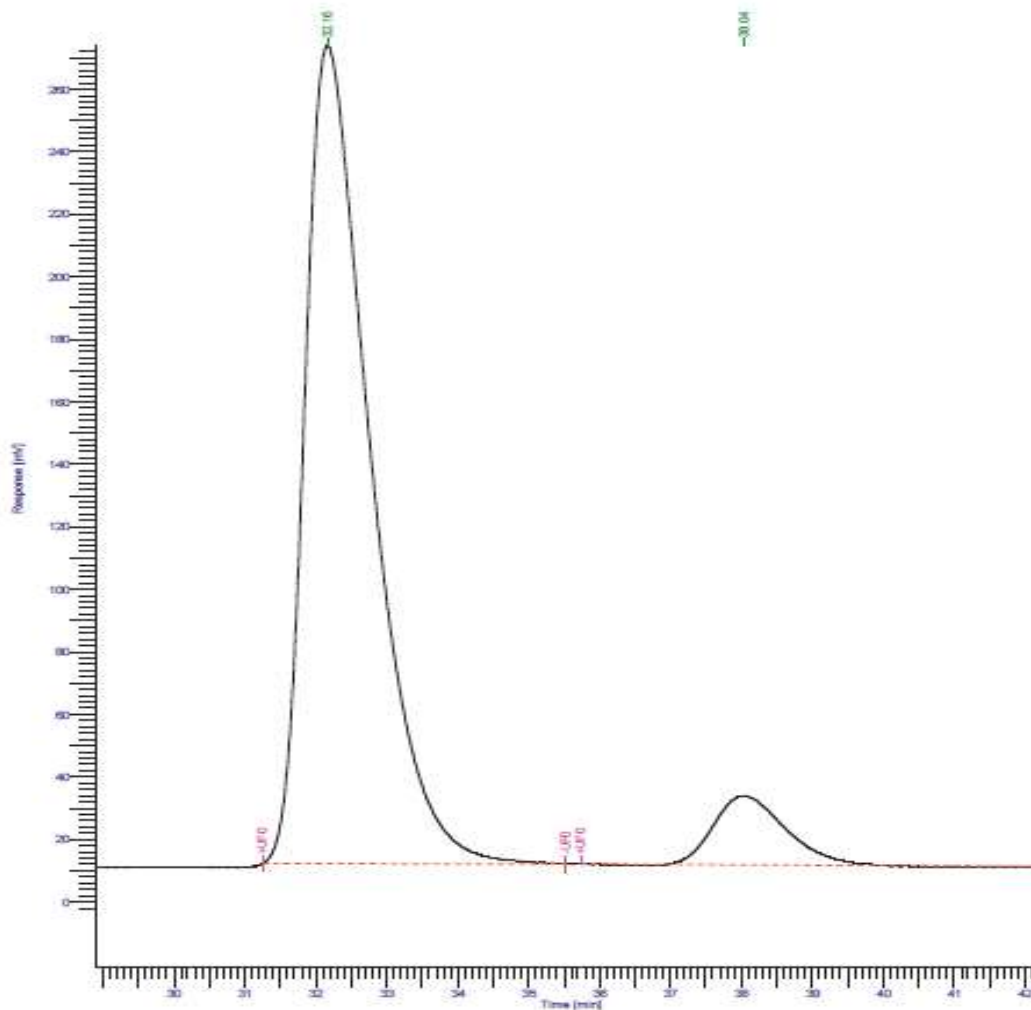

## Compound 9h

```

Software Version  : 6.3.1.0504
Operator          : manager
Sample Number    :
Autosampler      : SER200
Instrument Name   : PerkinElmer LC
Instrument Serial #:
Delay Time       : 0.00 min
Sampling Rate    : 2.2727 pts/s
Sample Volume    : 1.000000 ul
Sample Amount    : 1.0000
Data Acquisition Time : 13/06/2013 11:23:23

Date             : 13/06/2013 12:07:20
Sample Name      : Nonanalaracemic
Study            :
Rack/Vial        : 0/1
Channel          : A
A/D mV Range     : 1000
End Time         : 40.00 min

Area Reject      : 0.000000
Dilution Factor  : 1.00
Cycle            : 1

Raw Data File : C:\TOTALCHROM DATA\Results\Mariagamma AA\Nonanalaracemicmod.B5%.0.75mLA.001.raw
Result File   : C:\TOTALCHROM DATA\Results\Mariagamma AA\Nonanalaracemicmod.B5%.0.75mLA.001.rst [Editing in Progress]
Inst Method   : C:\TOTALCHROM DATA\Methods\B5%-0.75mL-40min from C:\TOTALCHROM DATA\Results\Mariagamma
AA\Nonanalaracemicmod.B5%.0.75mLA.001.raw
Proc Method   : C:\TOTALCHROM DATA\Methods\B5%-0.75mL-40min from C:\TOTALCHROM DATA\Results\Mariagamma
AA\Nonanalaracemicmod.B5%.0.75mLA.001.rst [Editing in Progress]
Calib Method  : C:\TOTALCHROM DATA\Methods\B5%-0.75mL-40min from C:\TOTALCHROM DATA\Results\Mariagamma
AA\Nonanalaracemicmod.B5%.0.75mLA.001.rst [Editing in Progress]
Report Format File : C:\PenExcel\TWSI\Vers.3.11\Config\User\manager\Default.rpt
Sequence File  : C:\TOTALCHROM DATA\Sequences\Nonanalaracemicmod.B5%.0.75mL-...seq

```

## DEFAULT REPORT

| Peak # | Component Name | Time [min] | Area [uV*sec] | Height [uV] | Area [%] | Norm. Area [%] | Cal. Range | Volt Range | BL | Raw Amount | Adjusted Amount |
|--------|----------------|------------|---------------|-------------|----------|----------------|------------|------------|----|------------|-----------------|
| 1      |                | 25.388     | 3354148.95    | 49492.29    | 50.55    | 50.55          |            |            | MM | 3.3541     | 3.3541          |
| 2      |                | 32.237     | 3281323.32    | 37610.74    | 49.45    | 49.45          |            |            | MM | 3.2813     | 3.2813          |
|        |                |            | 6635472.27    | 87103.04    | 100.00   | 100.00         |            |            |    | 6.6355     | 6.6355          |

## Missing Component Report:

```

Sample Name: Nonanalaracemic
Sample #:
Page 1 of 1
FileName : C:\TOTALCHROM DATA\Results\Mariagamma AA\Nonanalaracemicmod.B5%.0.75mLA.001.raw
Date : 13/06/2013 12:07:20
Method :
Time of Injection: 13/06/2013 11:23:23
Start Time : 23:20 min End Time : 36:34 min Low Point : 9.09 mAU High Point : 96.34 mAU
Plot Offset: 9.09 mAU Plot Scale: 37.3 mAU

```

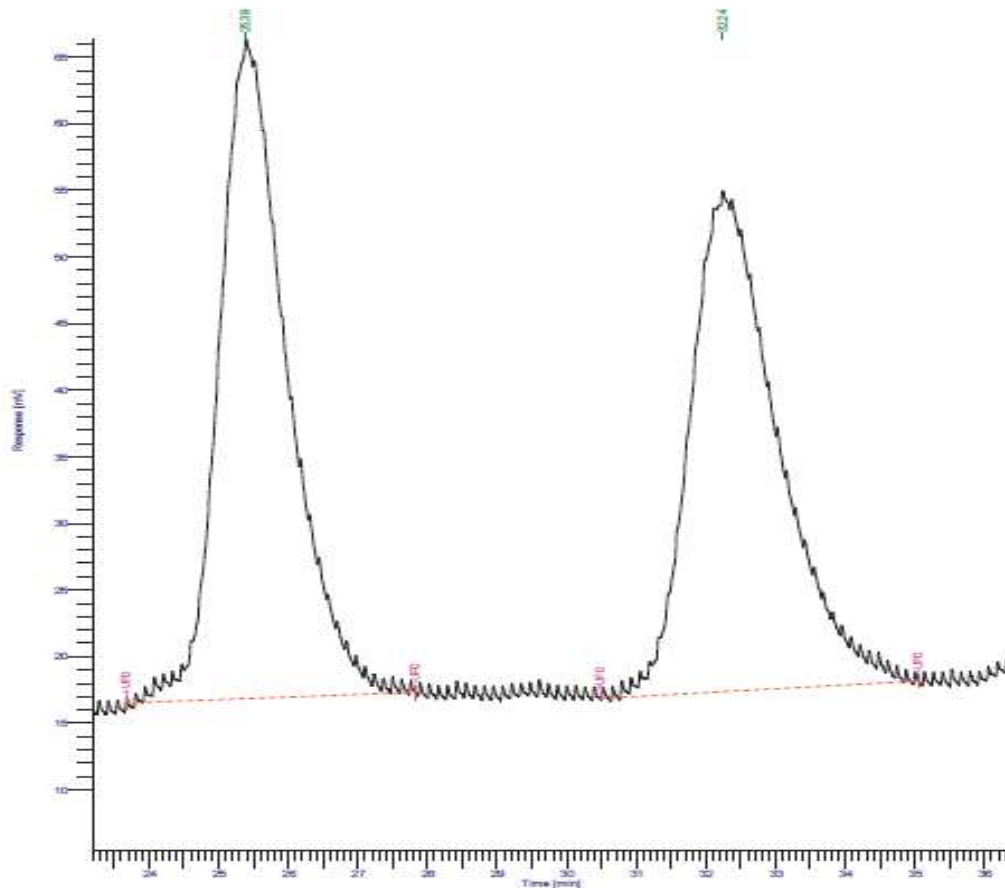

Software Version : 6.3.1.0504 Date : 13/06/2013 12:46:35  
 Operator : manager Sample Name : Nonanalchiral  
 Sample Number : : : : Study : : : :  
 Auto Sampler : SER200 Rack/Vial : 0/0  
 Instrument Name : PerkinElmer LC Channel : A  
 Instrument Serial # : None A/D mV Range : 1000  
 Delay Time : 0.00 min End Time : 37.17 min  
 Sampling Rate : 2.2727 pts/s  
 Sample Volume : 1.000000 ul  
 Sample Amount : 1.0000 Area Reject : 0.000000  
 Data Acquisition Time : 13/06/2013 12:07:38 Dilution Factor : 1.00  
 Cycle : 1

Raw Data File : c:\totalchrom\data\results\maria\gamma aa\nonanalchiral\mod.b5%.0.75ml.a.001.raw <incomplete>  
 Inst Method : C:\TOTALCHROM\DATA\Methods\B5%-0.75mL-40min from c:\totalchrom\data\results\maria\gamma aa\nonanalchiral\mod.b5%.0.75ml.a.001.raw  
 Proc Method : C:\TOTALCHROM\DATA\Methods\B5%-0.75mL-40min.mth from  
 Calib Method : C:\TOTALCHROM\DATA\Methods\B5%-0.75mL-40min.mth from  
 Report Format File : C:\PenExec\TcW\Ver6.3.1\Config\User\manager\Default.rpt  
 Sequence File : C:\TOTALCHROM\DATA\Sequences\NonanalRAcemic\mod.B5%.0.75ml.-.seq

## DEFAULT REPORT

| Peak # | Component Name | Time [min] | Area [uV*sec] | Height [uV] | Area [%] | Norm. Area [%] | Cal. Range | Volt Range | BL  | Raw Amount | Adjusted Amount |
|--------|----------------|------------|---------------|-------------|----------|----------------|------------|------------|-----|------------|-----------------|
| 1      |                | 25.381     | 21944271.67   | 296133.17   | 93.47    | 93.47          |            |            | *MM | 21.9443    | 21.9443         |
| 2      |                | 32.362     | 1533612.60    | 20115.08    | 6.53     | 6.53           |            |            | *MM | 1.5336     | 1.5336          |
|        |                |            | 23477884.28   | 316248.25   | 100.00   | 100.00         |            |            |     | 23.4779    | 23.4779         |

Missing Component Report  
 Component Expected Retention (Calibration File)

Sample Name : Nonanalchiral Sample # : Page 1 of 1  
 FileName : c:\totalchrom\data\results\maria\gamma aa\nonanalchiral\mod.b5%.0.75ml.a.001.raw <incomplete>  
 Date : 13/06/2013 12:47:09  
 Method : B5%-0.75mL-40min.mth Time of Injection : 13/06/2013 12:07:38  
 Start Time : 23.11 min End Time : 36.03 min Low Point : -7.42 mAU High Point : 305.97 mAU  
 Plot Offset : -7.42 mAU Plot Scale : 313.4 mAU

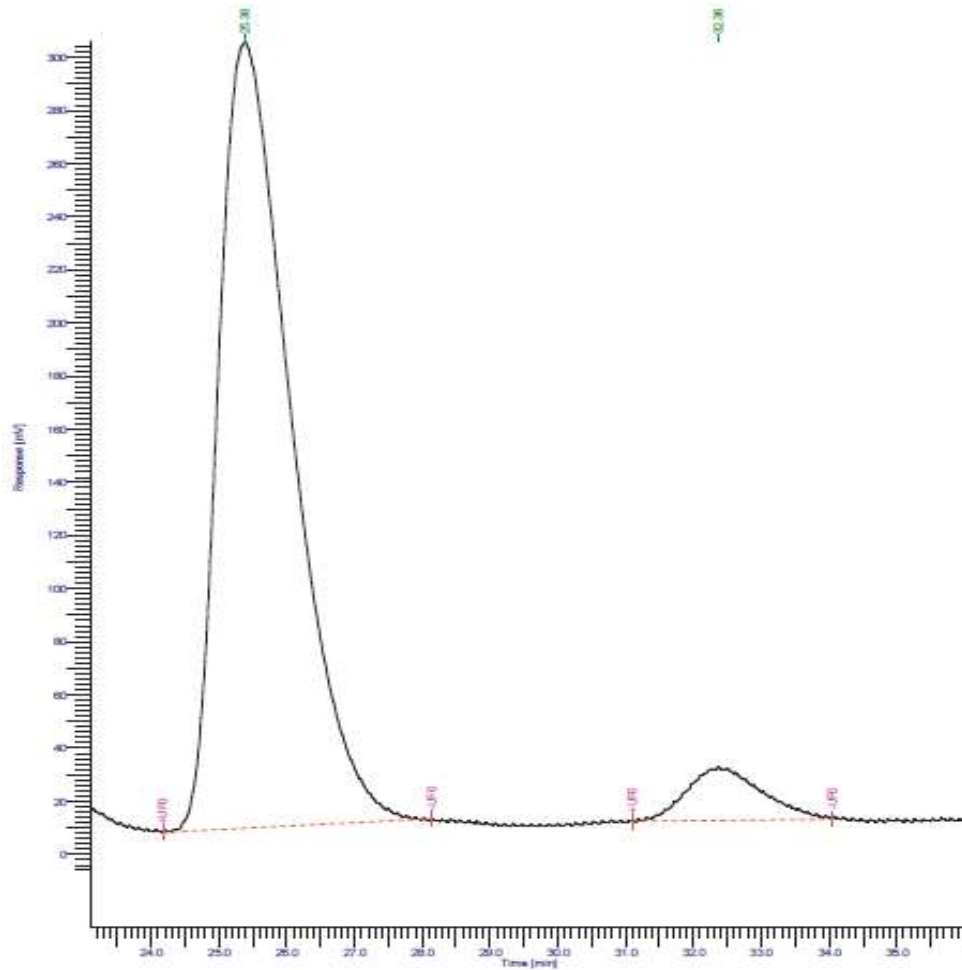

## Compound 9i

```

Software Version : 6.3.1.0504
Operator : manager
Sample Number :
Auto Sampler : SER200
Instrument Name : PerkinElmer LC
Instrument Serial #: None
Delay Time : 0.00 min
Sampling Rate : 2.2727 pts/s
Sample Volume : 1.000000 ul
Sample Amount : 1.0000
Data Acquisition Time : 07/03/2013 12:30:43
Date : 29/05/2013 14:41:10
Sample Name : AA18spracemo
Study :
Rack/Vial : 0/1
Channel : A
A/D mV Range : 1000
End Time : 40.00 min
Area Reject : 0.000000
Dilution Factor : 1.00
Cycle : 1
Raw Data File : C:\TOTALCHROM DATA\Results\MariaIgamma.AA\AA18spracemAA18p.ad.B2%.0.75mL.A.001.raw
Result File : C:\TOTALCHROM DATA\Results\MariaIgamma.AA\AA18spracemAA18p.ad.B2%.0.75mL.A.001.rst [Editing in Progress]
Inst Method : C:\TOTALCHROM DATA\Methods\B2%-0.75mL-40min from C:\TOTALCHROM DATA\Results\MariaIgamma.AA\AA18spracemAA18p.ad.B2%.0.75mL.A.001.raw
Proc Method : C:\TOTALCHROM DATA\Methods\B2%-0.75mL-40min from C:\TOTALCHROM DATA\Results\MariaIgamma.AA\AA18spracemAA18p.ad.B2%.0.75mL.A.001.rst [Editing in Progress]
Calib Method : C:\TOTALCHROM DATA\Methods\B2%-0.75mL-40min from C:\TOTALCHROM DATA\Results\MariaIgamma.AA\AA18spracemAA18p.ad.B2%.0.75mL.A.001.rst [Editing in Progress]
Report Format File : C:\PenExec\TcW\SW\Ver6.3.1\Config\User\manager\Default.rpt
Sequence File : C:\TOTALCHROM DATA\Sequences\AA18spracemAA18p.ad.B2%.0.75mL.-.seq

```

## DEFAULT REPORT

| Peak # | Component Name | Time [min] | Area [uV*sec] | Height [uV] | Area [%] | Norm. Area [%] | Cal. Range | Volt Range | BL | Raw Amount | Adjusted Amount |
|--------|----------------|------------|---------------|-------------|----------|----------------|------------|------------|----|------------|-----------------|
| 1      |                | 23.672     | 21620054.40   | 570272.39   | 49.64    | 49.64          |            |            | MM | 21.6201    | 21.6201         |
| 2      |                | 30.969     | 21935519.94   | 394158.59   | 50.36    | 50.36          |            |            | MM | 21.9355    | 21.9355         |
|        |                |            | 43555574.34   | 964430.98   | 100.00   | 100.00         |            |            |    | 43.5556    | 43.5556         |

Sample Name : AA18spracemo      Sample #:      Page 1 of 1  
File Name : C:\TOTALCHROM DATA\Results\MariaIgamma.AA\AA18spracemAA18p.ad.B2%.0.75mL.A.001.raw  
Date : 29/05/2013 14:41:37  
Method :      Time of Injection: 07/03/2013 12:30:43  
Start Time : 22.07 min      End Time : 34.56 min      Low Point : -20.72 mAU      High Point : 585.50 mAU  
Plot Offset: -20.72 mAU      Plot Scale: 606.2 mAU

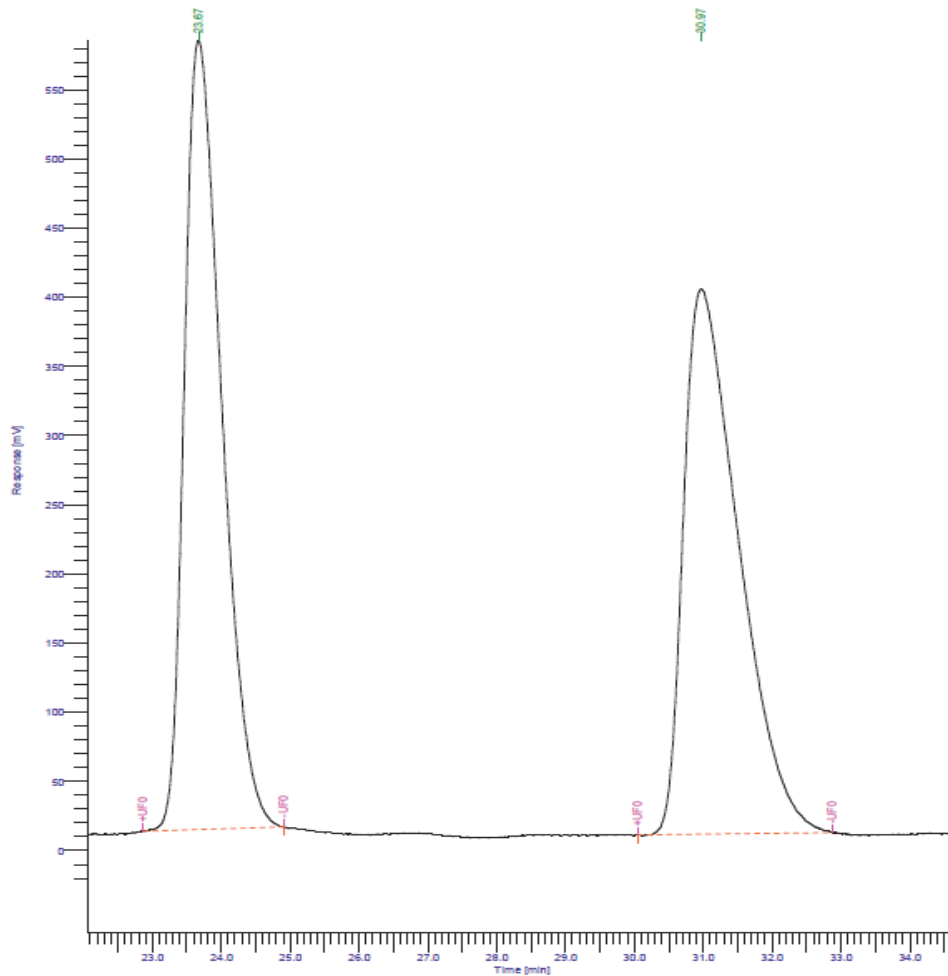

Software Version : 6.3.1.0504 Date : 29/05/2013 14:49:31  
 Operator : manager Sample Name : chiral AA15  
 Sample Number : SER200 Study :  
 AutoSampler : SER200 Rack/Vial : 0/1  
 Instrument Name : PerkinElmer LC Channel : A  
 Instrument Serial # : None A/D m/V Range : 1000  
 Delay Time : 0.00 min End Time : 40.00 min  
 Sampling Rate : 2.2727 pts/s  
 Sample Volume : 1.00000 ul  
 Sample Amount : 1.0000 Area Reject : 0.000000  
 Data Acquisition Time : 14/03/2013 15:40:05 Dilution Factor : 1.00  
 Cycle : 1

Raw Data File : C:\TOTALCHROM DATA\Results\MariGamma AA\ChiralAA15.od.B5%.0.75mL.A.001.raw  
 Result File : C:\TOTALCHROM DATA\Results\MariGamma AA\ChiralAA15.od.B5%.0.75mL.A.001.rst [Editing in Progress]  
 Inst Method : C:\TOTALCHROM DATA\Methods\B5%-0.75mL-40min from C:\TOTALCHROM DATA\Results\MariGamma  
 AA\ChiralAA15.od.B5%.0.75mL.A.001.raw  
 Proc Method : C:\TOTALCHROM DATA\Methods\B5%-0.75mL-40min from C:\TOTALCHROM DATA\Results\MariGamma  
 AA\ChiralAA15.od.B5%.0.75mL.A.001.rst [Editing in Progress]  
 Calib Method : C:\TOTALCHROM DATA\Methods\B5%-0.75mL-40min from C:\TOTALCHROM DATA\Results\MariGamma  
 AA\ChiralAA15.od.B5%.0.75mL.A.001.rst [Editing in Progress]  
 Report Format File : C:\PerExec\Tc\WG\Ver6.3.1\Config\User\manager\Default.rpt  
 Sequence File : C:\TOTALCHROM DATA\Sequences\RacemicAA15.od.B5%.0.75mL.-.seq

## DEFAULT REPORT

| Peak # | Component Name | Time [min] | Area [uV*sec] | Height [uV] | Area [%] | Norm. Area [%] | Cal. Range | Volt Range | BL  | Raw Amount | Adjusted Amount |
|--------|----------------|------------|---------------|-------------|----------|----------------|------------|------------|-----|------------|-----------------|
| 1      |                | 22.770     | 49759656.02   | 687281.34   | 92.50    | 92.50          |            |            | *MM | 49.7597    | 49.7597         |
| 2      |                | 29.091     | 4037363.70    | 53631.67    | 7.50     | 7.50           |            |            | *MM | 4.0374     | 4.0374          |
|        |                |            | 53797019.72   | 740913.01   | 100.00   | 100.00         |            |            |     | 53.7970    | 53.7970         |

Sample Name : chiral AA15 Sample # : Page 1 of 1  
 File Name : C:\TOTALCHROM DATA\Results\MariGamma AA\ChiralAA15.od.B5%.0.75mL.A.001.raw  
 Date : 29/05/2013 14:50:01 Time of Injection : 14/03/2013 15:40:06  
 Method : Start Time : 23:06 min End Time : 33:05 min Low Point : -26.70 mAU High Point : 709.86 mAU  
 Plot Offset : -26.70 mAU Plot Scale : 709.6 mAU

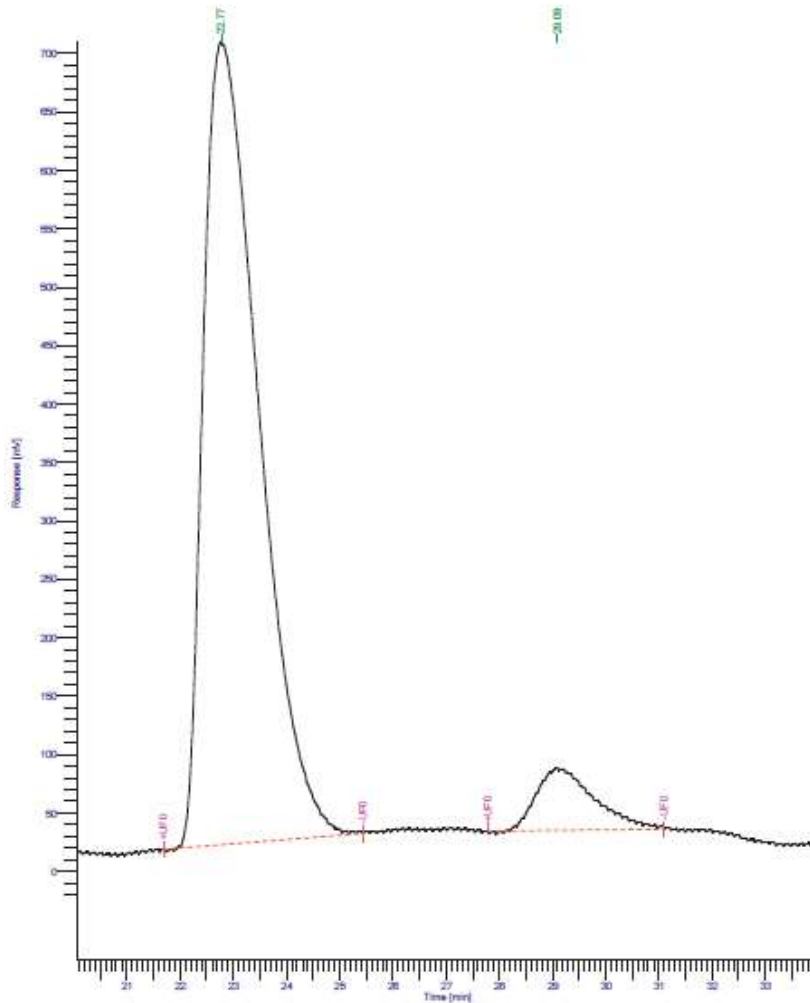

(S)-Pregabalin **11**

mpreg da974MeOD

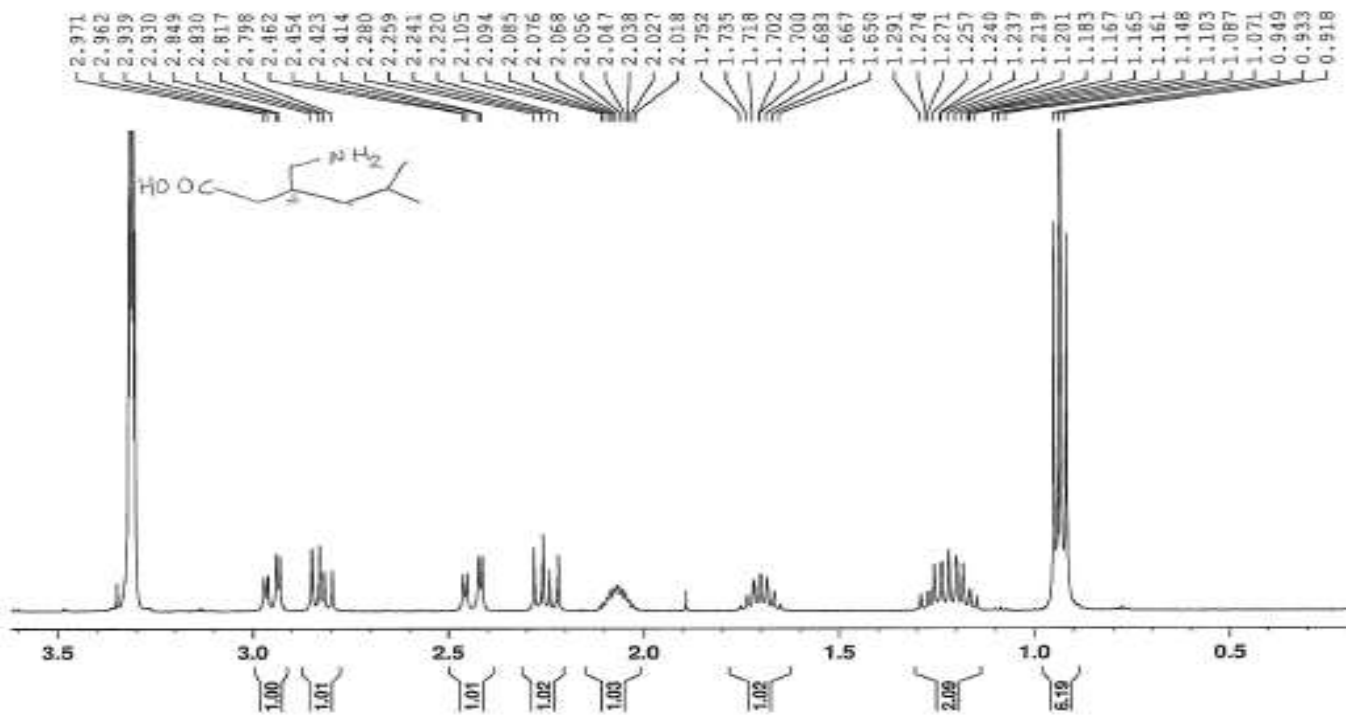

mpreg da974MeOD

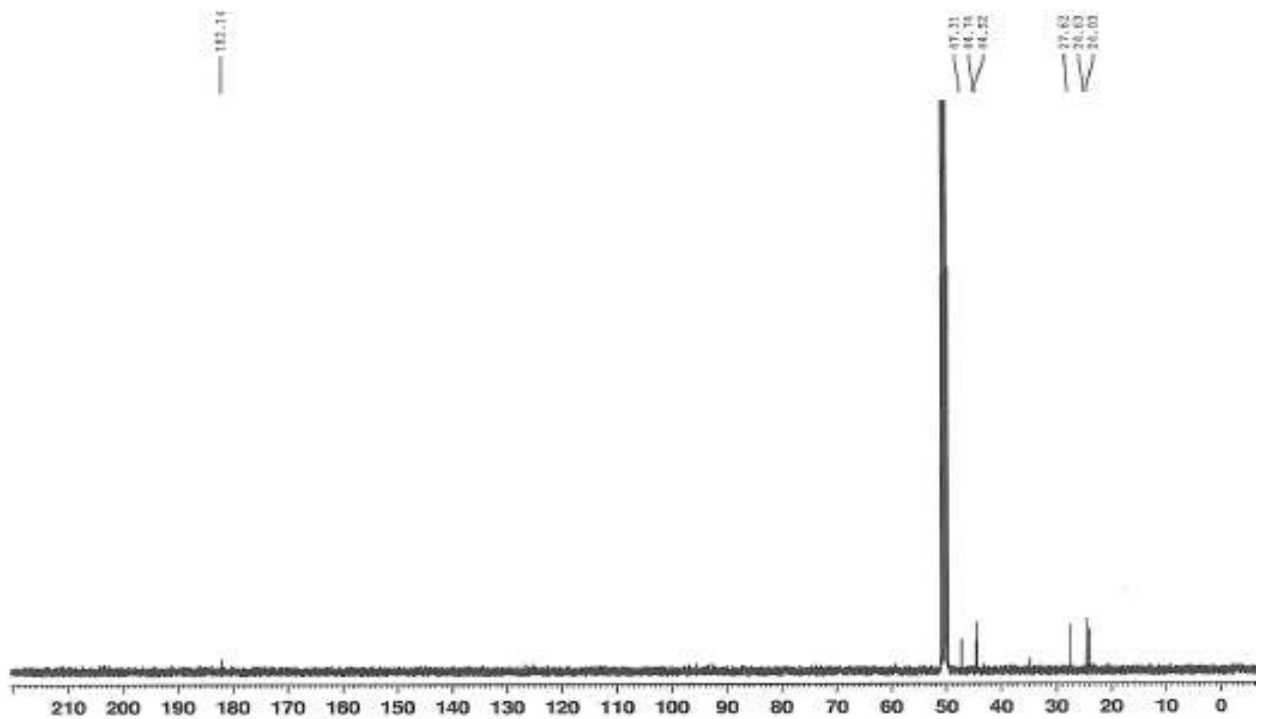

Supplement: c4ob02109f1.pdf [file c4ob02109f1.pdf]
